# Supplementary material for: Asymmetric 1,3-dipolar cycloaddition reaction of chiral 1-alkyl-1,2-diphospholes with diphenyldiazomethane
Source: Royal Society of Chemistry journal article supplement (doi:10.1039/d0ra08080b), 2020-01-01
Supplement: d0ra08080b1.pdf [file d0ra08080b1.pdf]

# Supporting Information (SI) for:

## Asymmetric 1,3-dipolar cycloaddition reaction of chiral 1-alkyl-1,2-diphospholes with diphenyldiazomethane

Yulia Ganushevich,<sup>a</sup> Almaz Zagidullin,<sup>a</sup> Svetlana Kondrashova,<sup>a</sup> Shamil Latypov,<sup>a</sup> Vasili Miluykov,<sup>a</sup> Peter Lönnecke,<sup>b</sup> Evamarie Hey-Hawkins<sup>b</sup>

<sup>a</sup>*Arbuzov Institute of Organic and Physical Chemistry, FRC Kazan Scientific Center of RAS, 420088, Kazan, Russia, [almaz.zagidullin@gmail.com](mailto:almaz.zagidullin@gmail.com)*

<sup>b</sup>*Institute of Inorganic Chemistry, Leipzig University, 04103, Leipzig, Germany*

### Table of contents

pages

|                                                                                                                                                                                                             |     |
|-------------------------------------------------------------------------------------------------------------------------------------------------------------------------------------------------------------|-----|
| <b>Calculation details</b> .....                                                                                                                                                                            | S3  |
| <b>Table S1.</b> Energies (PBE0/6-31+G(d)) of main forms due to rotation around P2-CH <sub>2</sub> bond in the model of compound <b>3</b> ( <b>3'</b> , methyl instead of menthyl). .....                   | S4  |
| <b>Figure S1.</b> The major form of the model compound <b>3'</b> (methyl instead of menthyl): front and side views. ....                                                                                    | S4  |
| <b>Table S2.</b> Energies (PBE0/6-31+G(d)) and some key <sup>13</sup> C and <sup>31</sup> P NMR chemical shifts (GIAO PBE0/6-31+G(d)//PBE0/6-311G(2d,2p)) calculated for <b>3a</b> and <b>3b</b> .<br>..... | S4  |
| <b>Figure S2.</b> High field sections of the <sup>1</sup> H NMR spectra of <b>3a</b> (a, b) and <b>3b</b> (c, d) in CDCl <sub>3</sub> at room and low temperatures. ....                                    | S5  |
| <b>Table S3.</b> Energies (PBE0/6-31+G(d)) and some key <sup>13</sup> C and <sup>31</sup> P NMR chemical shifts (GIAO PBE0/6-31+G(d)//PBE0/6-311G(2d,2p)) calculated for <b>5a</b> and <b>5b</b> .<br>..... | S6  |
| <b>Figure S3.</b> Structures of isomers <b>5a</b> (a) and <b>5b</b> (b) with indicative NMR effects. ....                                                                                                   | S6  |
| <b>Figure S4.</b> 1D <sup>1</sup> H and <sup>31</sup> P{ <sup>1</sup> H} NMR spectra of <b>3a</b> in CDCl <sub>3</sub> at T = 303 K. ....                                                                   | S7  |
| <b>Figure S5.</b> 2D <sup>1</sup> H- <sup>31</sup> P HMBC NMR spectrum of <b>3a</b> in CDCl <sub>3</sub> at T = 303 K. ....                                                                                 | S8  |
| <b>Figure S6.</b> 1D <sup>1</sup> H, <sup>13</sup> C DEPT and <sup>13</sup> C{ <sup>1</sup> H} NMR spectra of <b>3a</b> in CDCl <sub>3</sub> at T = 303 K. ....                                             | S9  |
| <b>Figure S7.</b> 2D <sup>1</sup> H- <sup>1</sup> H COSY NMR spectrum of <b>3a</b> in CDCl <sub>3</sub> at T = 303 K. ....                                                                                  | S10 |
| <b>Figure S8.</b> 2D <sup>1</sup> H- <sup>1</sup> H COSY NMR spectrum of <b>3a</b> in CDCl <sub>3</sub> at T = 233 K. ....                                                                                  | S11 |
| <b>Figure S9.</b> 2D <sup>1</sup> H- <sup>13</sup> C HSQC NMR spectrum of <b>3a</b> in CDCl <sub>3</sub> at T = 303 K. ....                                                                                 | S12 |
| <b>Figure S10.</b> 2D <sup>1</sup> H- <sup>13</sup> C HMBC NMR spectrum of <b>3a</b> in CDCl <sub>3</sub> at T = 303 K. ....                                                                                | S13 |
| <b>Figure S11.</b> 1D <sup>1</sup> H and <sup>1</sup> H NOESY NMR spectra of <b>3a</b> in CDCl <sub>3</sub> at T = 303 K. ....                                                                              | S14 |
| <b>Figure S12.</b> 1D <sup>1</sup> H and <sup>31</sup> P{ <sup>1</sup> H} NMR spectra of <b>3b</b> in CDCl <sub>3</sub> at T = 303 K. ....                                                                  | S15 |

|                                                                                                                                                                               |     |
|-------------------------------------------------------------------------------------------------------------------------------------------------------------------------------|-----|
| <b>Figure S13.</b> 2D $^1\text{H}$ - $^{31}\text{P}$ HMBC NMR spectrum of <b>3b</b> in $\text{CDCl}_3$ at $T = 303\text{ K}$ .                                                | S16 |
| <b>Figure S14.</b> 1D $^1\text{H}$ , $^{13}\text{C}$ DEPT and $^{13}\text{C}\{^1\text{H}\}$ NMR spectra of <b>3b</b> in $\text{CDCl}_3$ at $T = 303\text{ K}$ .               | S17 |
| <b>Figure S15.</b> 2D $^1\text{H}$ - $^1\text{H}$ COSY NMR spectrum of <b>3b</b> in $\text{CDCl}_3$ at $T = 303\text{ K}$ .                                                   | S18 |
| <b>Figure S16.</b> 2D $^1\text{H}$ - $^1\text{H}$ COSY NMR spectrum of <b>3b</b> in $\text{CDCl}_3$ at $T = 233\text{ K}$ .                                                   | S19 |
| <b>Figure S17.</b> 2D $^1\text{H}$ - $^{13}\text{C}$ HSQC NMR spectrum of <b>3b</b> in $\text{CDCl}_3$ at $T = 303\text{ K}$ .                                                | S20 |
| <b>Figure S18.</b> 2D $^1\text{H}$ - $^{13}\text{C}$ HMBC NMR spectrum of <b>3b</b> in $\text{CDCl}_3$ at $T = 303\text{ K}$ .                                                | S21 |
| <b>Figure S19.</b> 1D $^1\text{H}$ and $^1\text{H}$ NOESY NMR spectra of <b>3b</b> in $\text{CDCl}_3$ at $T = 303\text{ K}$ .                                                 | S22 |
| <b>Figure S20.</b> 1D $^1\text{H}$ and $^1\text{H}$ NOESY NMR spectra of <b>3b</b> in $\text{CDCl}_3$ at $T = 303\text{ K}$ .                                                 | S23 |
| <b>Figure S21.</b> 1D $^1\text{H}$ and $^{31}\text{P}\{^1\text{H}\}$ NMR spectra of <b>5a</b> and <b>5b</b> in $\text{CDCl}_3$ at $T = 303\text{ K}$ .                        | S24 |
| <b>Figure S22.</b> 2D $^1\text{H}$ - $^{31}\text{P}$ HMBC NMR spectrum of <b>5a</b> and <b>5b</b> in $\text{CDCl}_3$ at $T = 303\text{ K}$ .                                  | S25 |
| <b>Figure S23.</b> 1D $^1\text{H}$ , $^{13}\text{C}$ DEPT and $^{13}\text{C}\{^1\text{H}\}$ NMR spectra of <b>5a</b> and <b>5b</b> in $\text{CDCl}_3$ at $T = 303\text{ K}$ . | S26 |
| <b>Figure S24.</b> 2D $^1\text{H}$ - $^1\text{H}$ COSY NMR spectrum of <b>5a</b> and <b>5b</b> in $\text{CDCl}_3$ at $T = 303\text{ K}$ .                                     | S27 |
| <b>Figure S25.</b> 2D $^1\text{H}$ - $^{13}\text{C}$ HSQC NMR spectrum of <b>5a</b> and <b>5b</b> in $\text{CDCl}_3$ at $T = 303\text{ K}$ .                                  | S28 |
| <b>Figure S26.</b> 2D $^1\text{H}$ - $^{13}\text{C}$ HMBC NMR spectrum of <b>5a</b> and <b>5b</b> in $\text{CDCl}_3$ at $T = 303\text{ K}$ .                                  | S29 |
| <b>Figure S27.</b> 1D $^1\text{H}$ and $^1\text{H}$ NOESY NMR spectra of <b>5a</b> and <b>5b</b> in $\text{CDCl}_3$ at $T = 303\text{ K}$ .                                   | S30 |
| <b>Figure S28.</b> 1D $^1\text{H}$ and $^1\text{H}$ NOESY NMR spectra of <b>5a</b> and <b>5b</b> in $\text{CDCl}_3$ at $T = 303\text{ K}$ .                                   | S31 |
| <b>Figure S29.</b> 1D $^1\text{H}$ and $^1\text{H}$ NOESY NMR spectra of <b>5a</b> and <b>5b</b> in $\text{CDCl}_3$ at $T = 303\text{ K}$ .                                   | S32 |
| <b>Figure S30.</b> 1D $^1\text{H}$ and $^1\text{H}$ TOCSY NMR spectra of <b>5a</b> and <b>5b</b> in $\text{CDCl}_3$ at $T = 303\text{ K}$ .                                   | S33 |
| <b>Table S4.</b> Basic crystallographic structure parameters for <b>5a</b> .                                                                                                  | S34 |
| <b>Figure S31.</b> Molecular structure of <b>5a</b> .                                                                                                                         | S35 |
| <b>Figure S32.</b> Thermal ellipsoid plot (50% probability level) for the crystal structure of <b>5a</b> .                                                                    | S36 |
| <b>References.</b>                                                                                                                                                            | S37 |

## Calculation details

The quantum chemical calculations were performed with the Gaussian 03 software package.<sup>1</sup> Full geometry optimizations have been carried out within the framework of DFT (PBE0) method using 6-31+G(d) basis sets. Chemical shifts were calculated at the PBE0/6-311G(2d,2p) level of theory. <sup>13</sup>C chemical shifts were referred to TMS. <sup>31</sup>P chemical shifts were referred to H<sub>3</sub>PO<sub>4</sub>, and a linear scaling procedure was applied.<sup>2</sup>

References: see S37

## Details of structure elucidation by NMR

The structures of compounds **3a**, **3b** and **5a** were established by verity of 1D/2D NMR correlation methods. Namely, starting from the group with well known “finger prints” structure of whole compound can be established practically directly.

For example, for **3a** we can start from the P2-CH<sub>2</sub>O protons with characteristic ABXY type spin system (at 3.95 and 3.62 ppm).

As to the menthyl fragment: There is <sup>1</sup>H-<sup>13</sup>C HMBC correlation from the P2-CH<sub>2</sub>O protons to C1' (80.52 ppm). Then from <sup>1</sup>H-<sup>13</sup>C HSQC experiment the H1' (3.01 ppm) proton can be established. Next there are <sup>1</sup>H-<sup>13</sup>C HMBC connectivity's from the H1' proton to C2' (48.91 ppm), to C5' (31.56 ppm), to C7' (24.76 ppm) and to P2-CH<sub>2</sub>O (64.79 ppm) carbons. There are also NOE's from the P2-CH<sub>2</sub>O protons to H1', to H6eq' and to H7' protons. Then combination of <sup>1</sup>H-<sup>1</sup>H COSY, <sup>1</sup>H-<sup>13</sup>C HSQC and <sup>1</sup>H-<sup>13</sup>C HMBC experiments allows to assign all signals in <sup>1</sup>H and <sup>13</sup>C spectra of the menthyl moiety. The most important connectivity's are from H7' to Me-8' and Me-9' (<sup>1</sup>H-<sup>1</sup>H COSY and <sup>1</sup>H-<sup>13</sup>C HMBC); and from H5' to Me-10' (<sup>1</sup>H-<sup>1</sup>H COSY and <sup>1</sup>H-<sup>13</sup>C HMBC).

As to the bicyclic phosphirane fragment: There are <sup>1</sup>H-<sup>31</sup>P HMBC correlations from the P2-CH<sub>2</sub>O protons to P1 (-121.4 ppm) and to P2 (6.2 ppm). There is also <sup>1</sup>H-<sup>13</sup>C HMBC connectivity from the P2-CH<sub>2</sub>O protons to C3 (144.52 ppm). <sup>13</sup>C DEPT experiments help to distinguish protonated carbons from not protonated ones (CH *versus* C) in low field region. Then, four less intense signals of protonated carbons can be assigned to *para*-carbons of phenyl rings. Doublets in low field region of the <sup>1</sup>H spectra are due to *ortho*-protons. Then there is correlation from the *o*-Ph3 (d, 6.3 ppm) protons to C3 (<sup>1</sup>H-<sup>13</sup>C HMBC), to P2 (<sup>1</sup>H-<sup>31</sup>P HMBC) and to the P2-CH<sub>2</sub>O protons (NOE). There are correlations from the *o*-Ph6 (d, 7.65 ppm) and the *o*-Ph6' (d, 6.9 ppm) protons to C6 (54.09 ppm, <sup>1</sup>H-<sup>13</sup>C HMBC) and P1 (<sup>1</sup>H-<sup>31</sup>P HMBC). The *o*-Ph6 *versus* *o*-Ph6' protons can be distinguished upon NOE between the *o*-Ph6 and the *o*-Ph3 protons. There is also NOE between the *o*-Ph3 and the *o*-Ph4 protons. There is <sup>1</sup>H-<sup>13</sup>C HMBC correlation from the *o*-Ph4 protons to C4 (151.12 ppm). Unfortunately, there is no <sup>1</sup>H-<sup>13</sup>C HMBC connectivity's to C5 (73.08 ppm) due to: 1) the *o*-Ph5 protons are broadened due to sterical hindrance; 2) there is no other protons in close proximity. But it's characteristic chemical shift and <sup>1</sup>JCP (37.8 Hz) allows assign the signal to C5. This is also in good agreement with results of calculations. Finally, starting from the ortho-protons all other signals in <sup>13</sup>C and <sup>1</sup>H spectra can be well assigned upon <sup>1</sup>H-<sup>13</sup>C HMBC, <sup>1</sup>H-<sup>13</sup>C HSQC and <sup>1</sup>H-<sup>1</sup>H COSY connectivity's.

In similar way structures of **3b** and **5a** were established.

In the case of compound **5b** the bicyclic phosphirane fragment signals in <sup>1</sup>H and <sup>13</sup>C NMR spectra cannot be resolved (except C4-*o*-Ph and C3-*o*-Ph) due to intensive overlap with the main isomer (**5a**) signals therefore only the data for the neomenthyl fragment is given. In this case <sup>1</sup>H-<sup>31</sup>P HMBC, <sup>1</sup>H-<sup>1</sup>H COSY and <sup>1</sup>H-<sup>13</sup>C HSQC spectra are particularly helpful. The <sup>1</sup>H-<sup>31</sup>P HMBC spectra allows to reveal the protons coupled with minor phosphorus signals, while the <sup>1</sup>H-<sup>1</sup>H COSY and <sup>1</sup>H-<sup>13</sup>C HSQC spectra helps to resolve <sup>1</sup>H and <sup>13</sup>C signals of neomenthyl fragment. But no information about exact multiplet structure of the <sup>1</sup>H and <sup>13</sup>C spectra can be obtained in this way for some of the protons.

**Table S1.** Energies (PBE0/6-31+G(d)) of main forms due to rotation around P2-CH<sub>2</sub> bond in the model of compound **3** (**3'**, methyl instead of menthyl).

| Energy   | -g*           | trans         | +g            |
|----------|---------------|---------------|---------------|
| hartree  | -2145.8153312 | -2145.8190703 | -2145.8169151 |
| kcal/mol | <b>2.3</b>    | <b>0</b>      | <b>1.4</b>    |

\* orientation with respect to the lone pair of electrons at phosphorus, C-O with lone pair of electrons; "+" – clockwise;

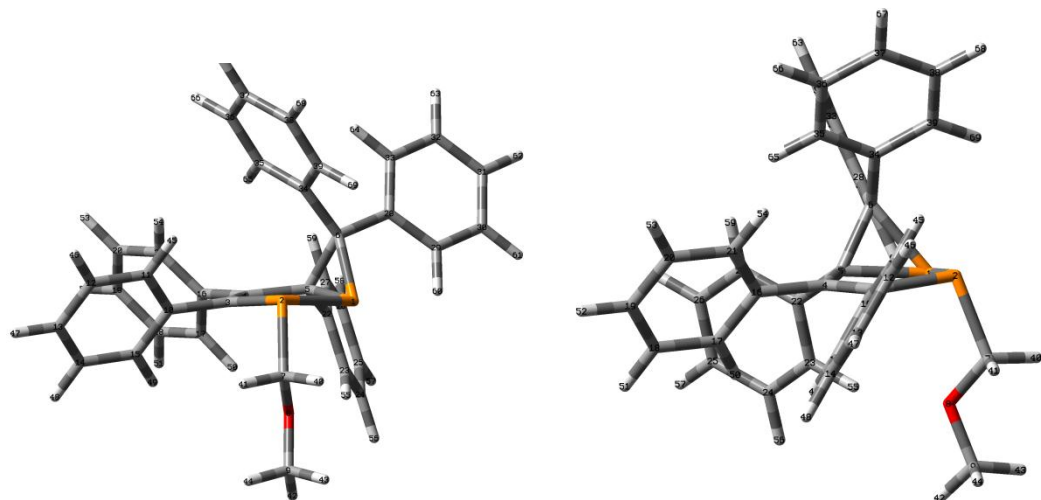

**Figure S1.** The major form of the model compound **3'** (methyl instead of menthyl): front and side views.

**Table S2.** Energies (PBE0/6-31+G(d)) and some key <sup>13</sup>C and <sup>31</sup>P NMR chemical shifts (GIAO PBE0/6-31+G(d)//PBE0/6-311G(2d,2p)) calculated for **3a** and **3b**.

|                  | <b>3a</b>     | <b>3b</b>    |
|------------------|---------------|--------------|
| Energy, hartree  | -2498.0263604 | -2498.026385 |
| Energy, kcal/mol | <b>0.015</b>  | <b>0</b>     |
| P1               | -105.7        | -102.4       |
| P2               | 13.6          | 16.1         |
| C3               | 156.0         | 156.9        |
| C4               | 158.5         | 157.7        |
| C5               | 80.3          | 80.3         |
| C6               | 58.2          | 58.4         |

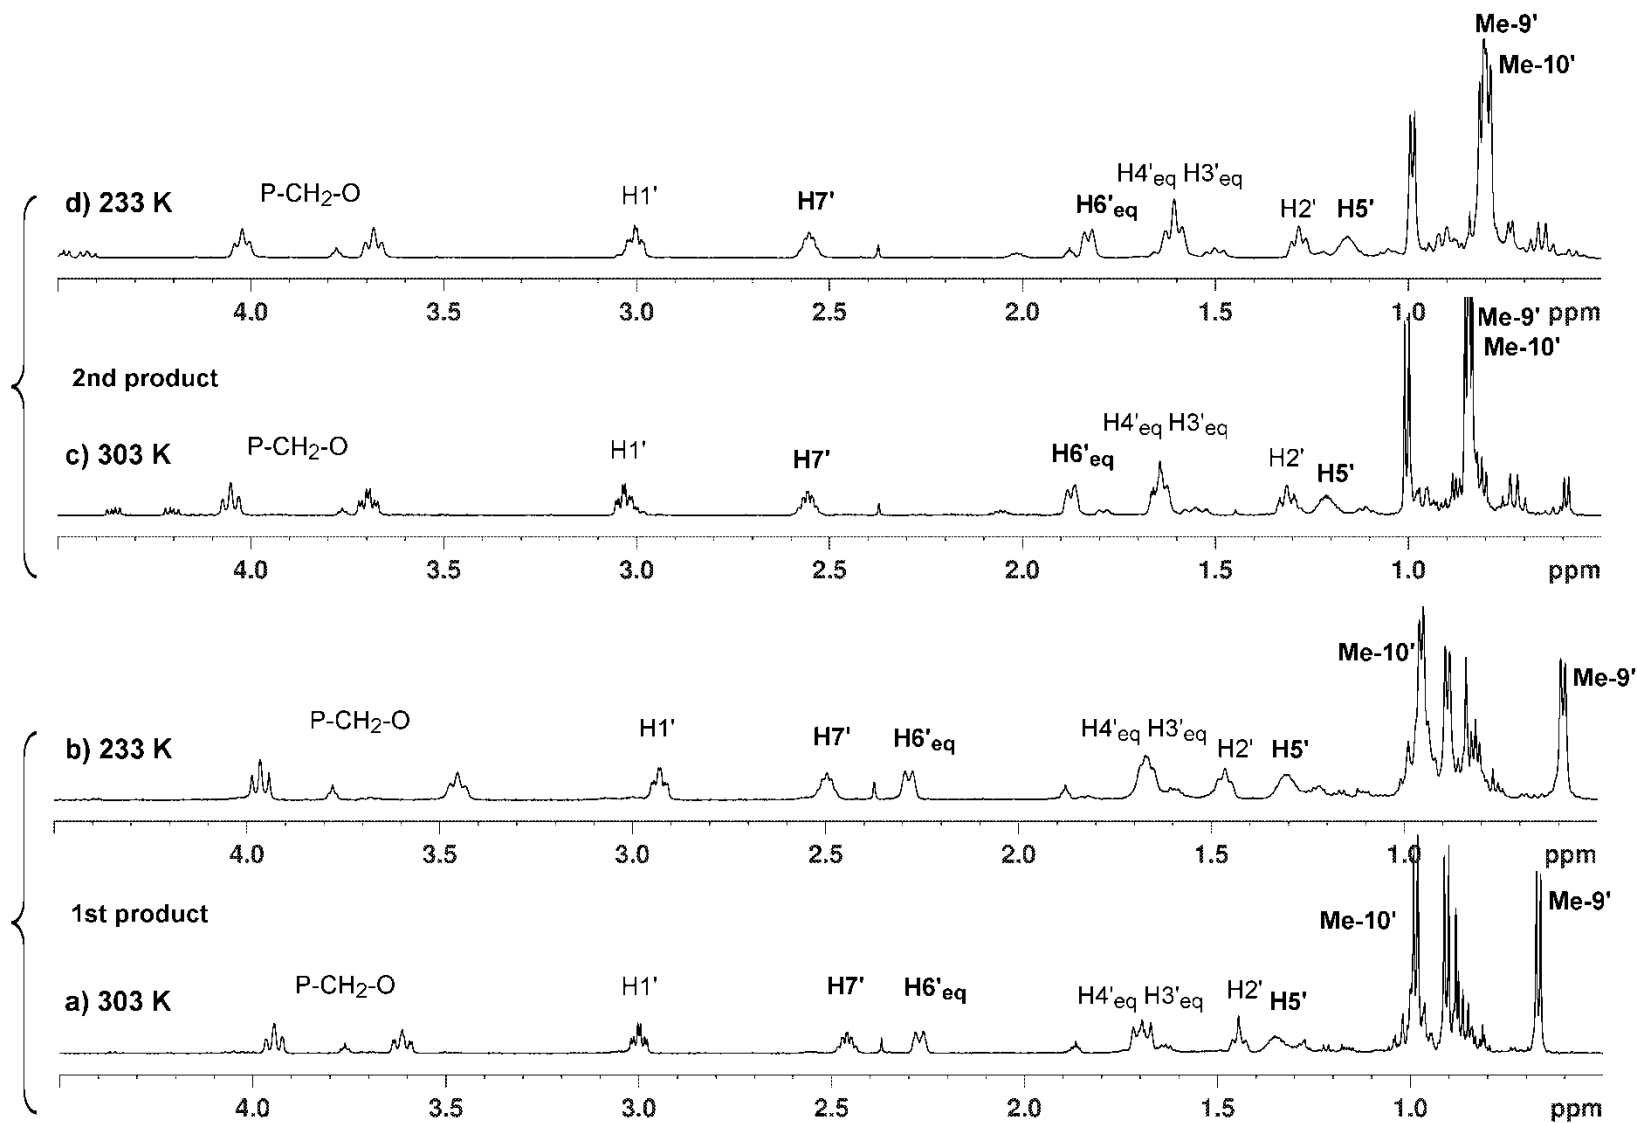

**Figure S2.** High field sections of the  $^1\text{H}$  NMR spectra of **3a** (a, b) and **3b** (c, d) in  $\text{CDCl}_3$  at room and low temperatures.

**Table S3.** Energies (PBE0/6-31+G(d)) and some key  $^{13}\text{C}$  and  $^{31}\text{P}$  NMR chemical shifts (GIAO PBE0/6-31+G(d)//PBE0/6-311G(2d,2p)) calculated for **5a** and **5b**.

|                  | <b>5a</b>     | <b>5b</b>     |
|------------------|---------------|---------------|
| Energy,          | -2383.6206784 | -2383.6181352 |
| Energy, kcal/mol | <b>0</b>      | <b>1.6</b>    |
| P1               | -85.7         | -104.7        |
| P2               | 22.3          | 15.5          |
| C3               | 159.5         | 155.6         |
| C4               | 156.8         | 159.5         |
| C5               | 82.7          | 80.8          |
| C6               | 60.0          | 58.0          |

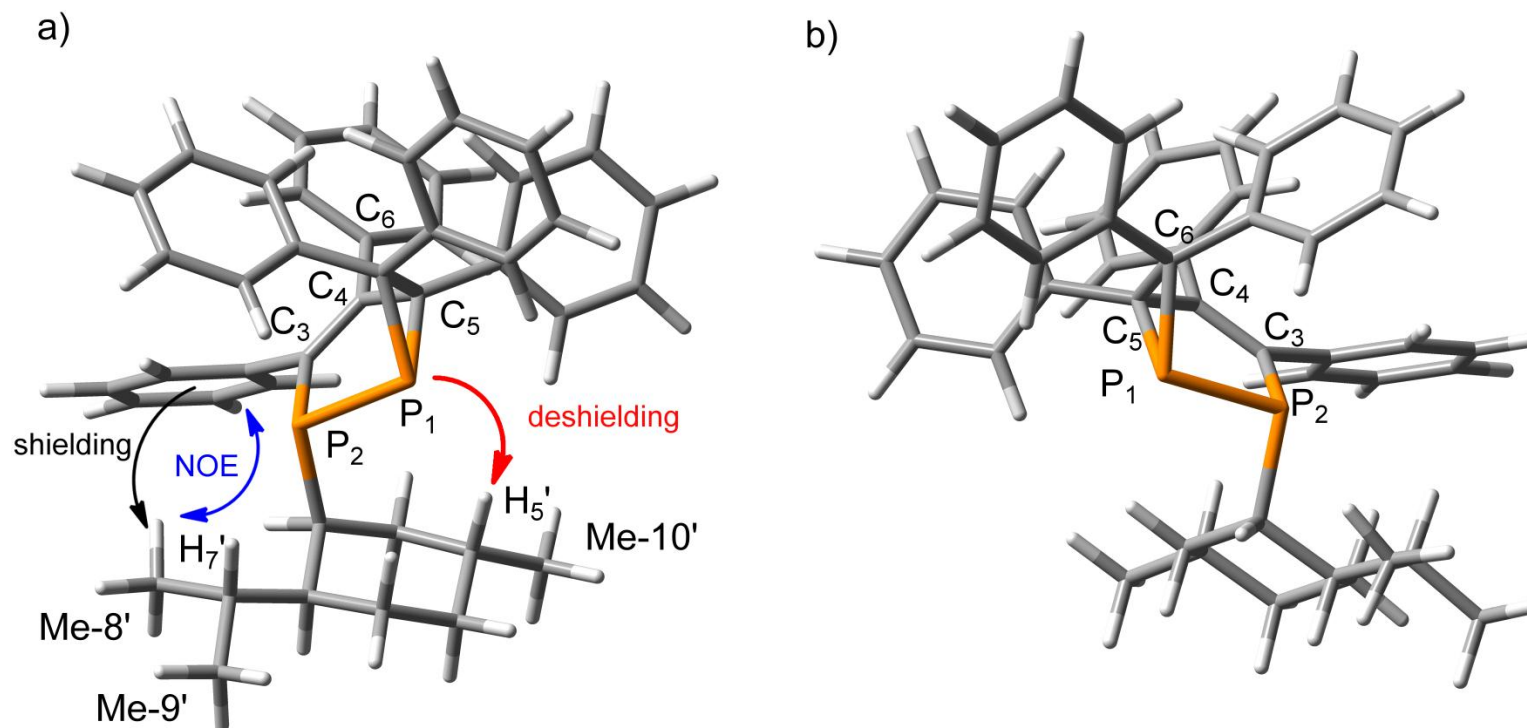

**Figure S3.** Structures of isomers **5a** (a) and **5b** (b) with indicative NMR effects.

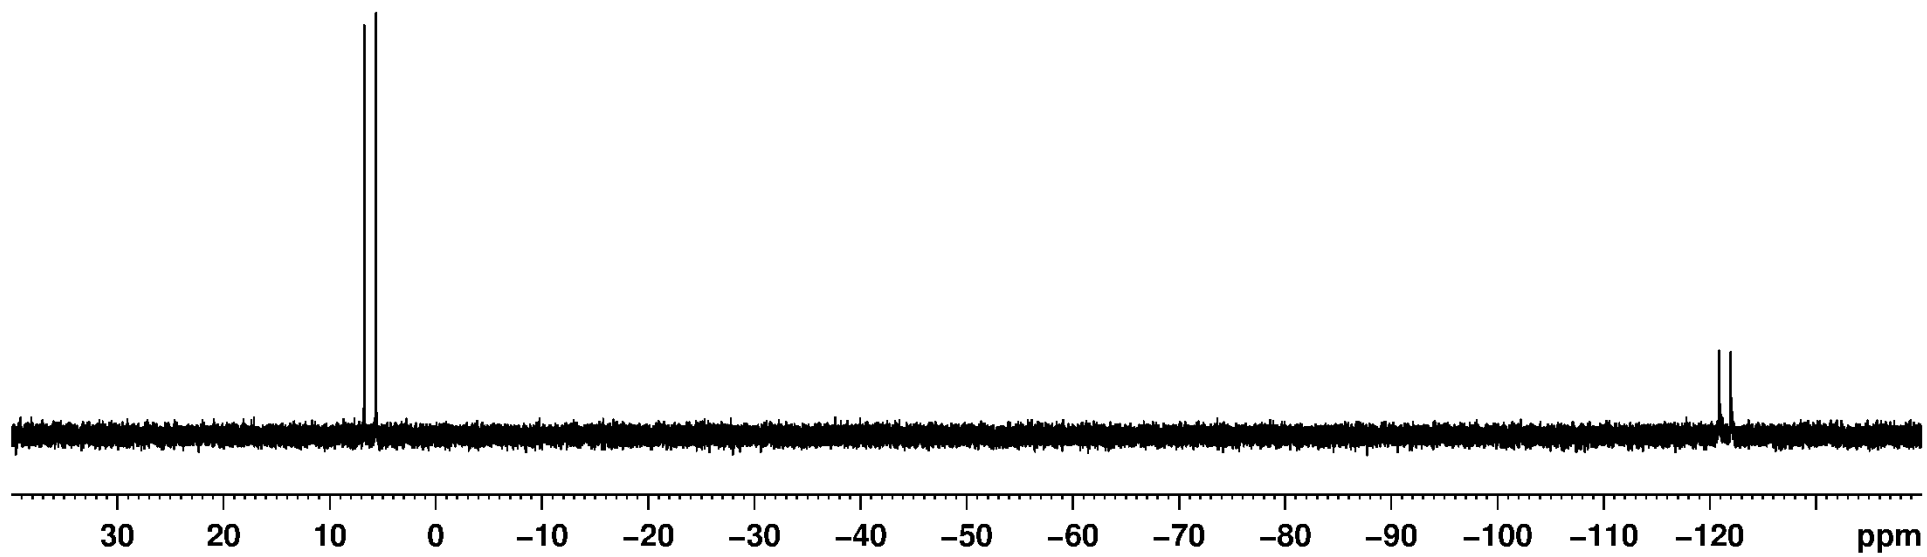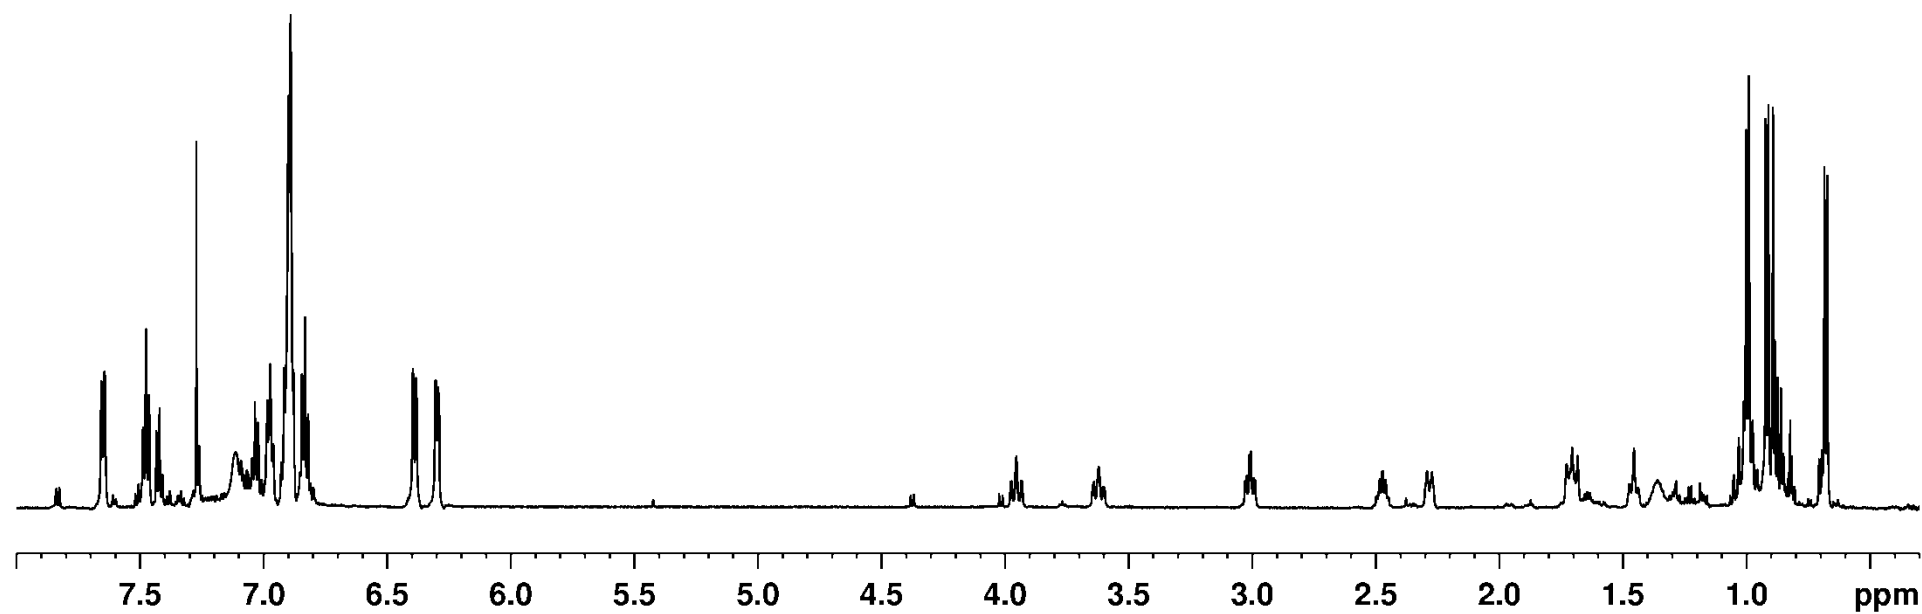

**Figure S4.** 1D  $^1\text{H}$  and  $^{31}\text{P}\{^1\text{H}\}$  NMR spectra of **3a** in  $\text{CDCl}_3$  at  $T = 303$  K.

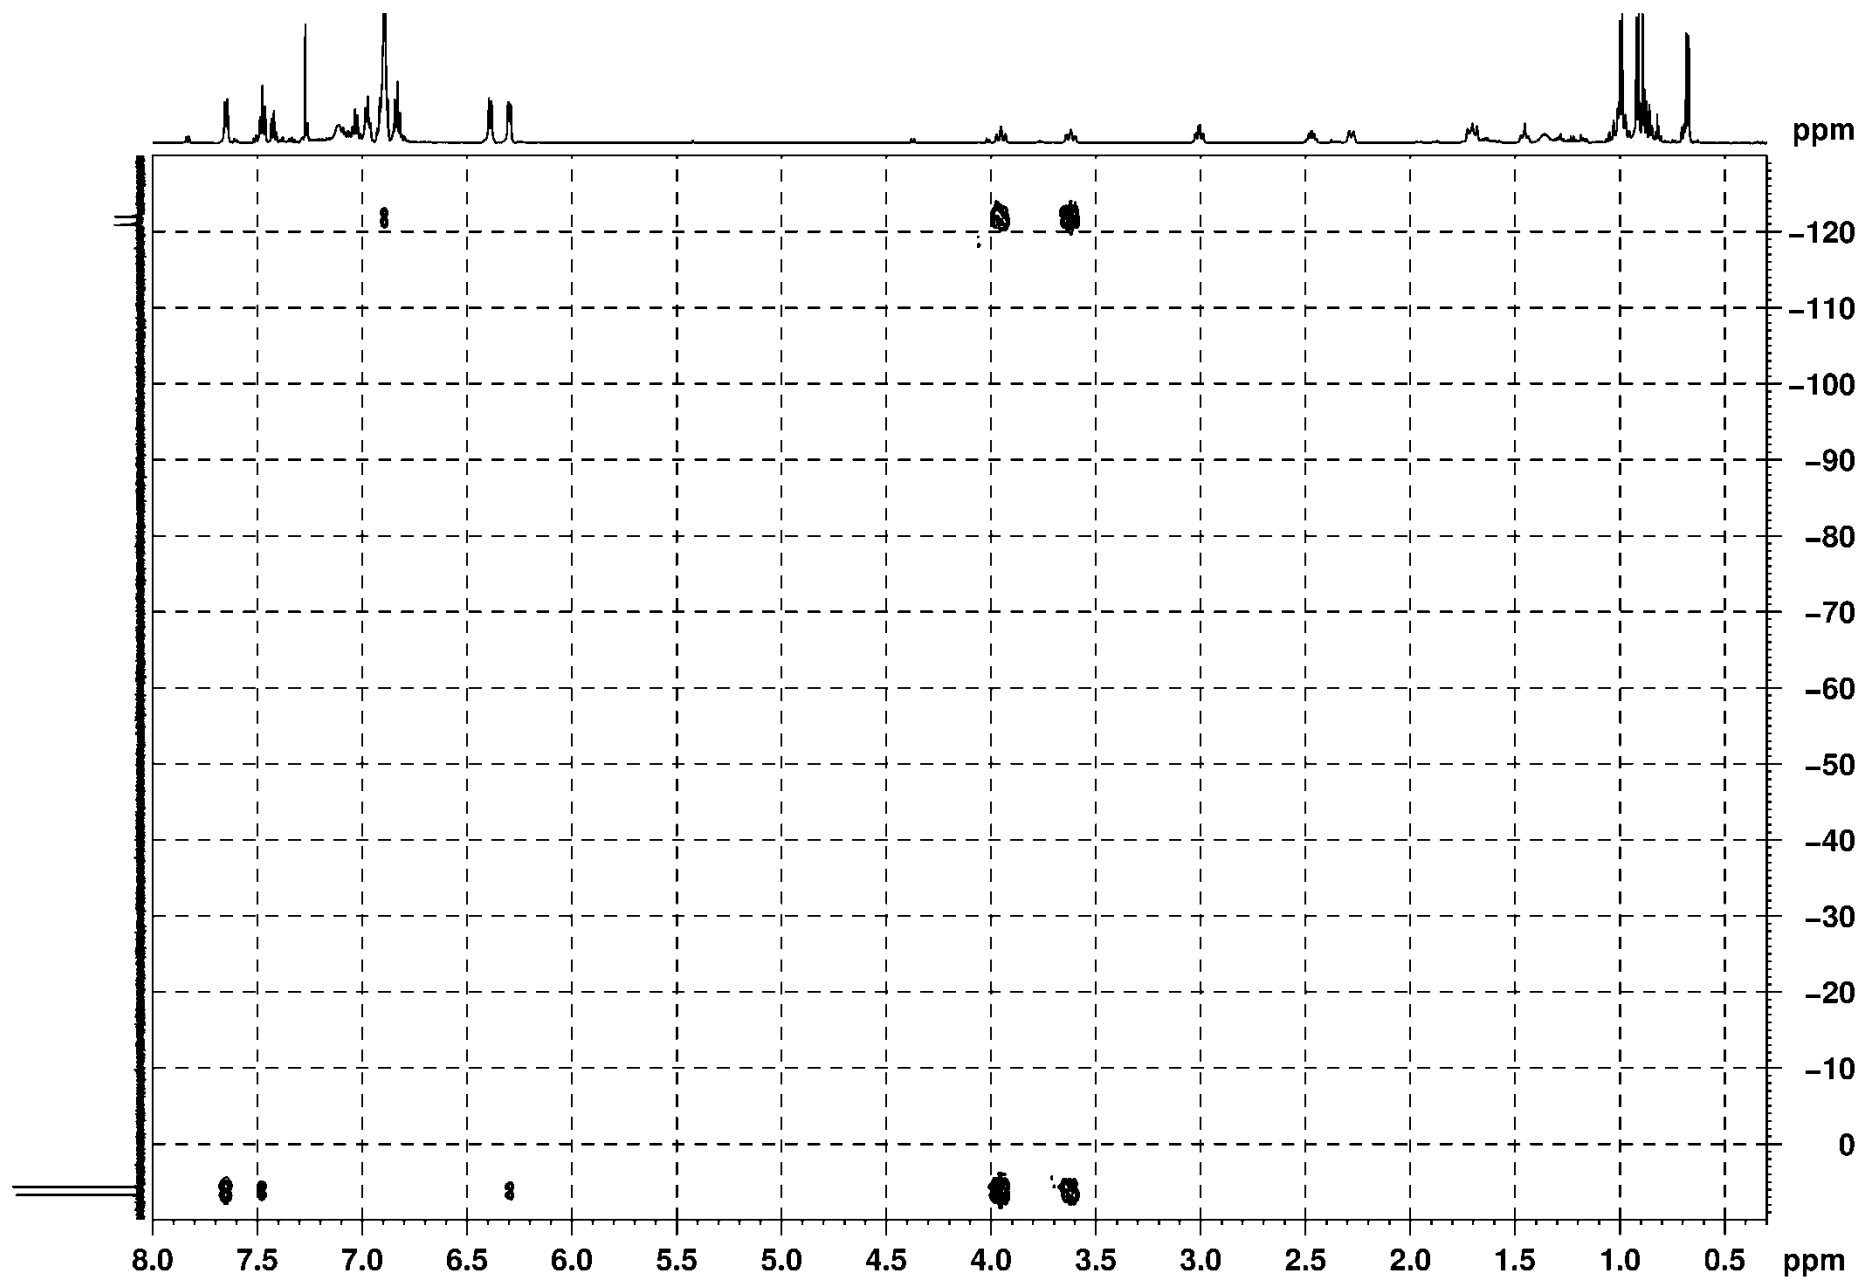

Figure S5. 2D  $^1\text{H}$ - $^{31}\text{P}$  HMBC NMR spectrum of **3a** in  $\text{CDCl}_3$  at  $T = 303$  K.



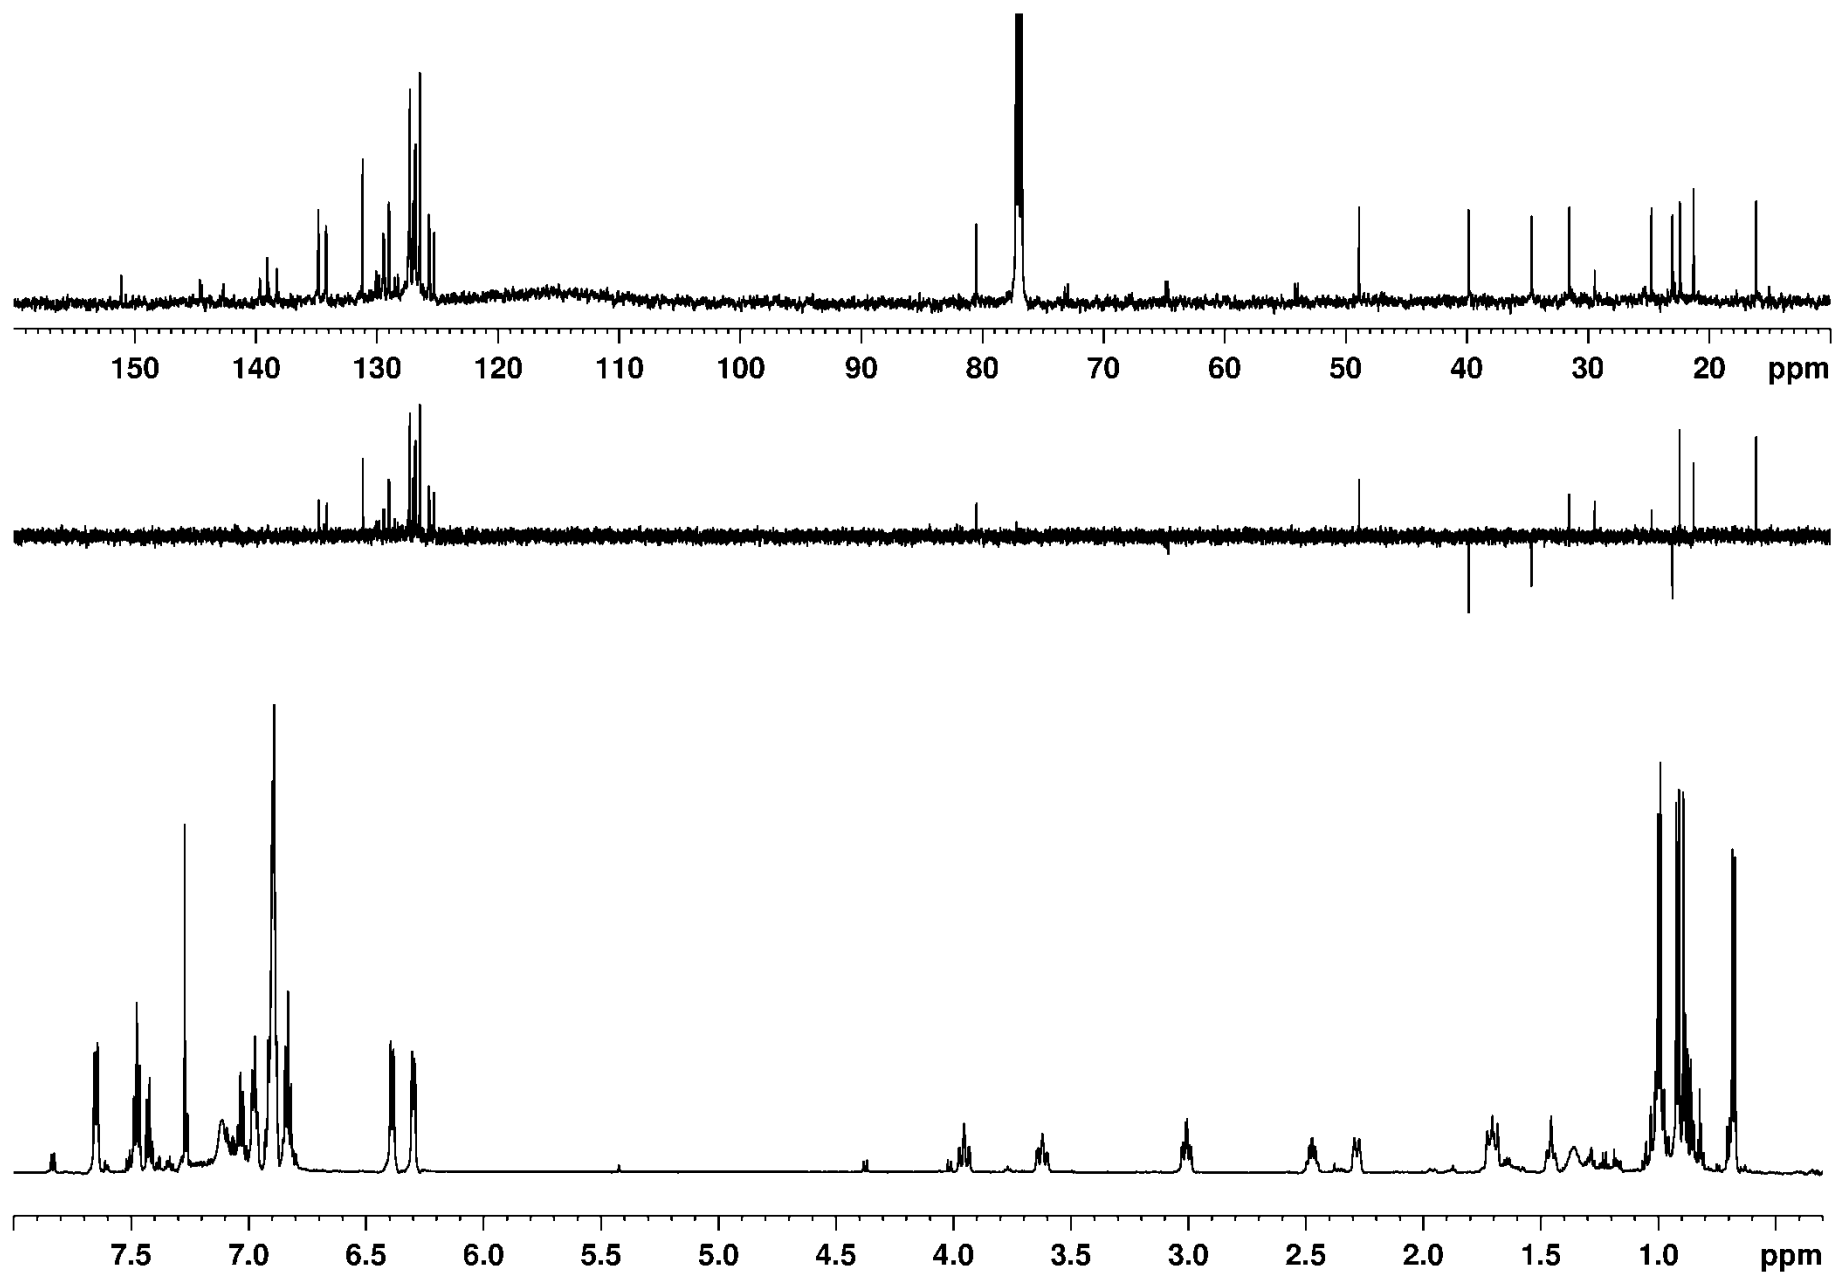

**Figure S6.** 1D <sup>1</sup>H, <sup>13</sup>C DEPT and <sup>13</sup>C{<sup>1</sup>H} NMR spectra of **3a** in CDCl<sub>3</sub> at T = 303 K.

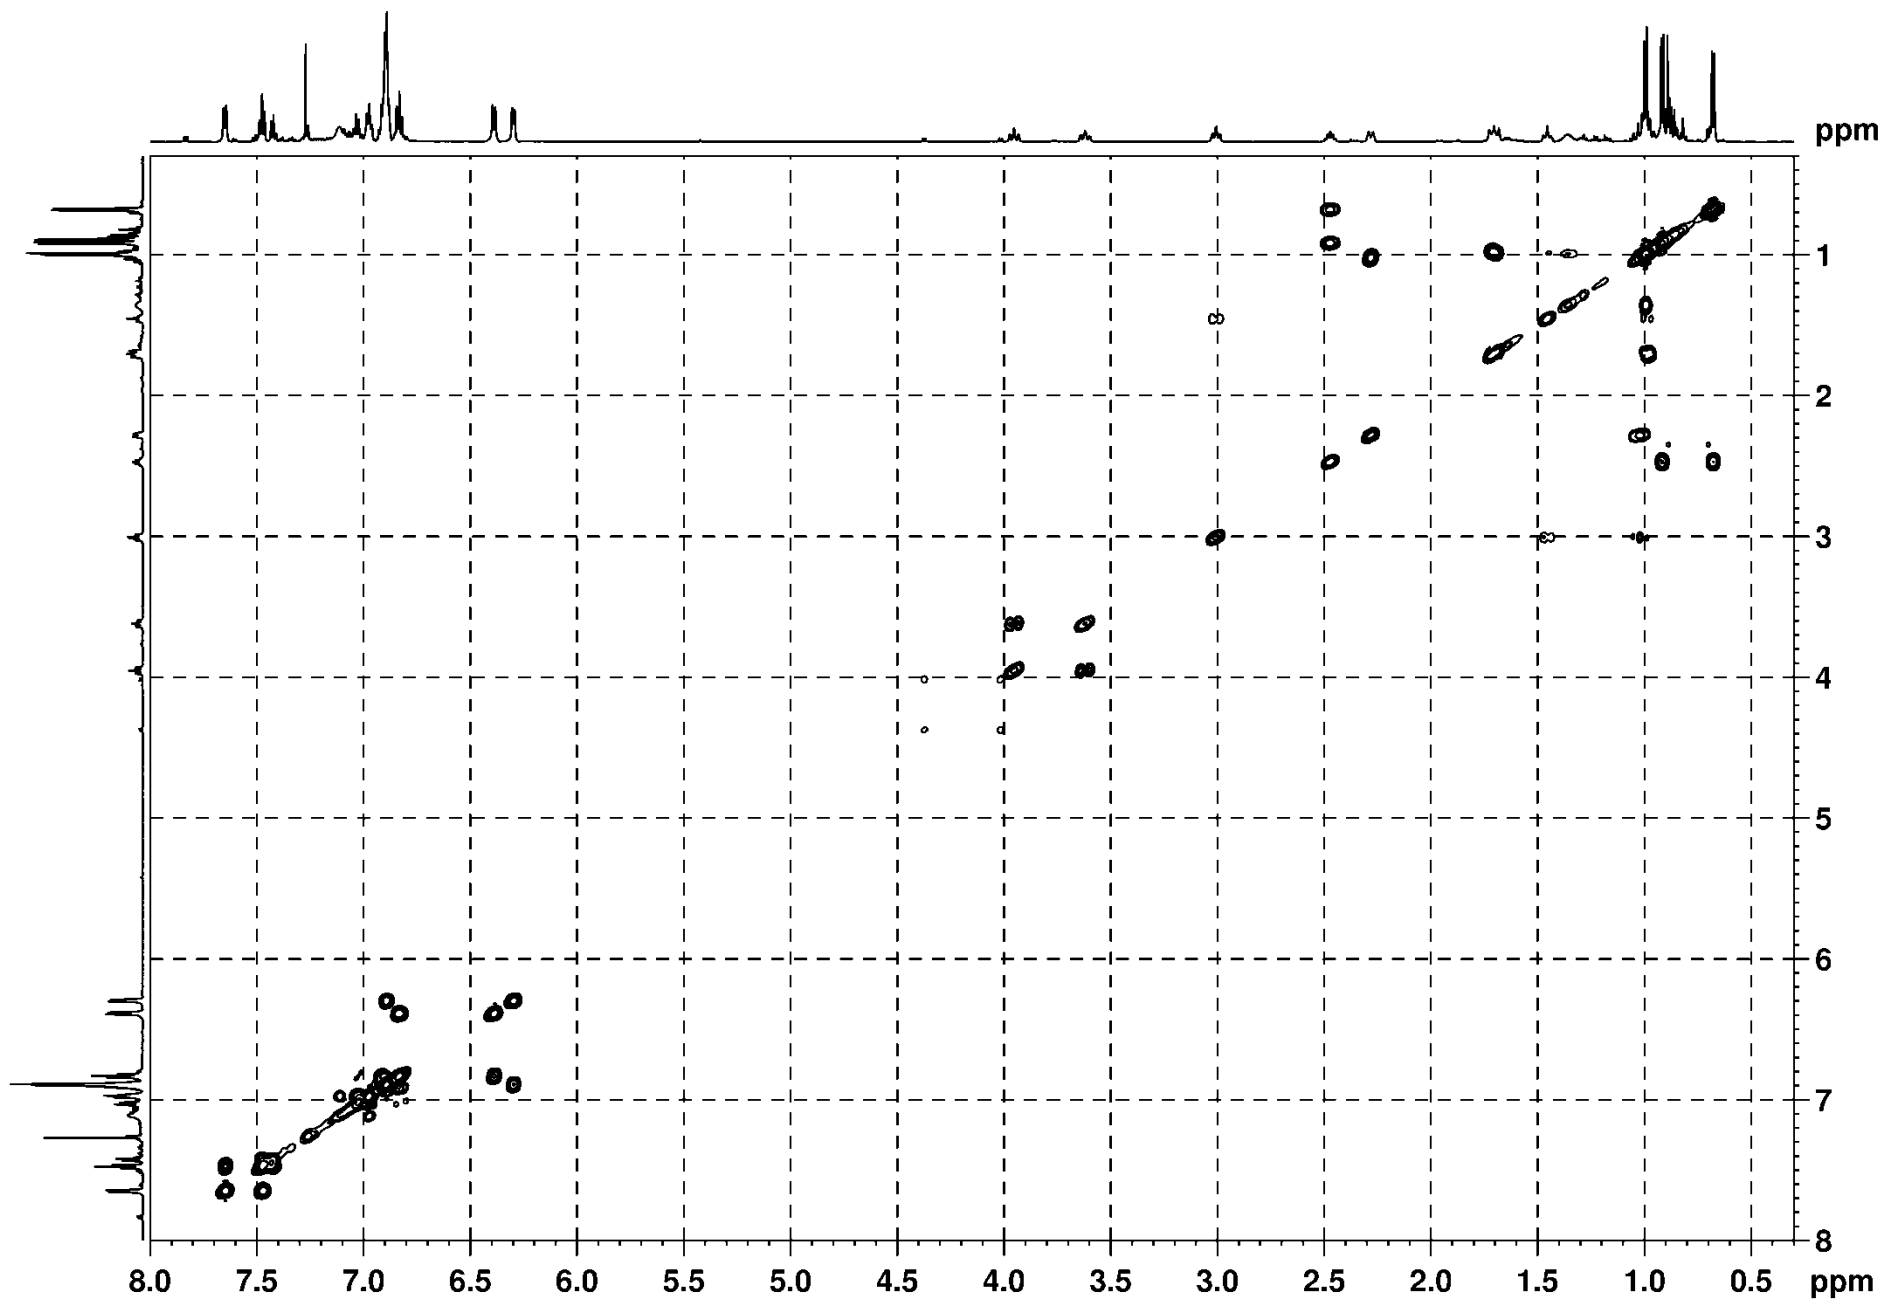

Figure S7. 2D  $^1\text{H}$ - $^1\text{H}$  COSY NMR spectrum of **3a** in  $\text{CDCl}_3$  at  $T = 303$  K.

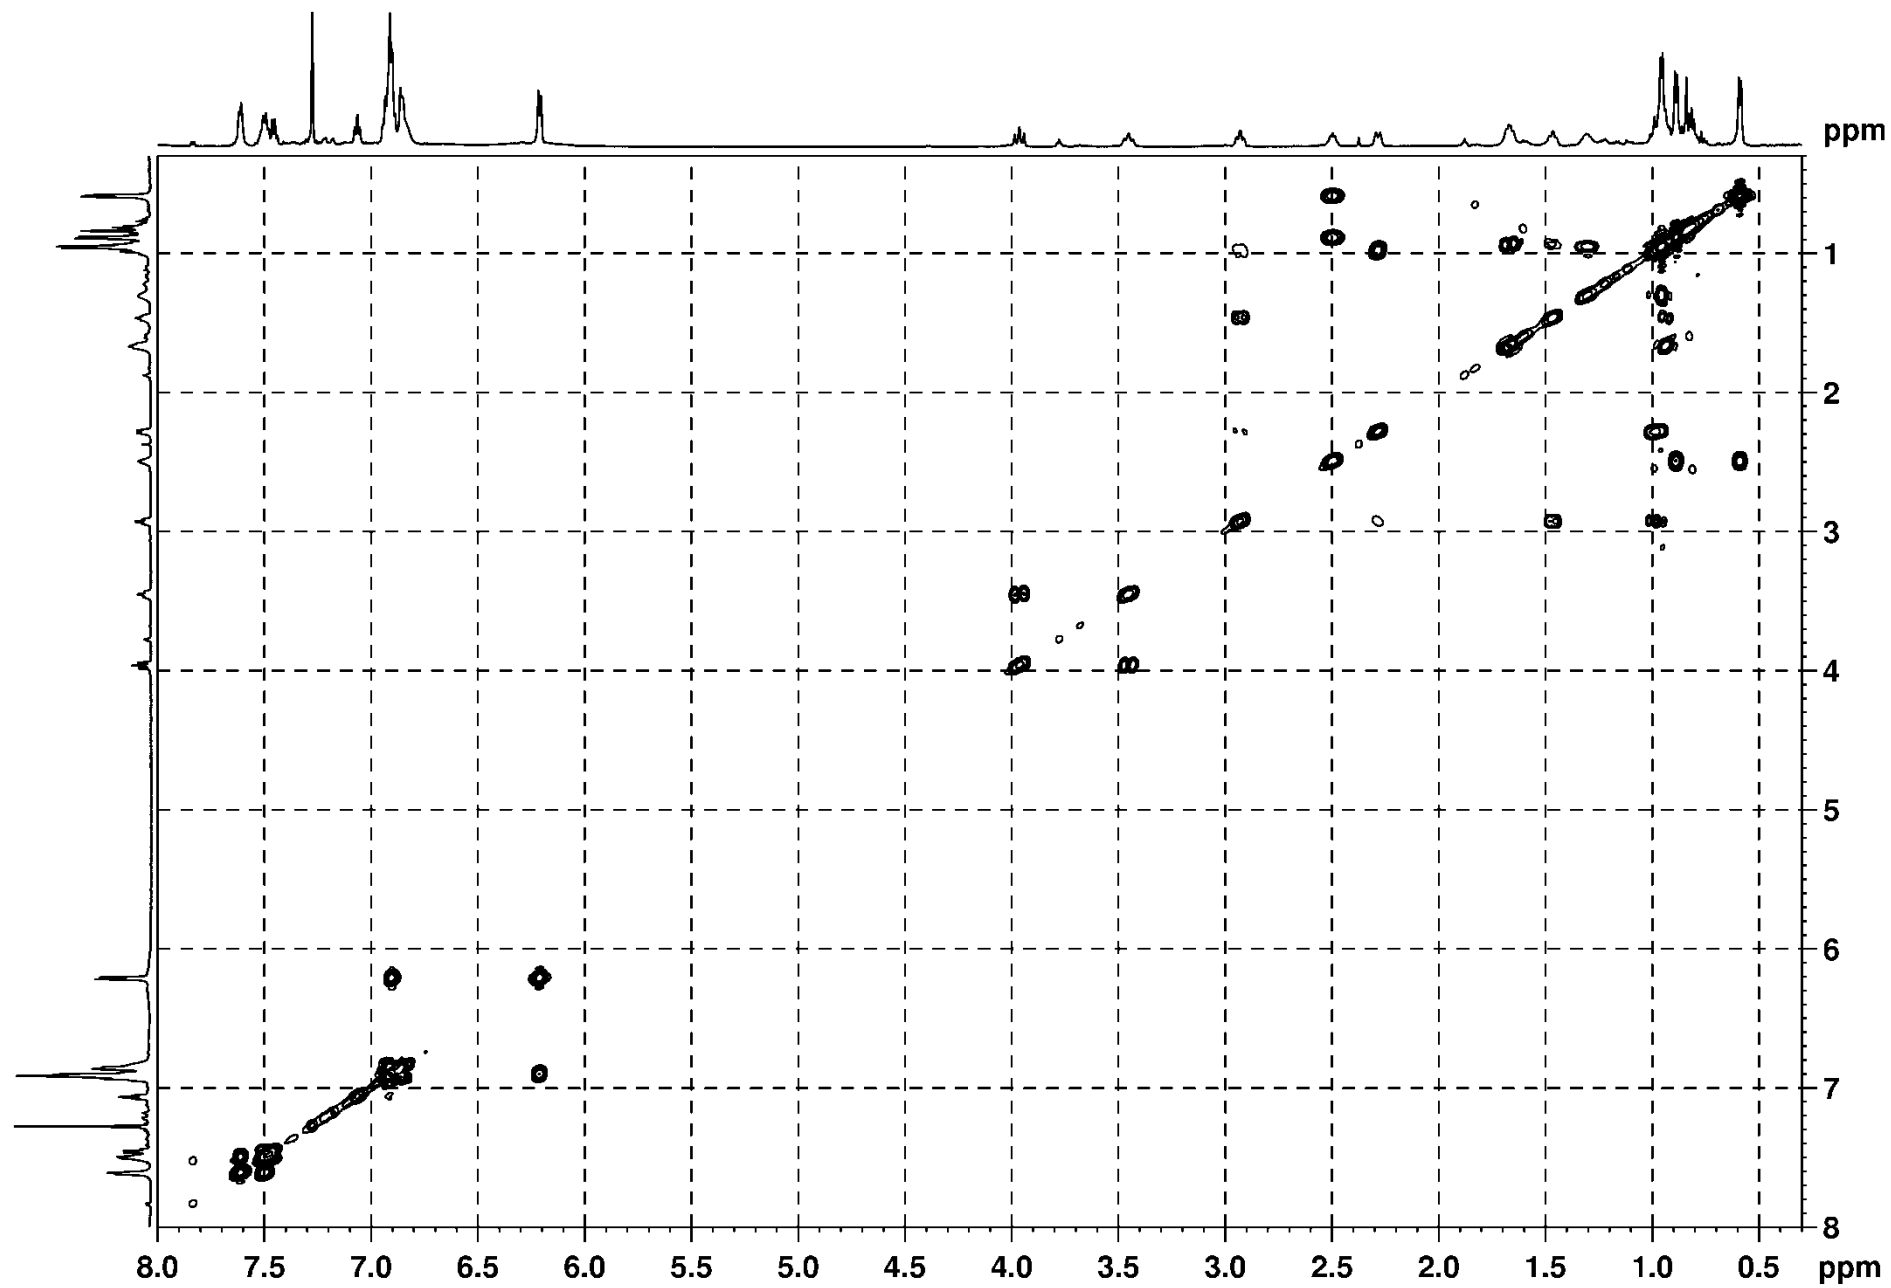

Figure S8. 2D  $^1\text{H}$ - $^1\text{H}$  COSY NMR spectrum of **3a** in  $\text{CDCl}_3$  at  $T = 233\text{ K}$ .

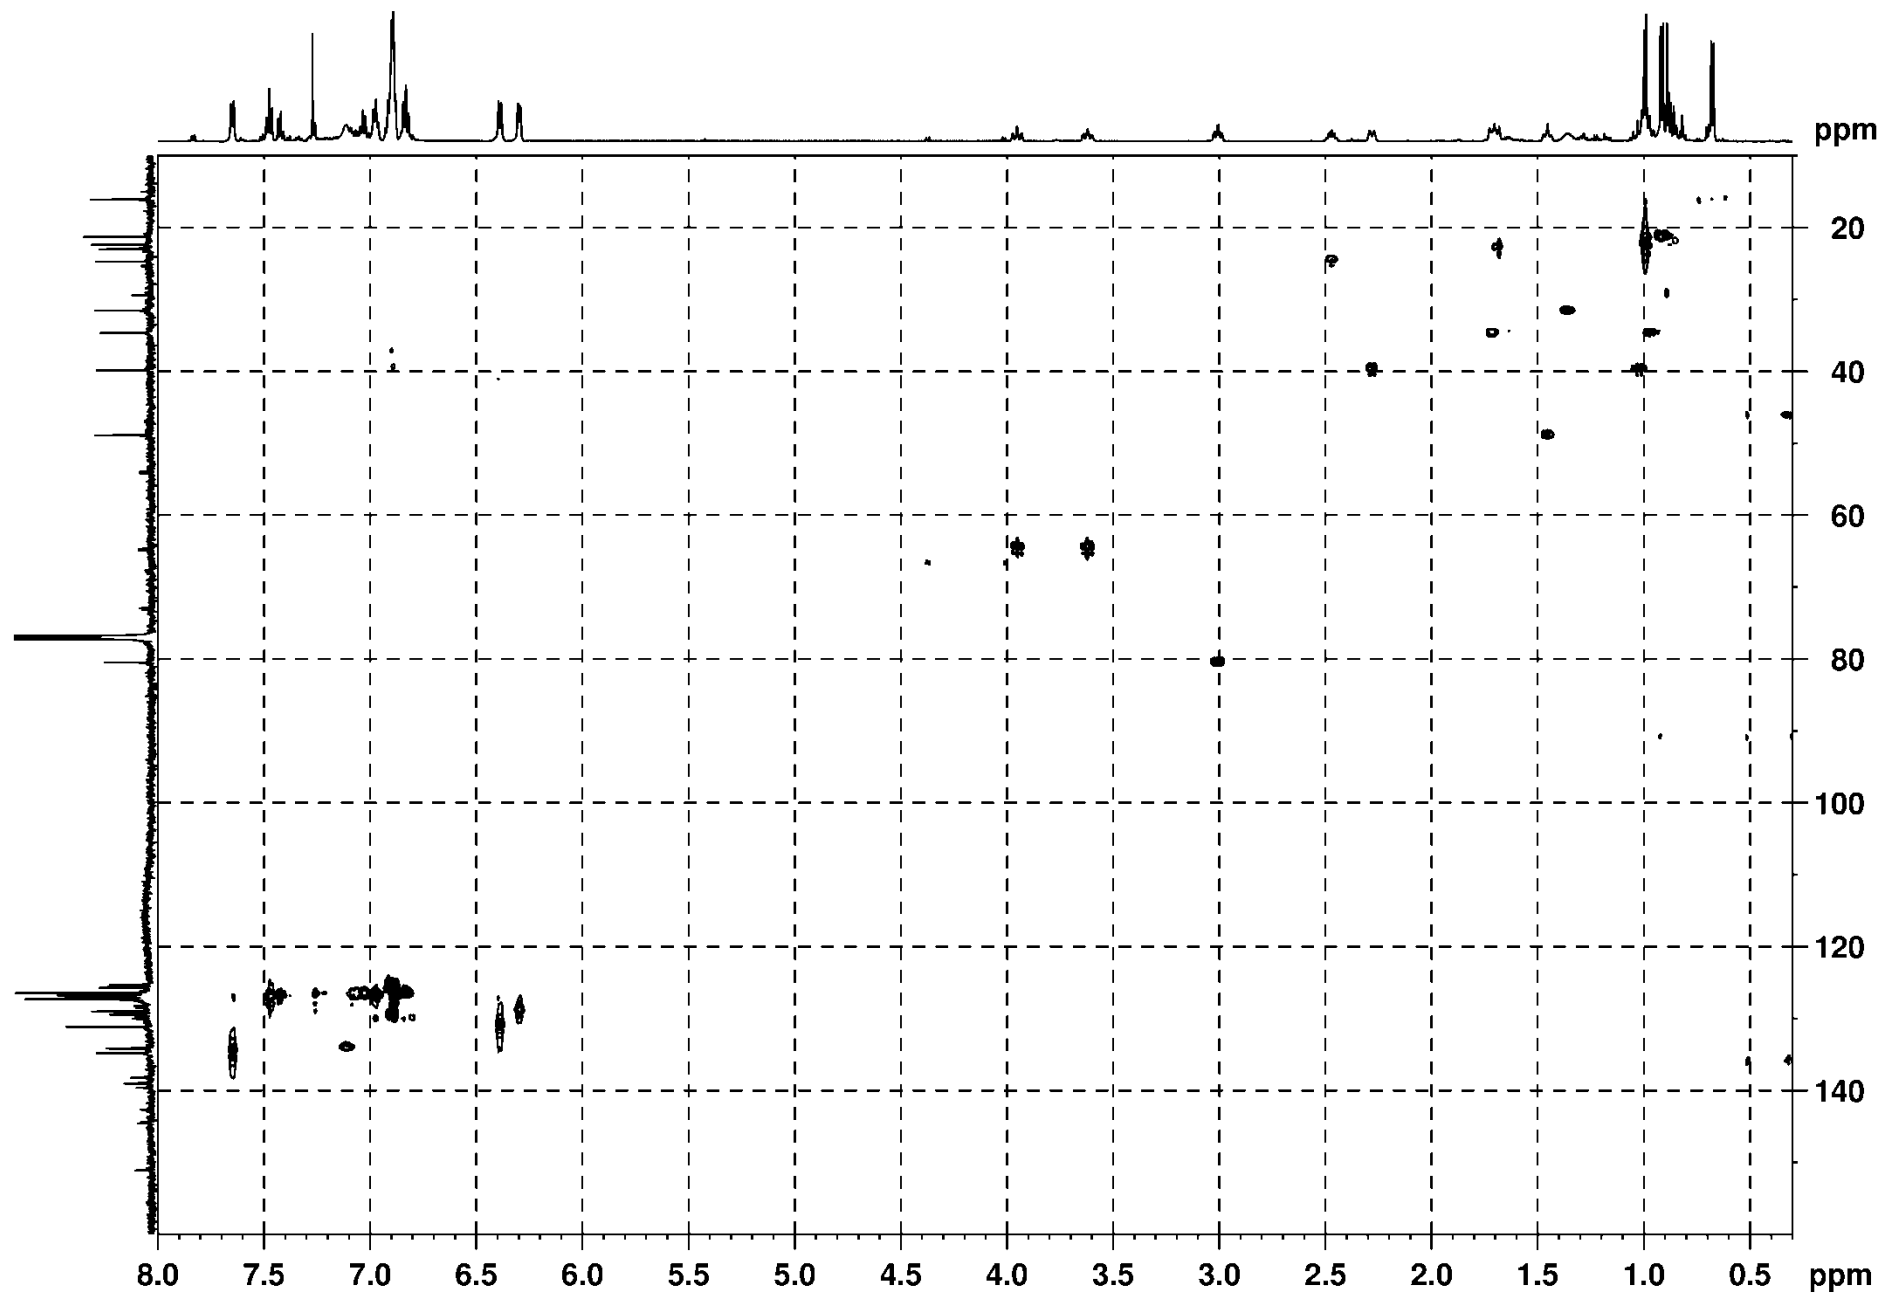

Figure S9. 2D  $^1\text{H}$ - $^{13}\text{C}$  HSQC NMR spectrum of **3a** in  $\text{CDCl}_3$  at  $T = 303$  K.

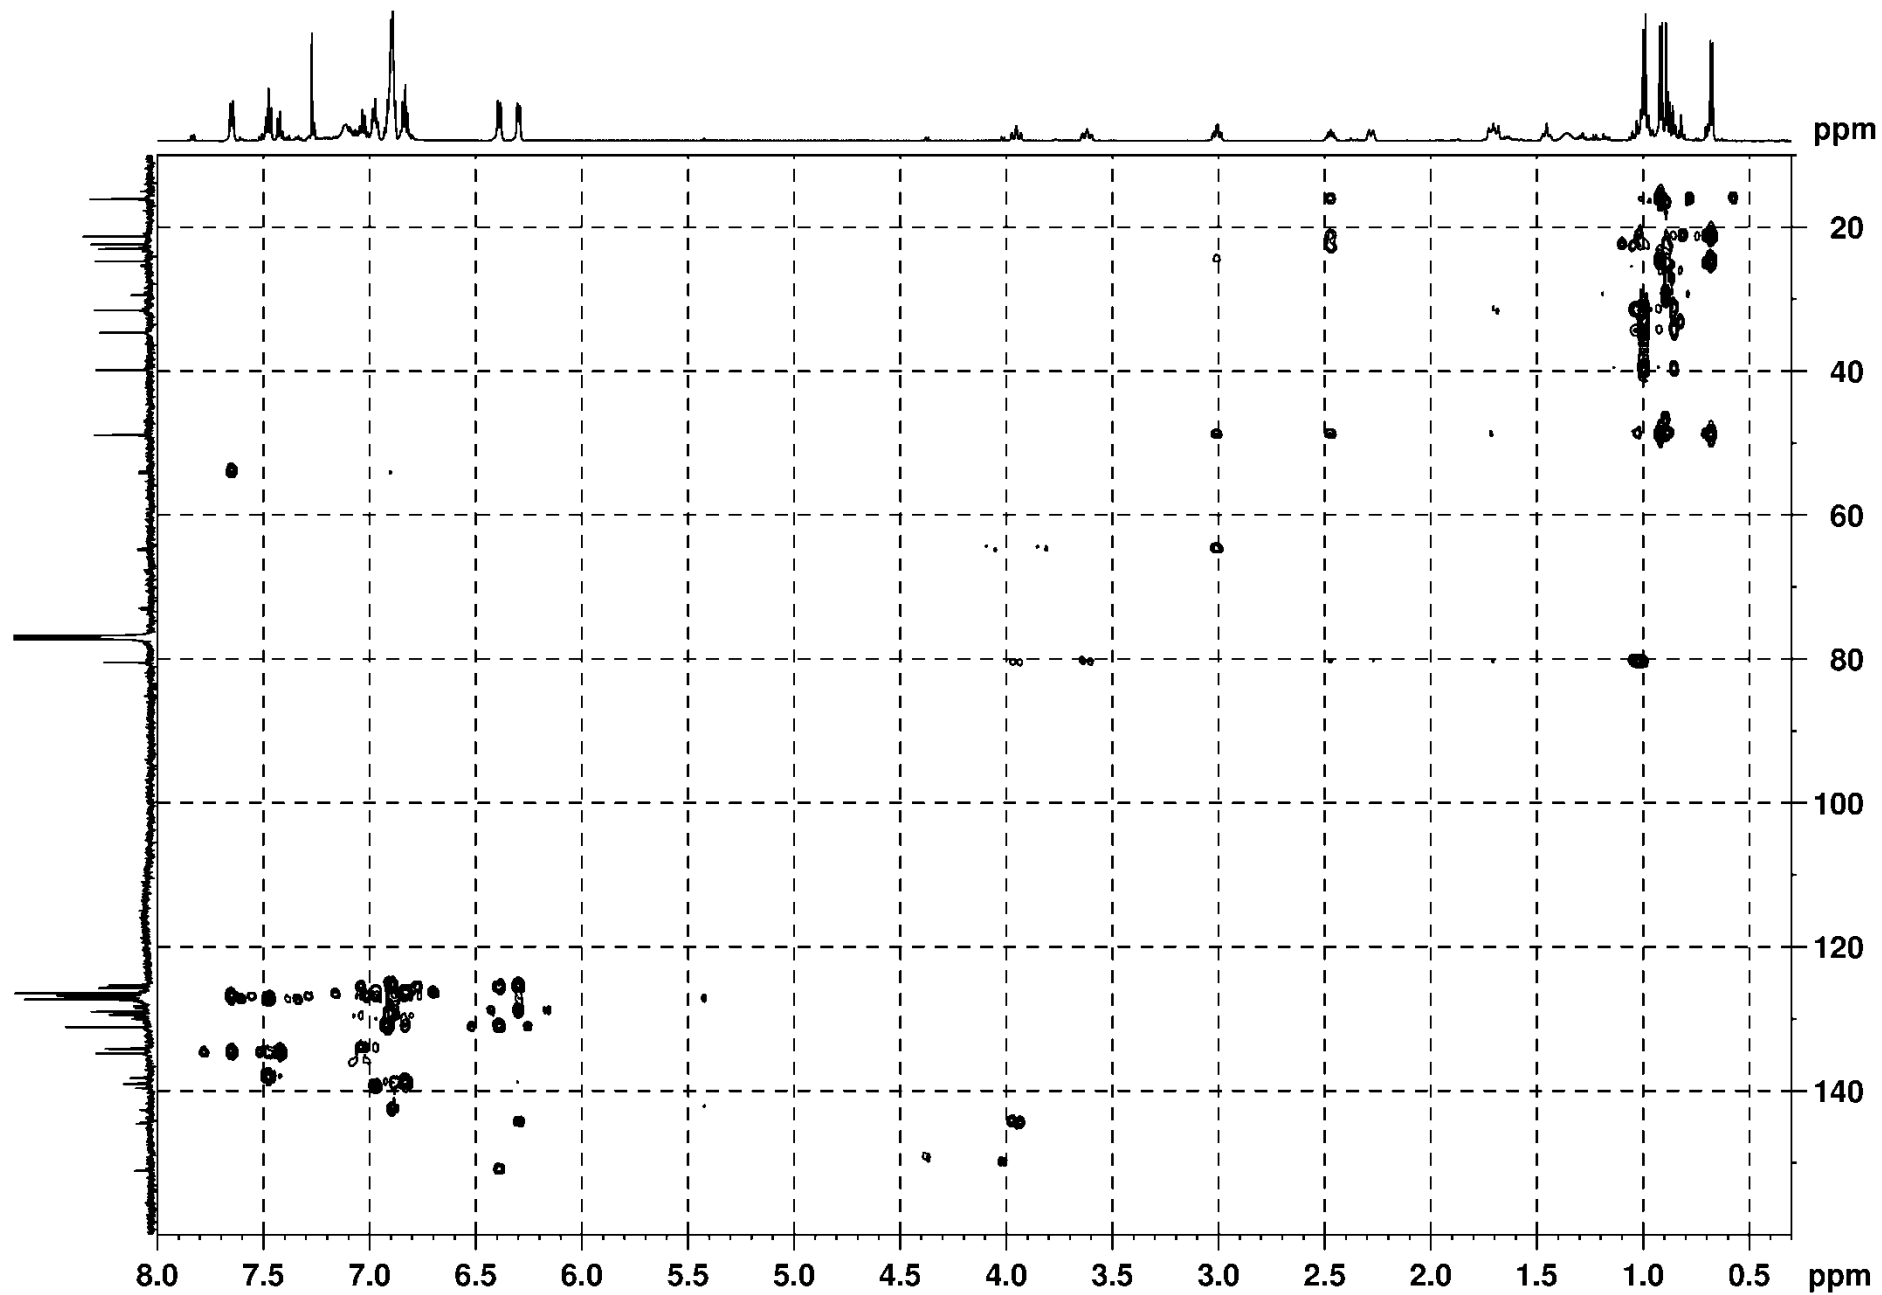

Figure S10. 2D  $^1\text{H}$ - $^{13}\text{C}$  HMBC NMR spectrum of **3a** in  $\text{CDCl}_3$  at  $T = 303$  K.

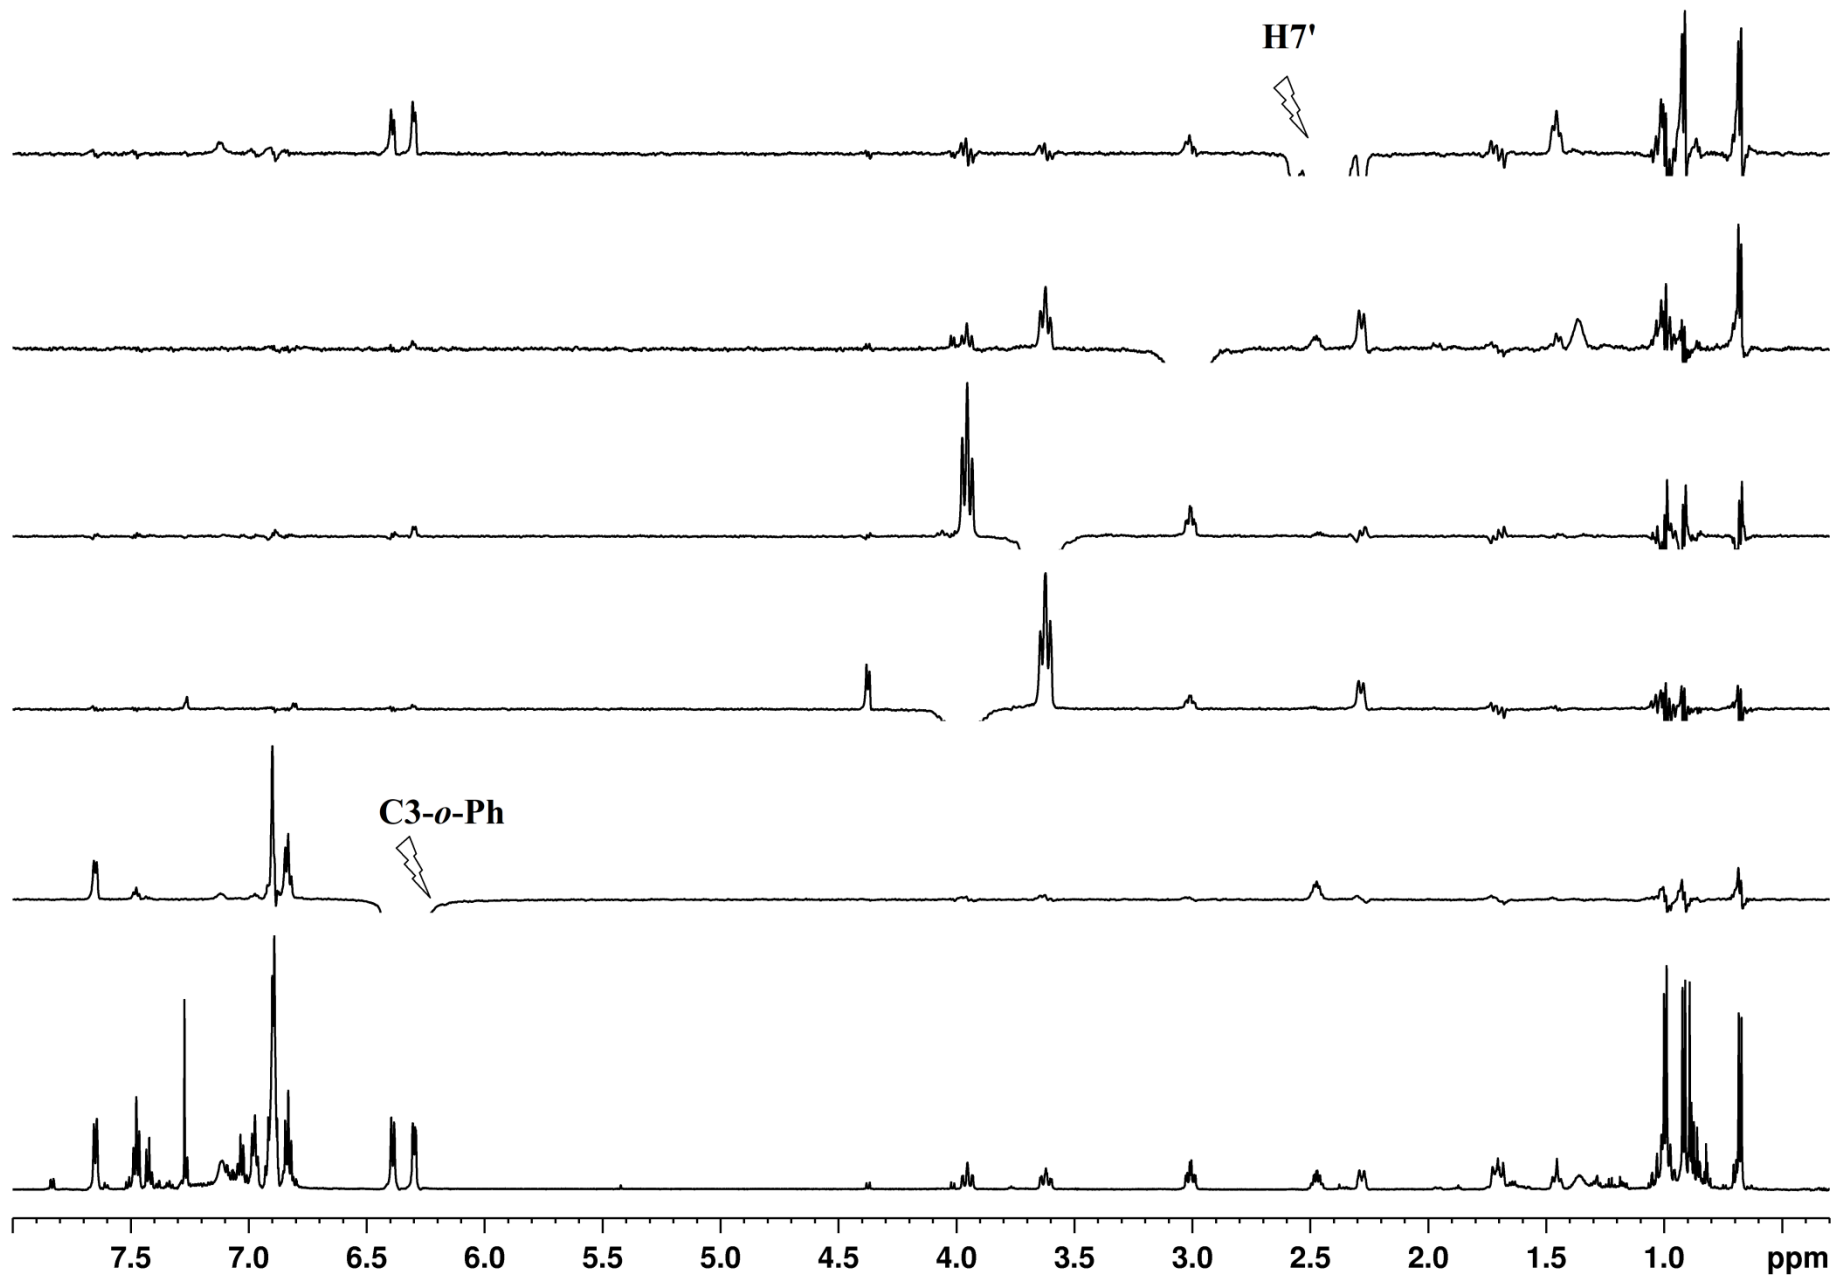

**Figure S11.** 1D  $^1\text{H}$  and  $^1\text{H}$  NOESY NMR spectra of **3a** in  $\text{CDCl}_3$  at  $T = 303 \text{ K}$ .

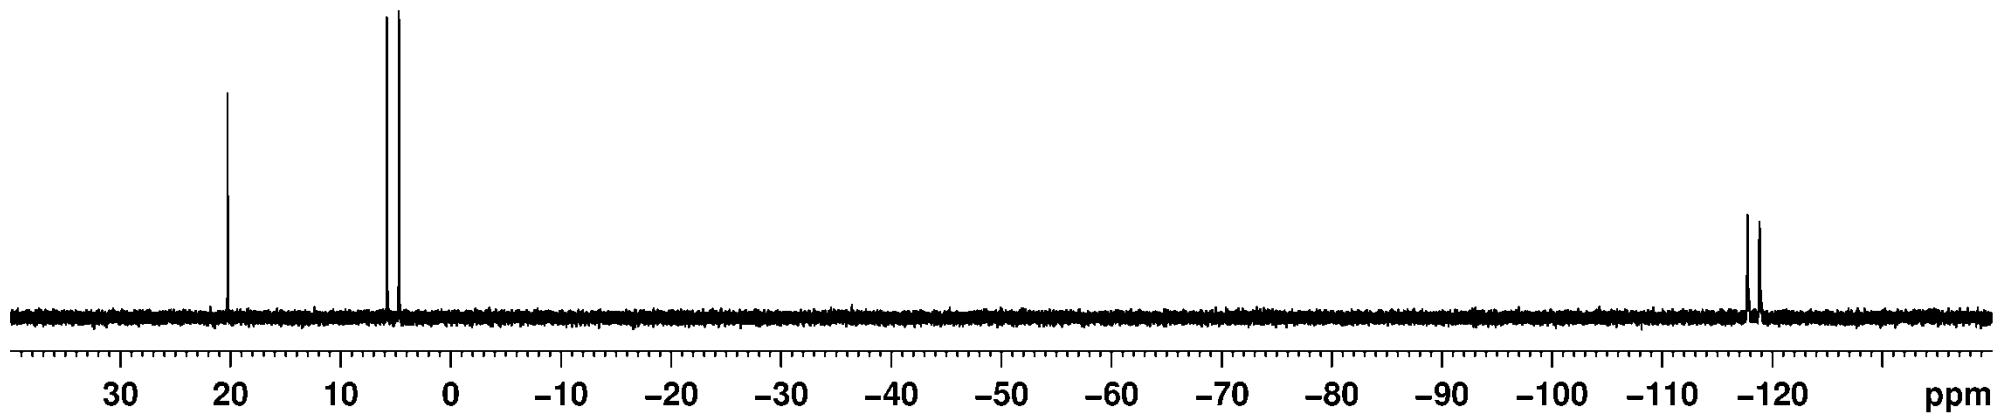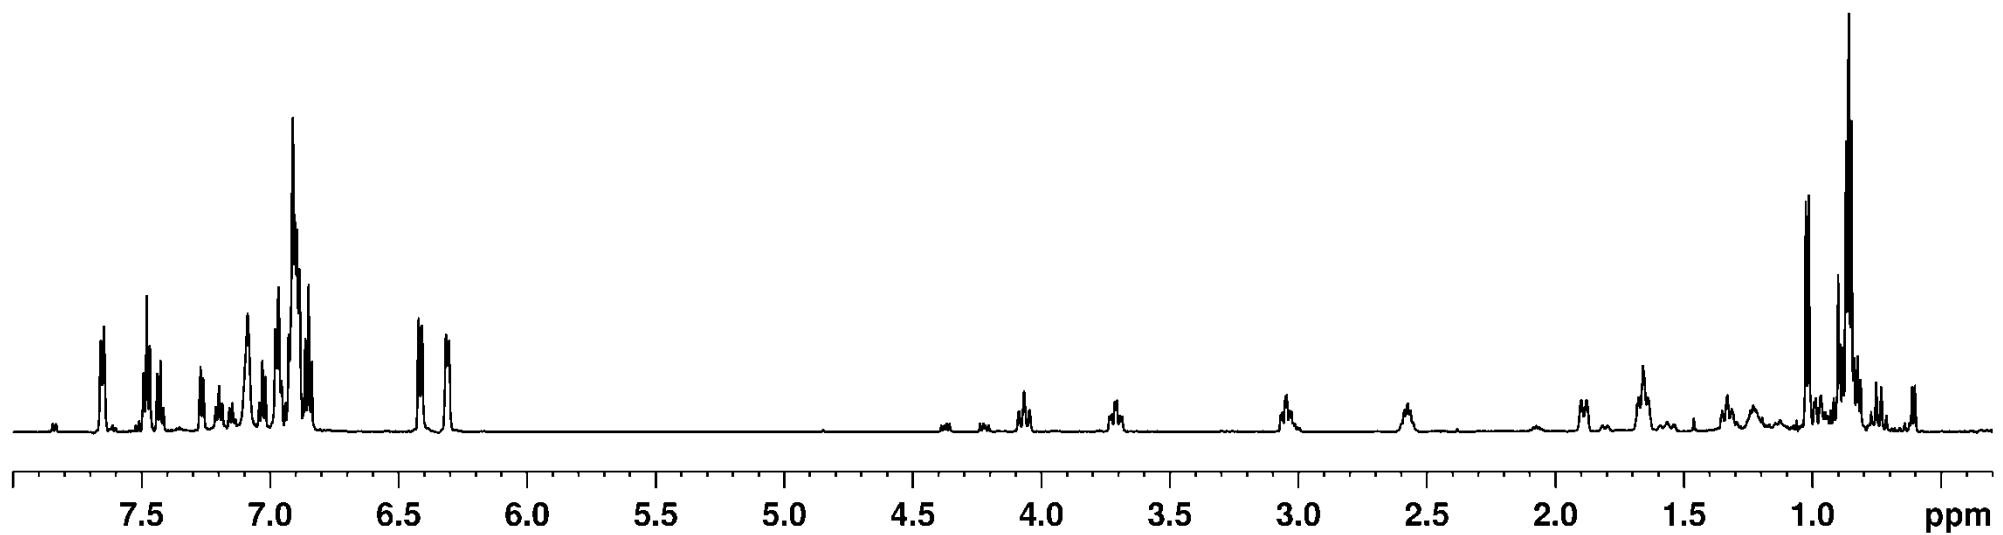

**Figure S12.** 1D  $^1\text{H}$  and  $^{31}\text{P}\{^1\text{H}\}$  NMR spectra of **3b** in  $\text{CDCl}_3$  at  $T = 303$  K.

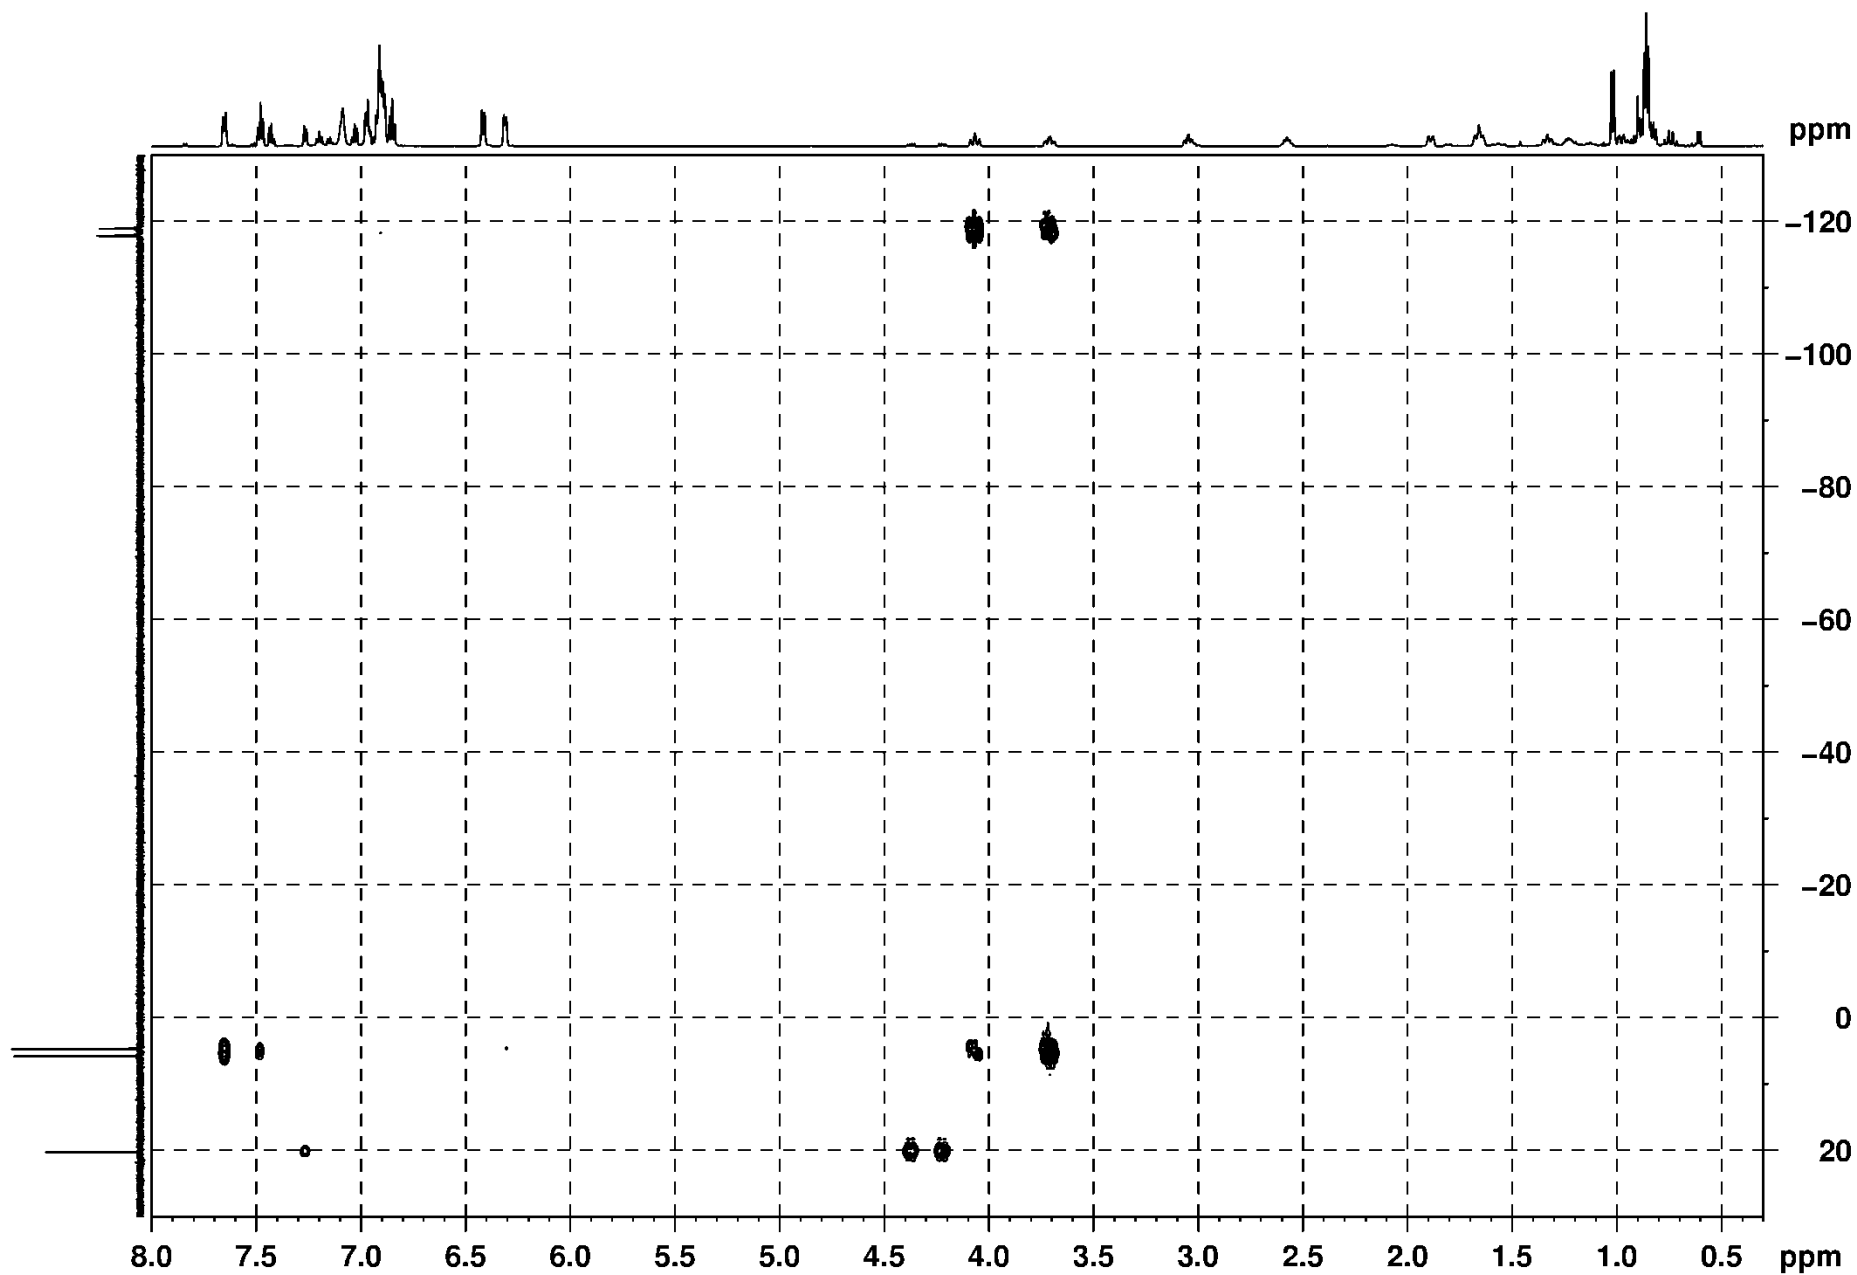

Figure S13. 2D  $^1\text{H}$ - $^{31}\text{P}$  HMBC NMR spectrum of **3b** in  $\text{CDCl}_3$  at  $T = 303$  K.



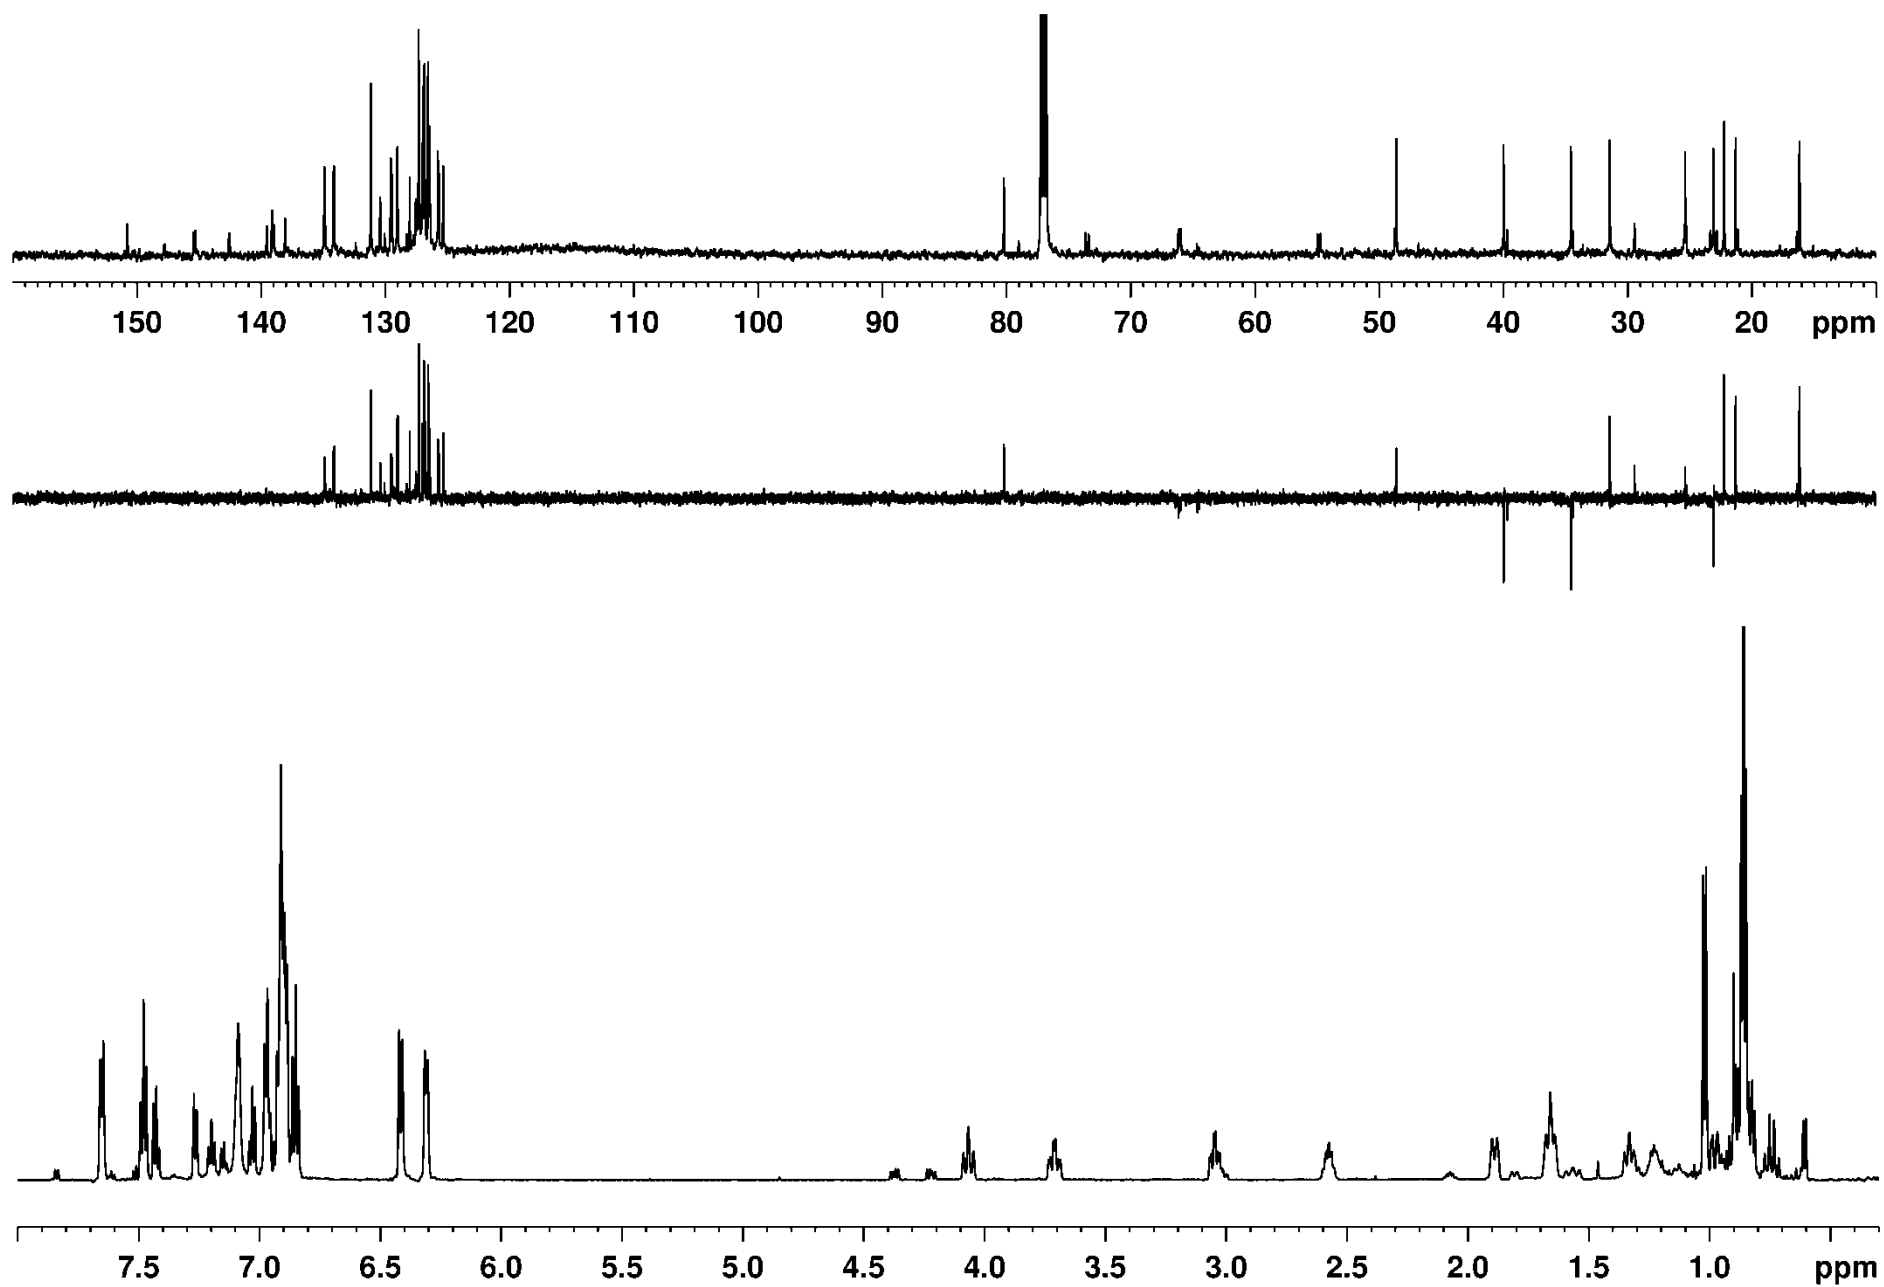

**Figure S14.** 1D <sup>1</sup>H, <sup>13</sup>C DEPT and <sup>13</sup>C{<sup>1</sup>H} NMR spectra of **3b** in CDCl<sub>3</sub> at T = 303 K.

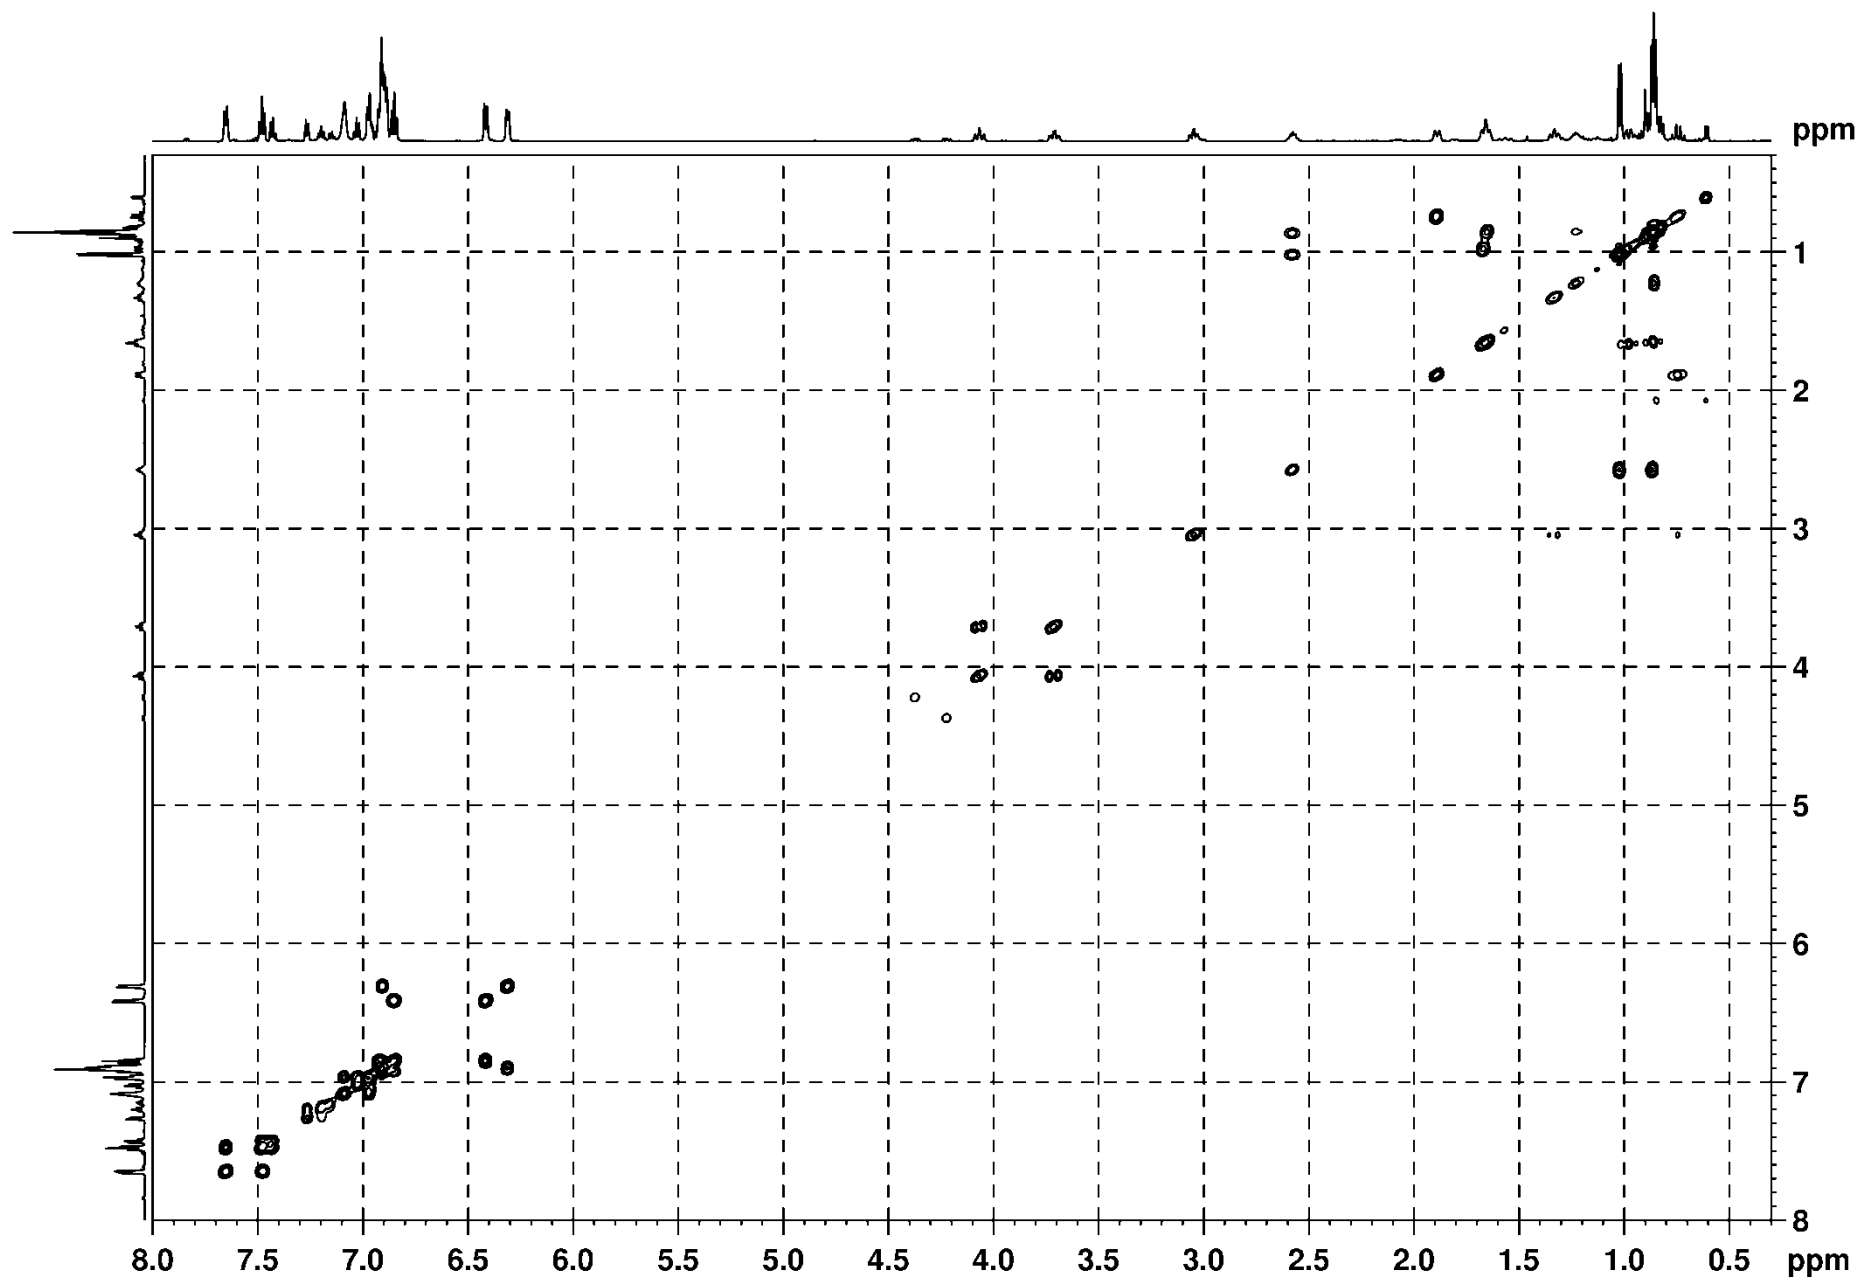

Figure S15. 2D  $^1\text{H}$ - $^1\text{H}$  COSY NMR spectrum of **3b** in  $\text{CDCl}_3$  at  $T = 303$  K.

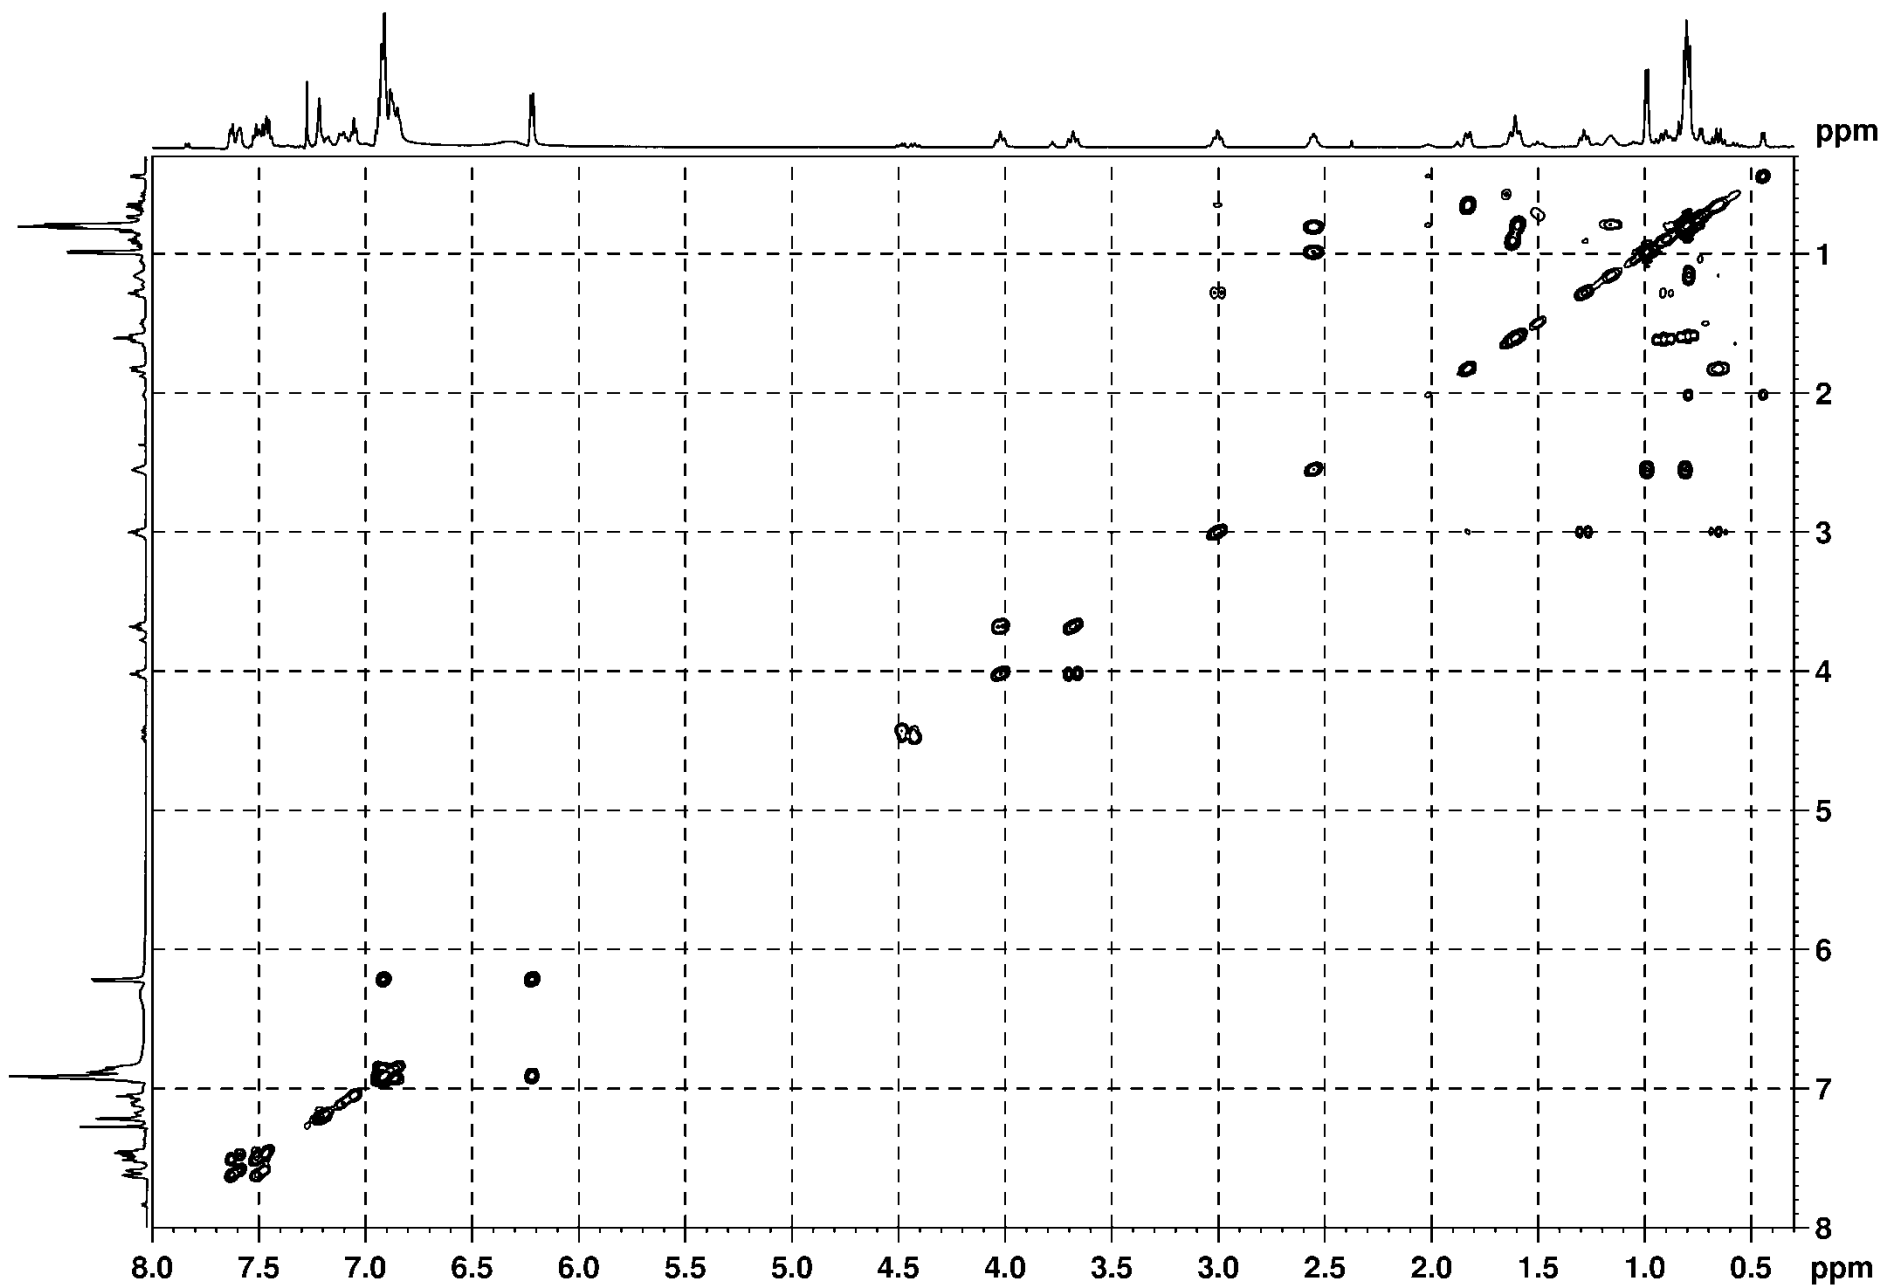

Figure S16. 2D  $^1\text{H}$ - $^1\text{H}$  COSY NMR spectrum of **3b** in  $\text{CDCl}_3$  at  $T = 233\text{ K}$ .

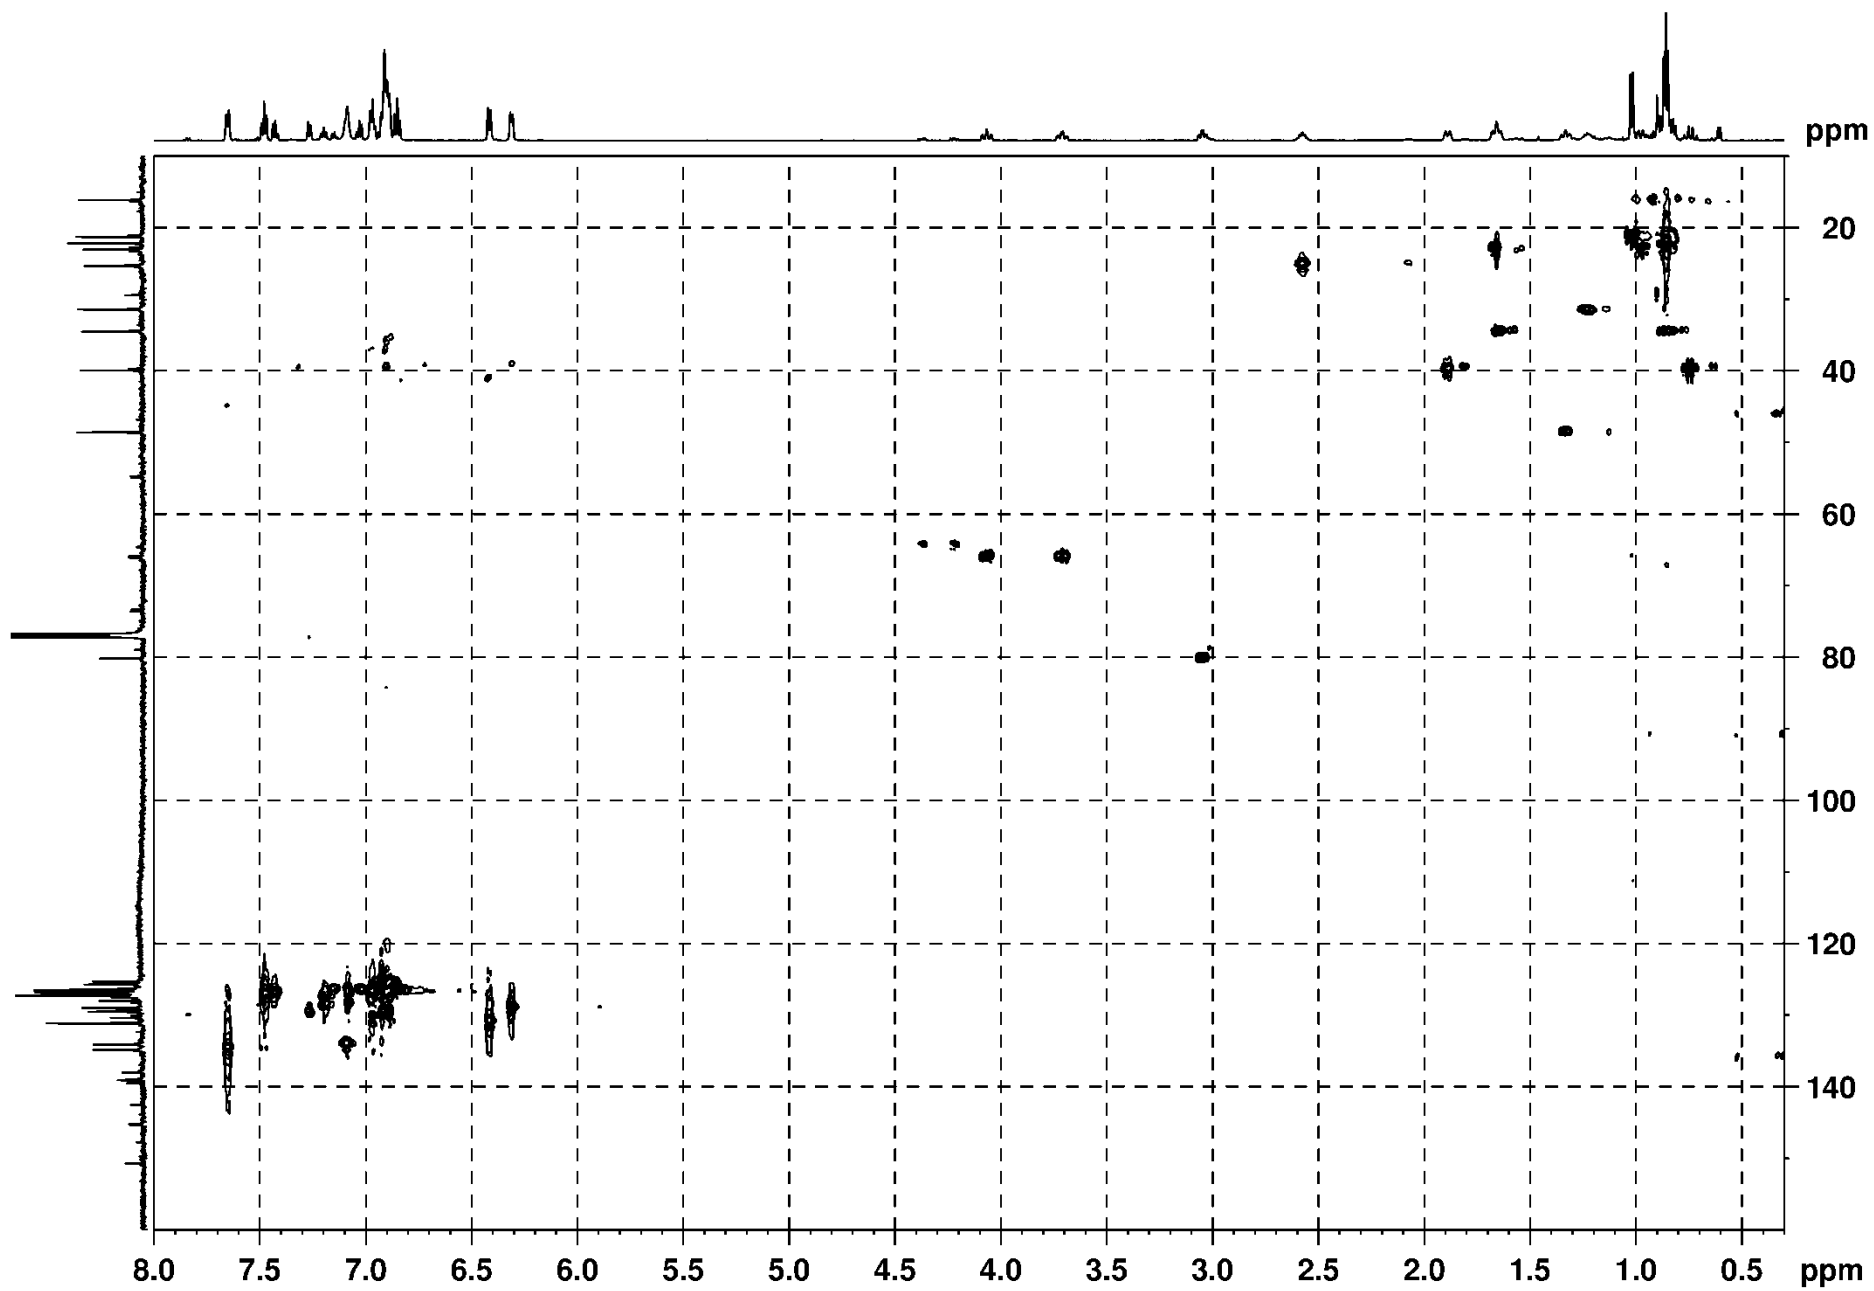

Figure S17. 2D  $^1\text{H}$ - $^{13}\text{C}$  HSQC NMR spectrum of **3b** in  $\text{CDCl}_3$  at  $T = 303$  K.

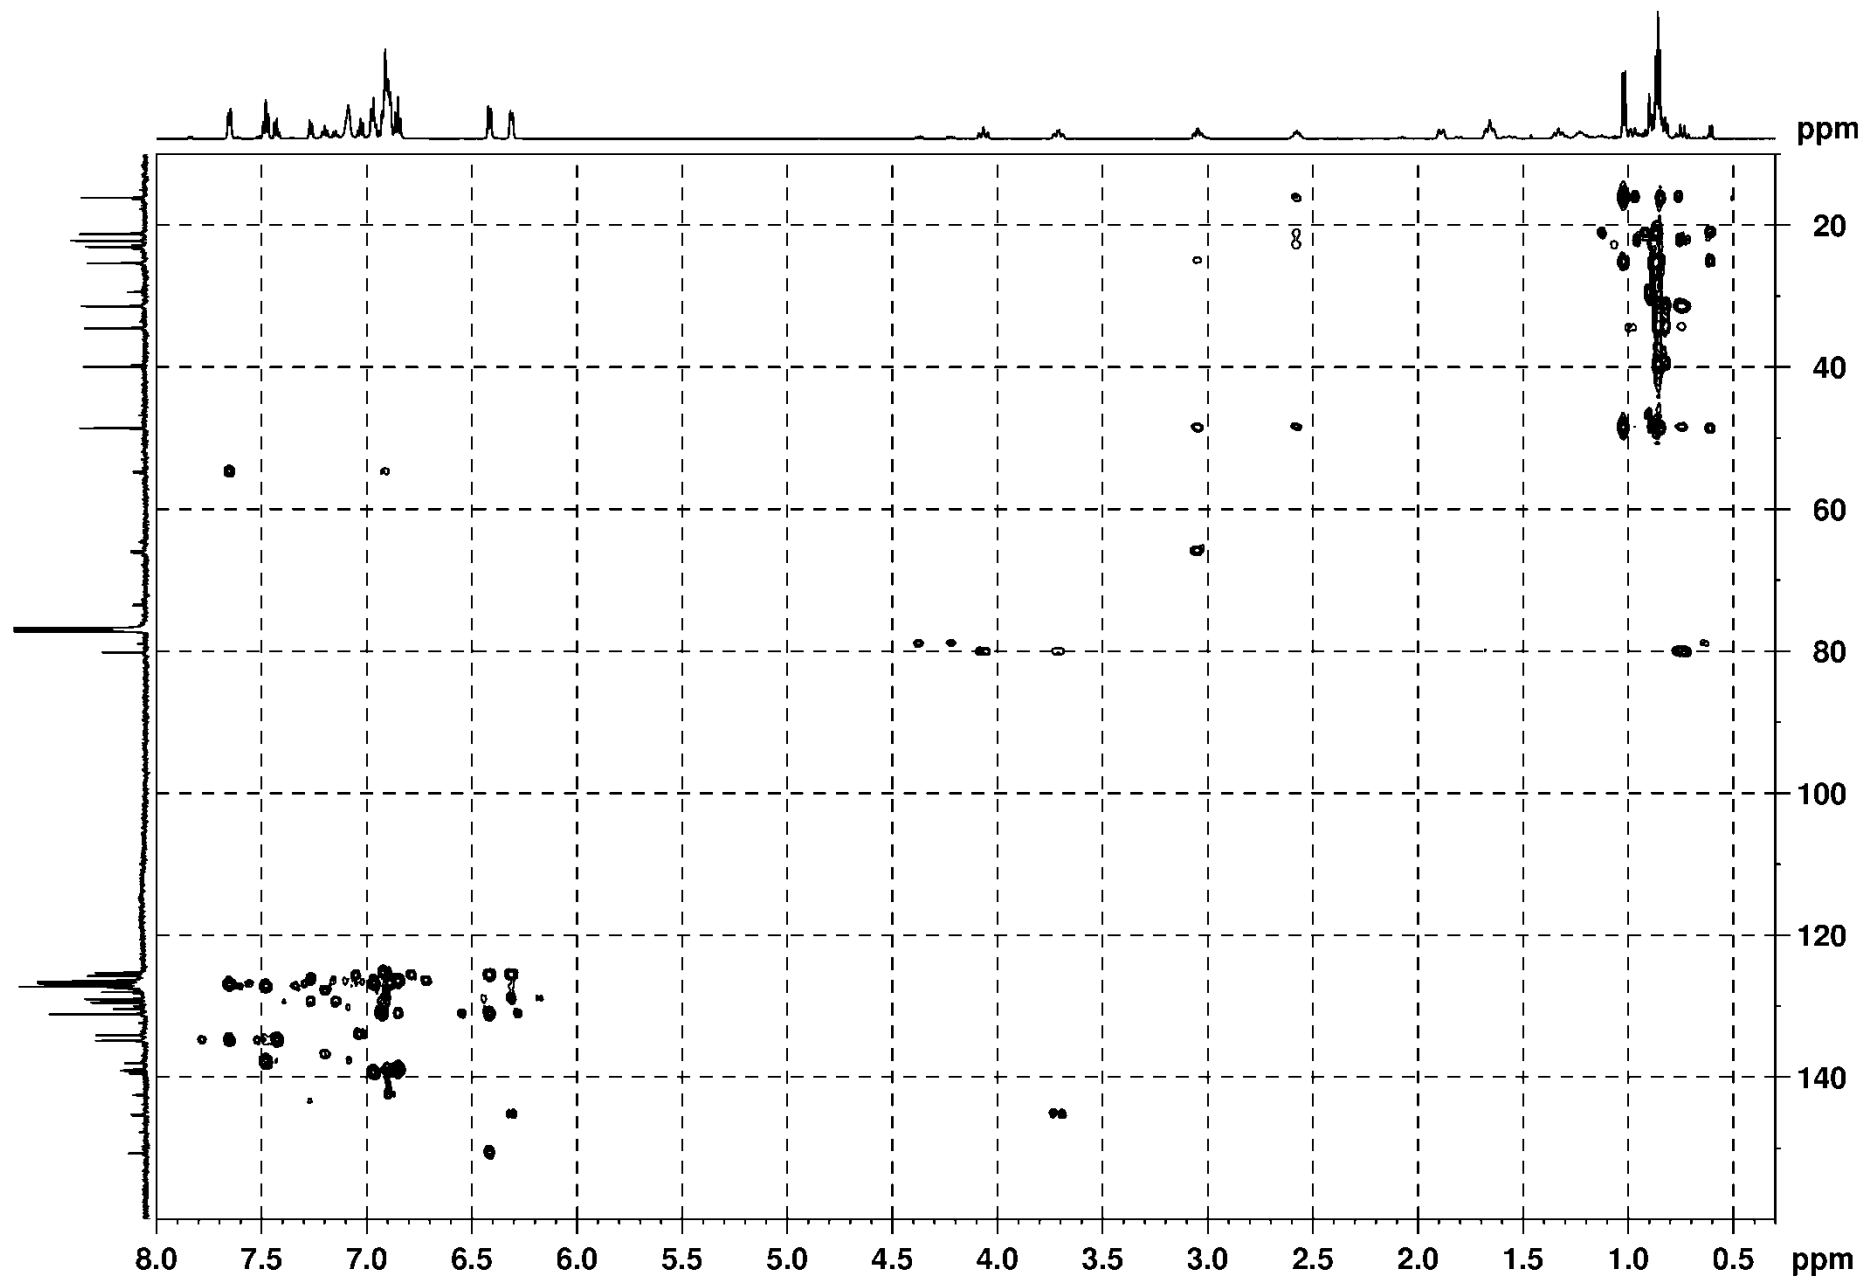

Figure S18. 2D  $^1\text{H}$ - $^{13}\text{C}$  HMBC NMR spectrum of **3b** in  $\text{CDCl}_3$  at  $T = 303$  K.

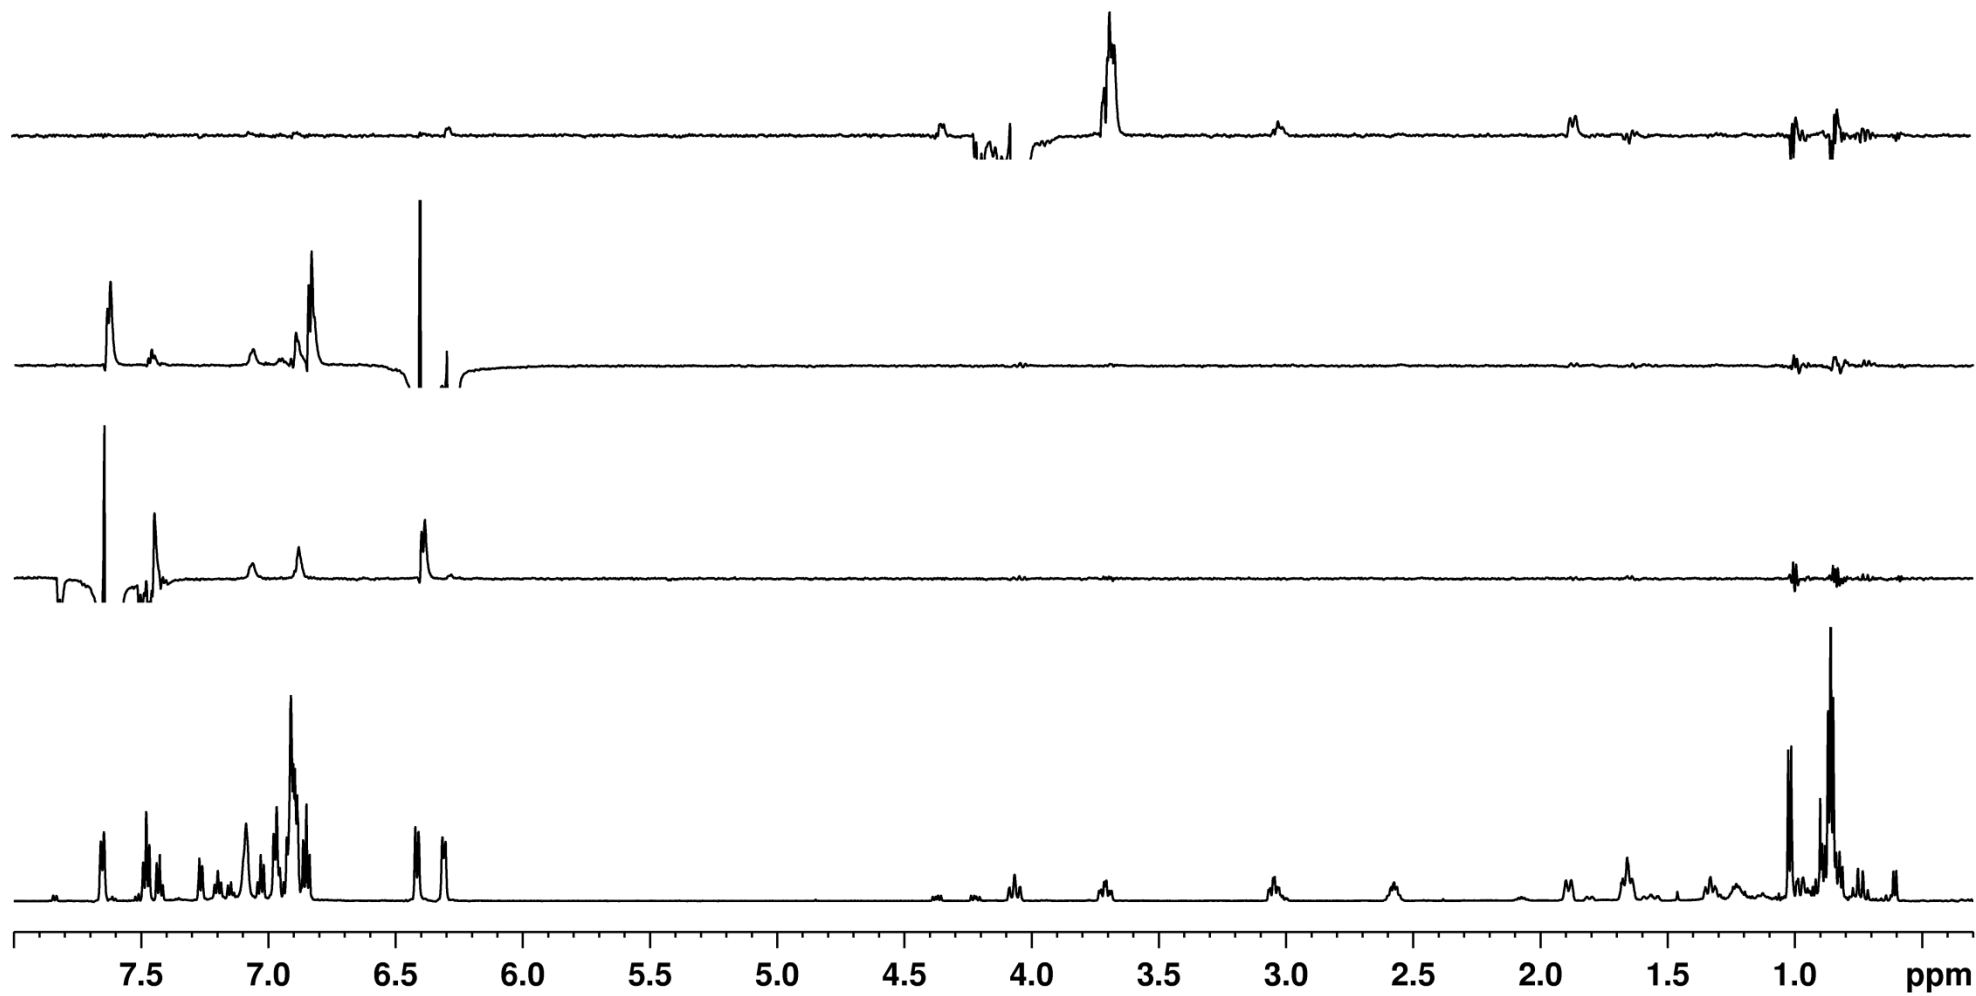

**Figure S19.** 1D  $^1\text{H}$  and  $^1\text{H}$  NOESY NMR spectra of **3b** in  $\text{CDCl}_3$  at  $T = 303 \text{ K}$ .

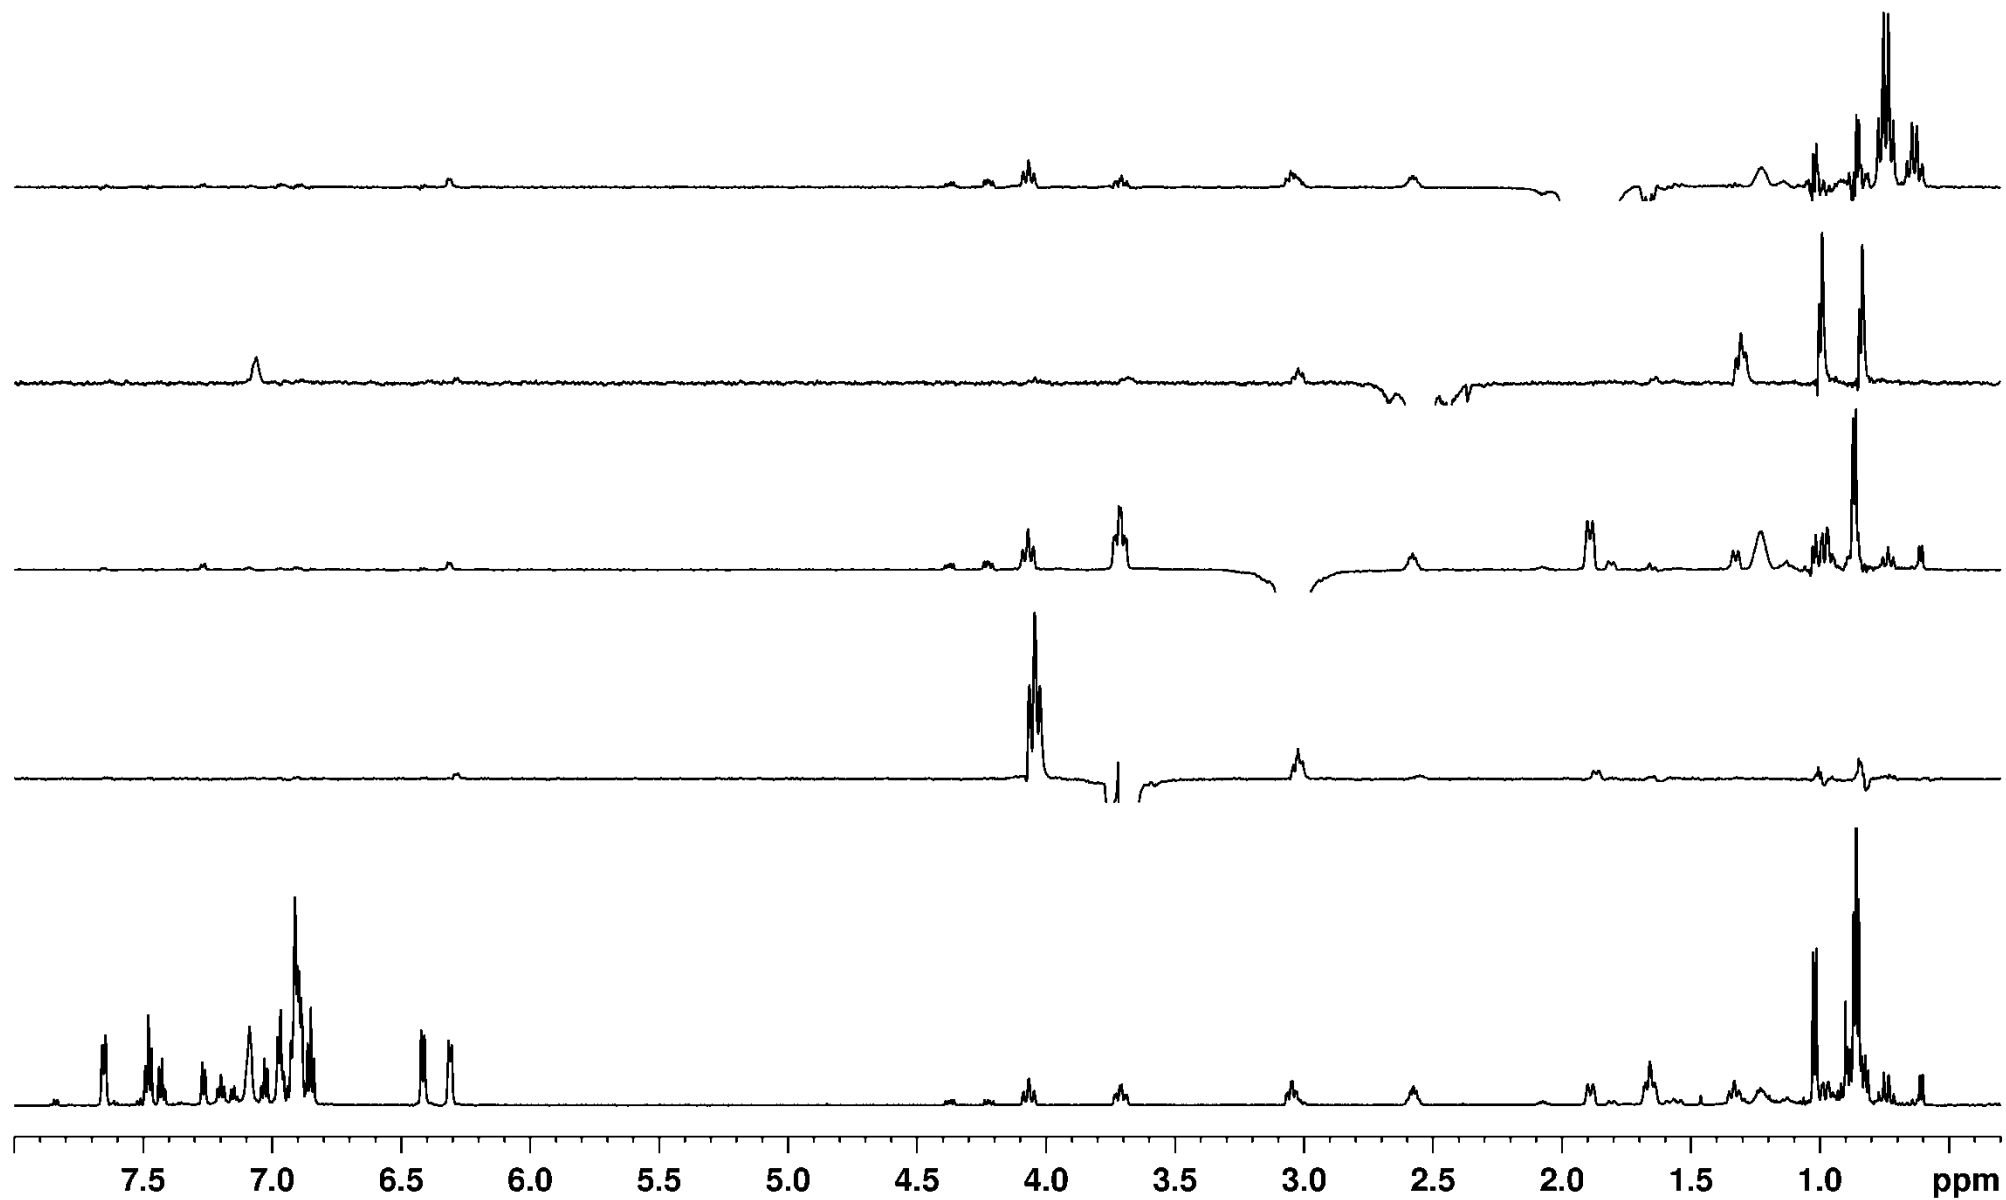

**Figure S20.** 1D <sup>1</sup>H and <sup>1</sup>H NOESY NMR spectra of **3b** in CDCl<sub>3</sub> at T = 303 K.

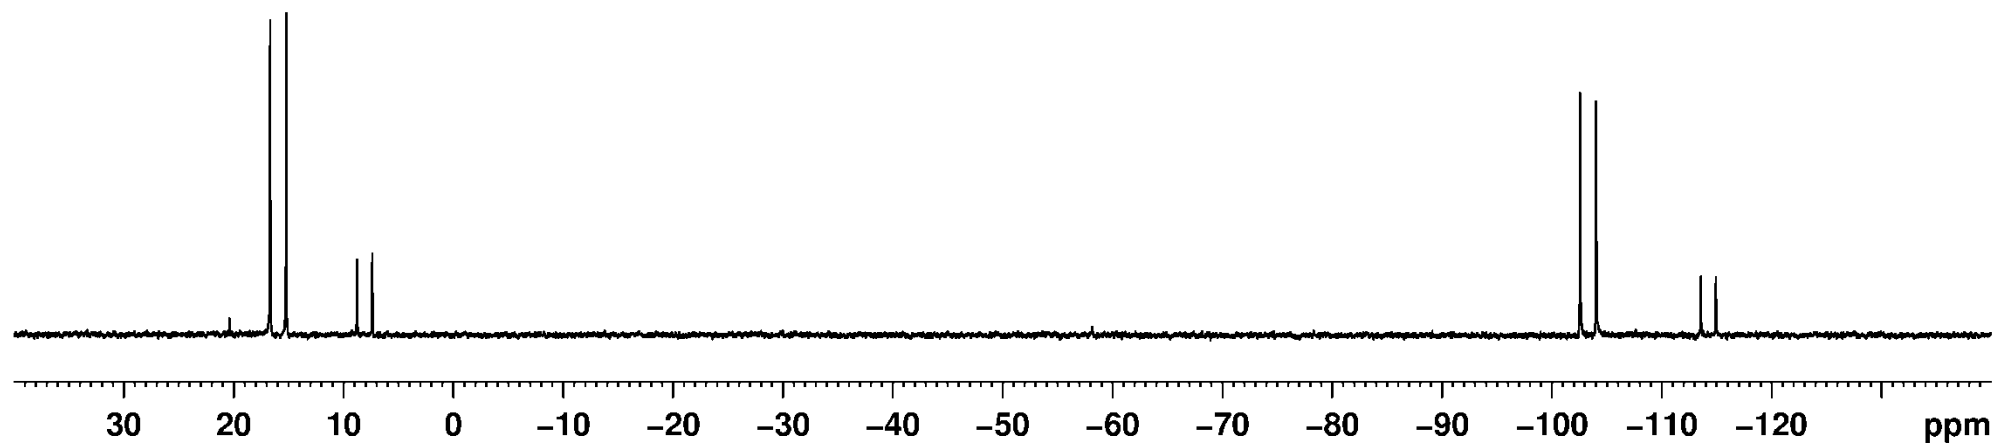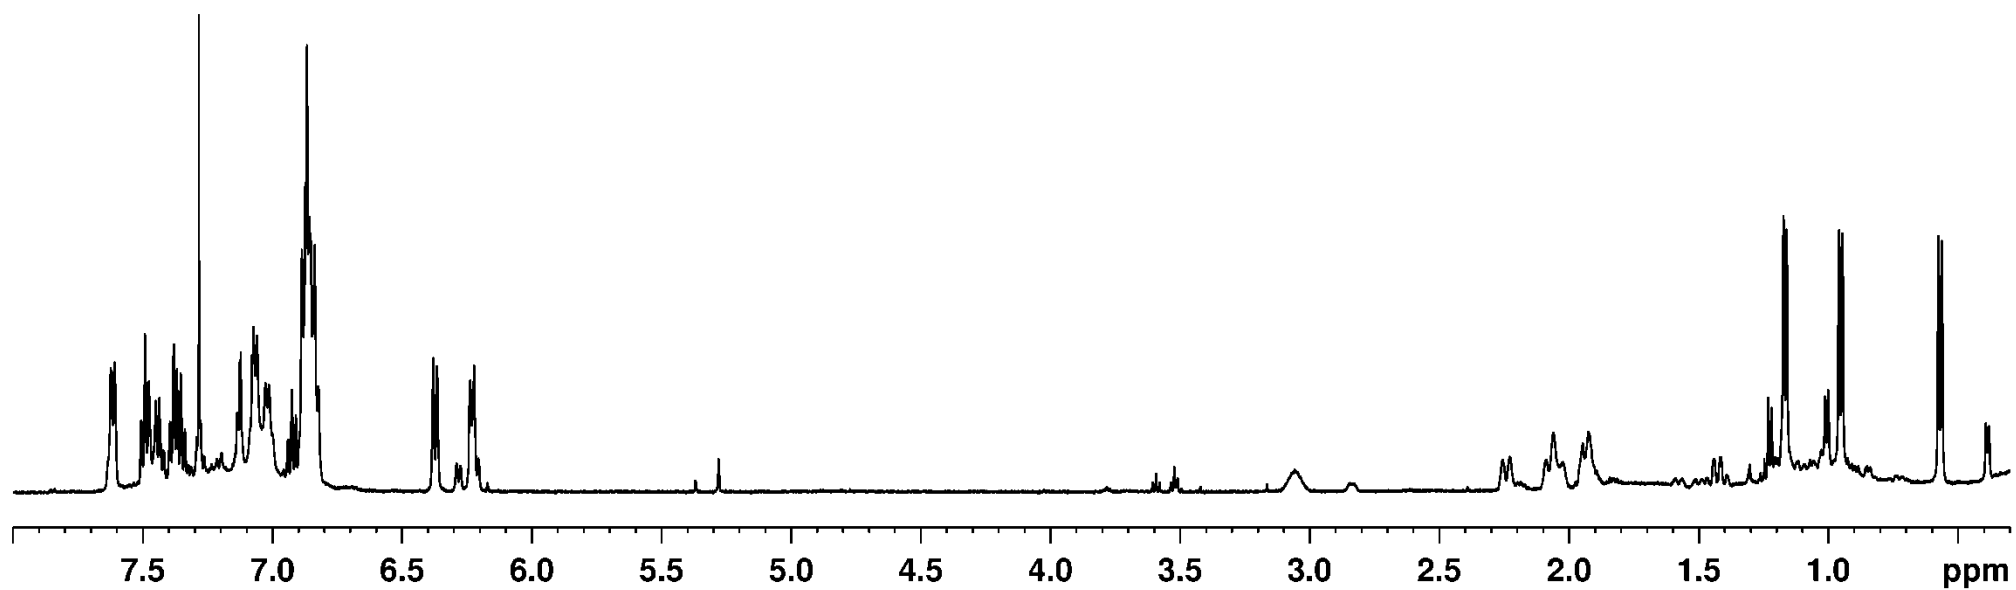

**Figure S21.** 1D  $^1\text{H}$  and  $^{31}\text{P}\{^1\text{H}\}$  NMR spectra of **5a** and **5b** in  $\text{CDCl}_3$  at  $T = 303\text{ K}$ .



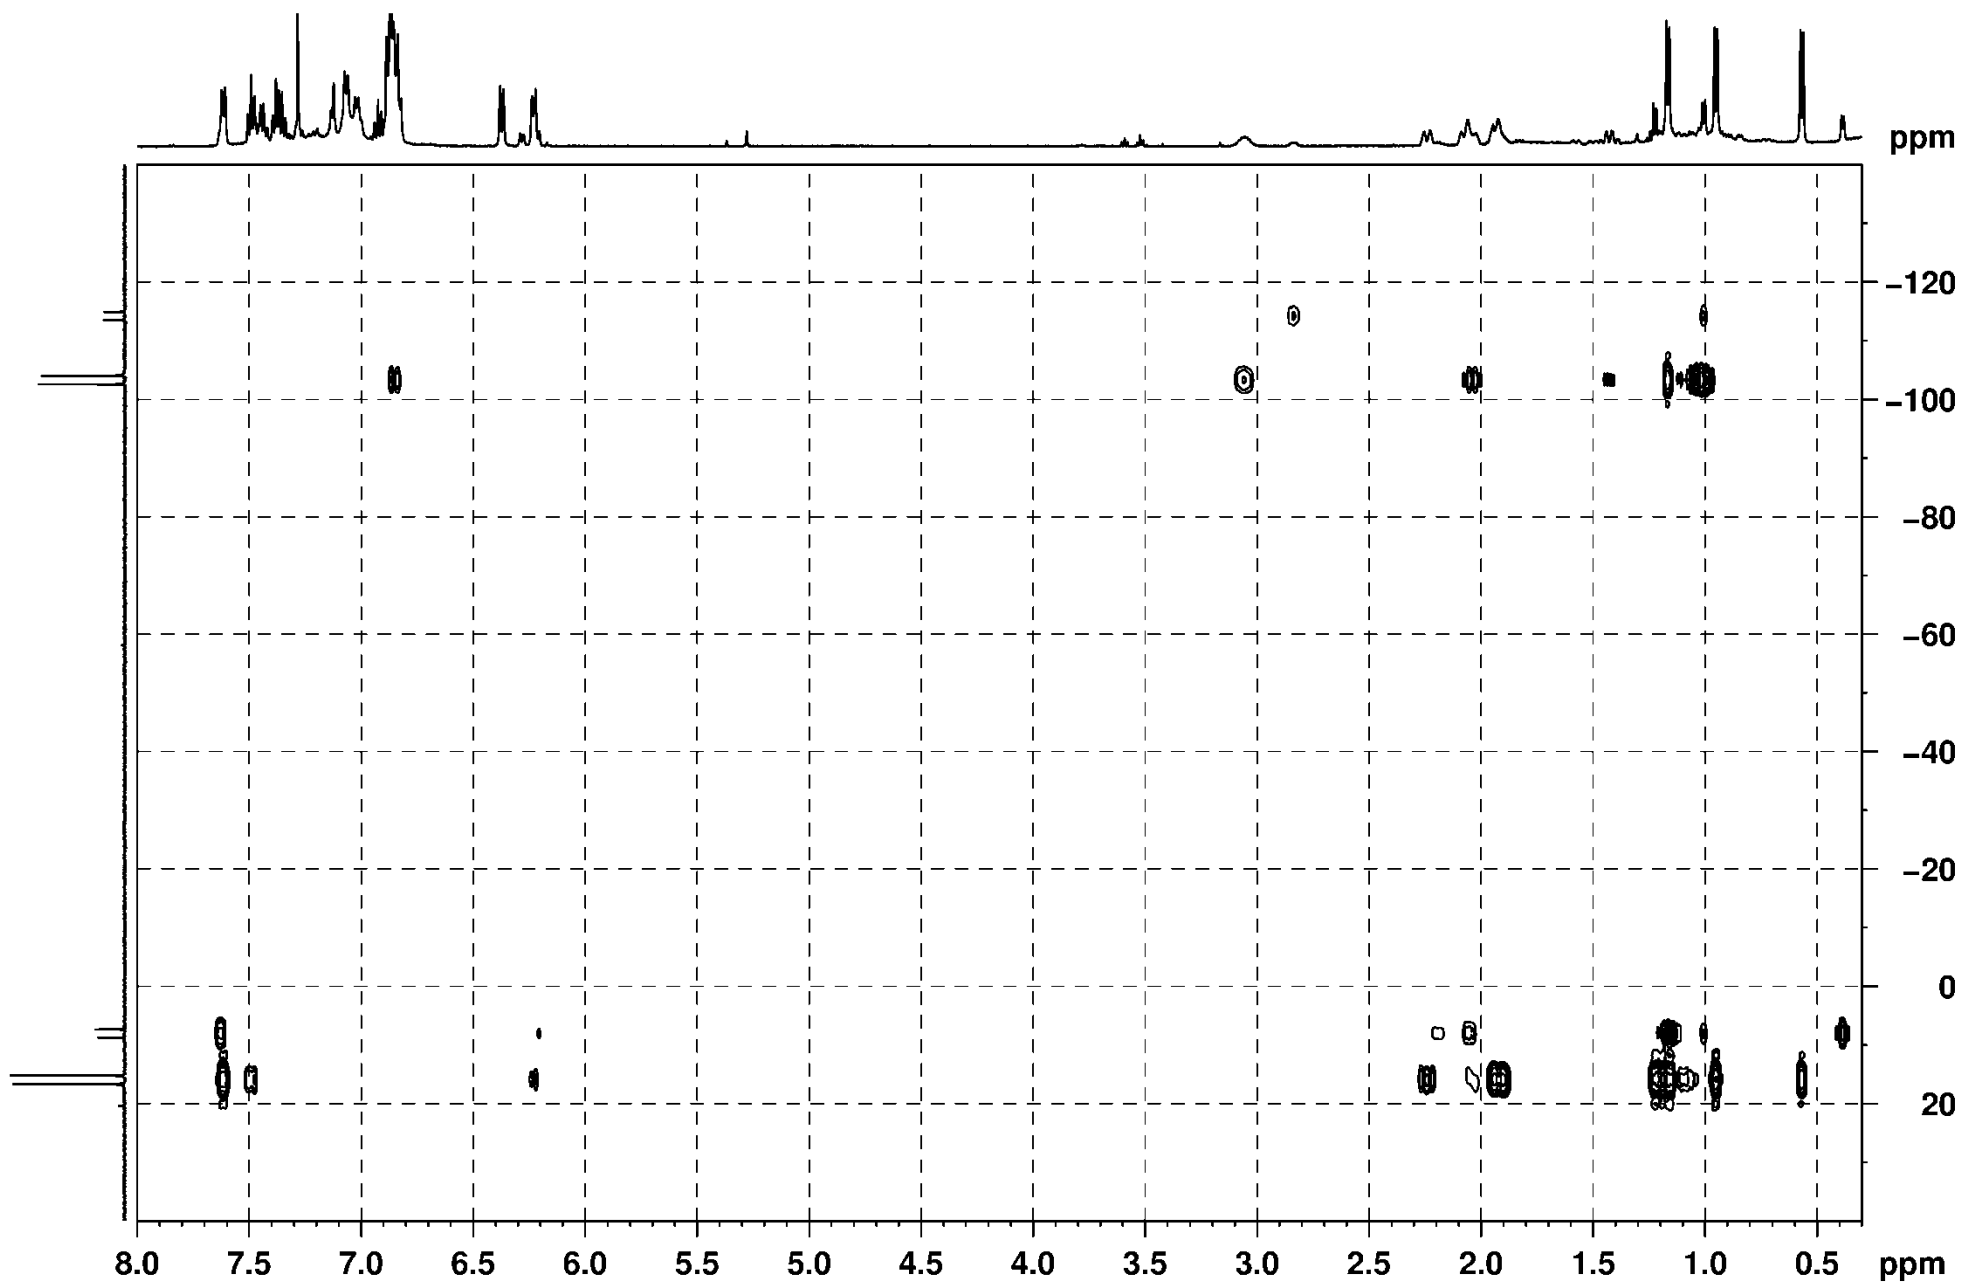

Figure S22. 2D  $^1\text{H}$ - $^{31}\text{P}$  HMBC NMR spectrum of **5a** and **5b** in  $\text{CDCl}_3$  at  $T = 303$  K.

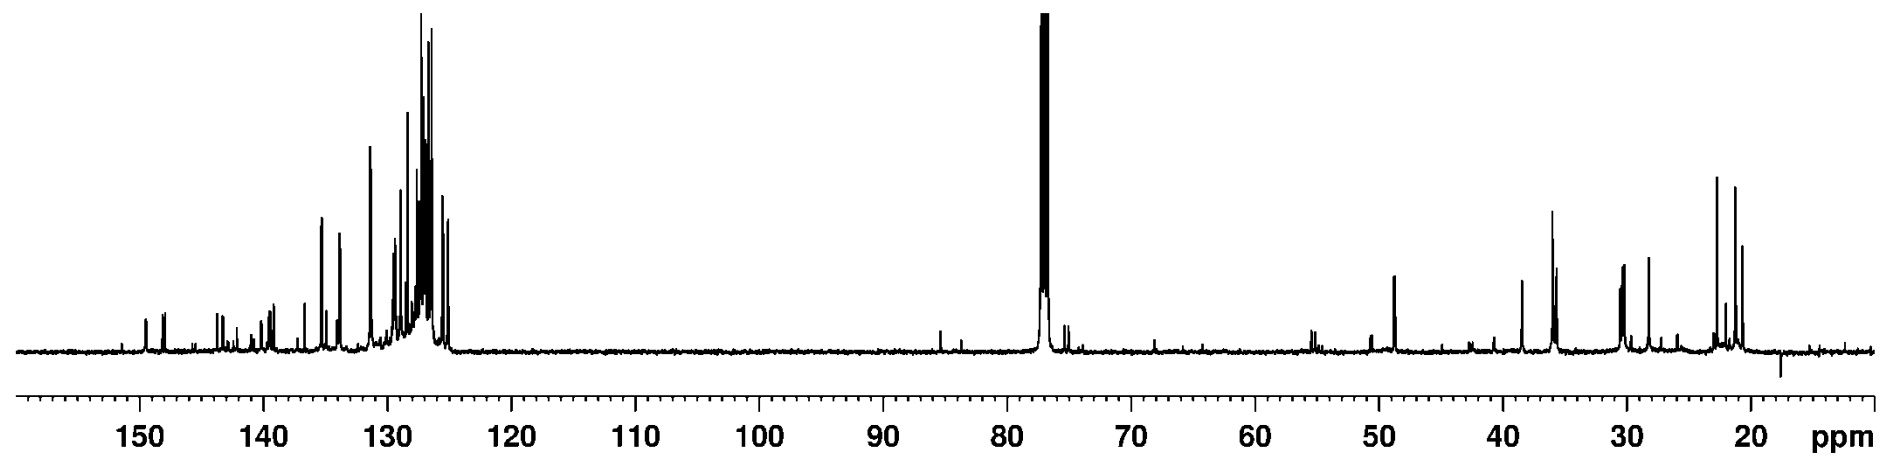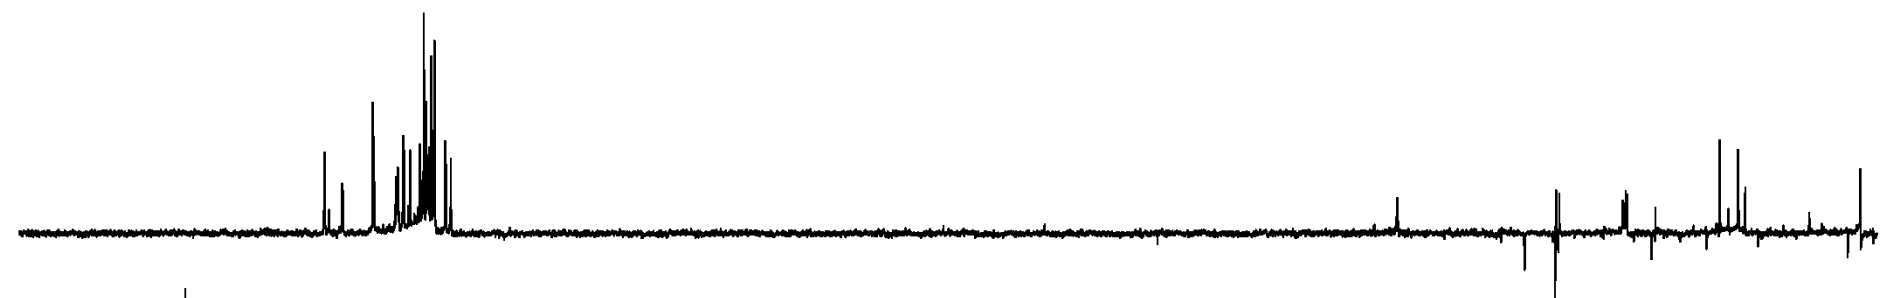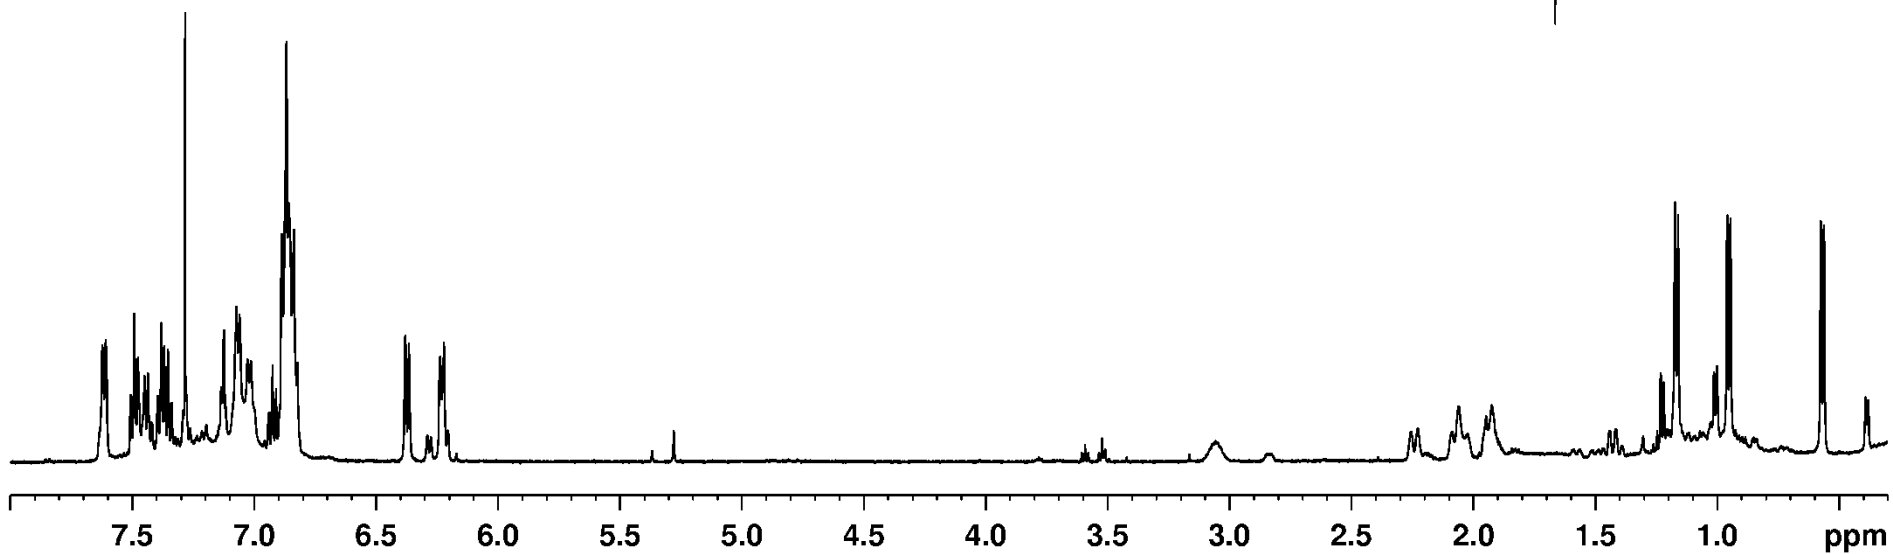

**Figure S23.** 1D  $^1\text{H}$ ,  $^{13}\text{C}$  DEPT and  $^{13}\text{C}\{^1\text{H}\}$  NMR spectra of **5a** and **5b** in  $\text{CDCl}_3$  at  $T = 303$  K.

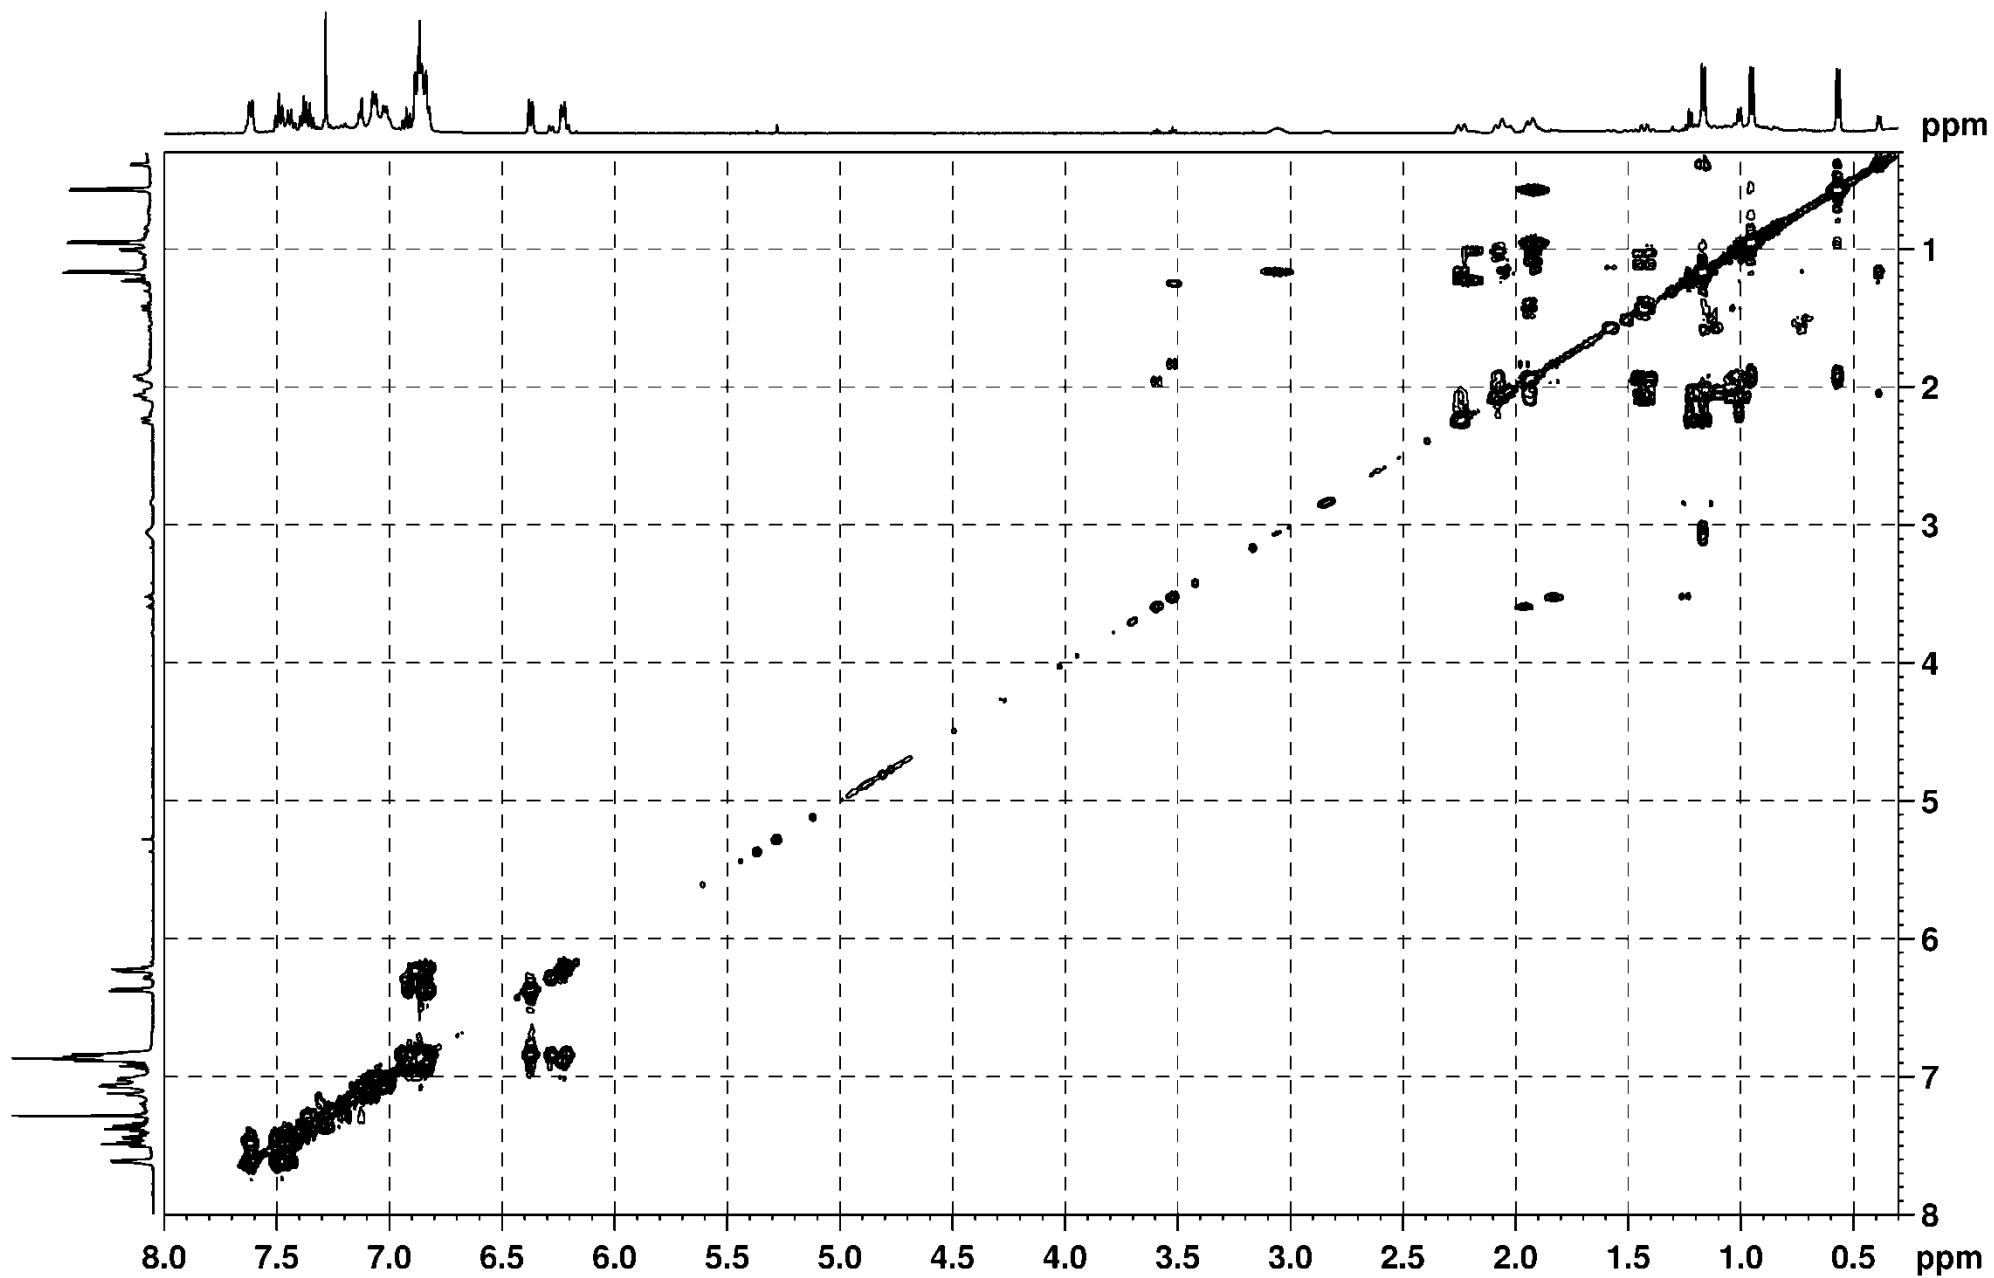

Figure S24. 2D  $^1\text{H}$ - $^1\text{H}$  COSY NMR spectrum of **5a** and **5b** in  $\text{CDCl}_3$  at  $T = 303$  K.

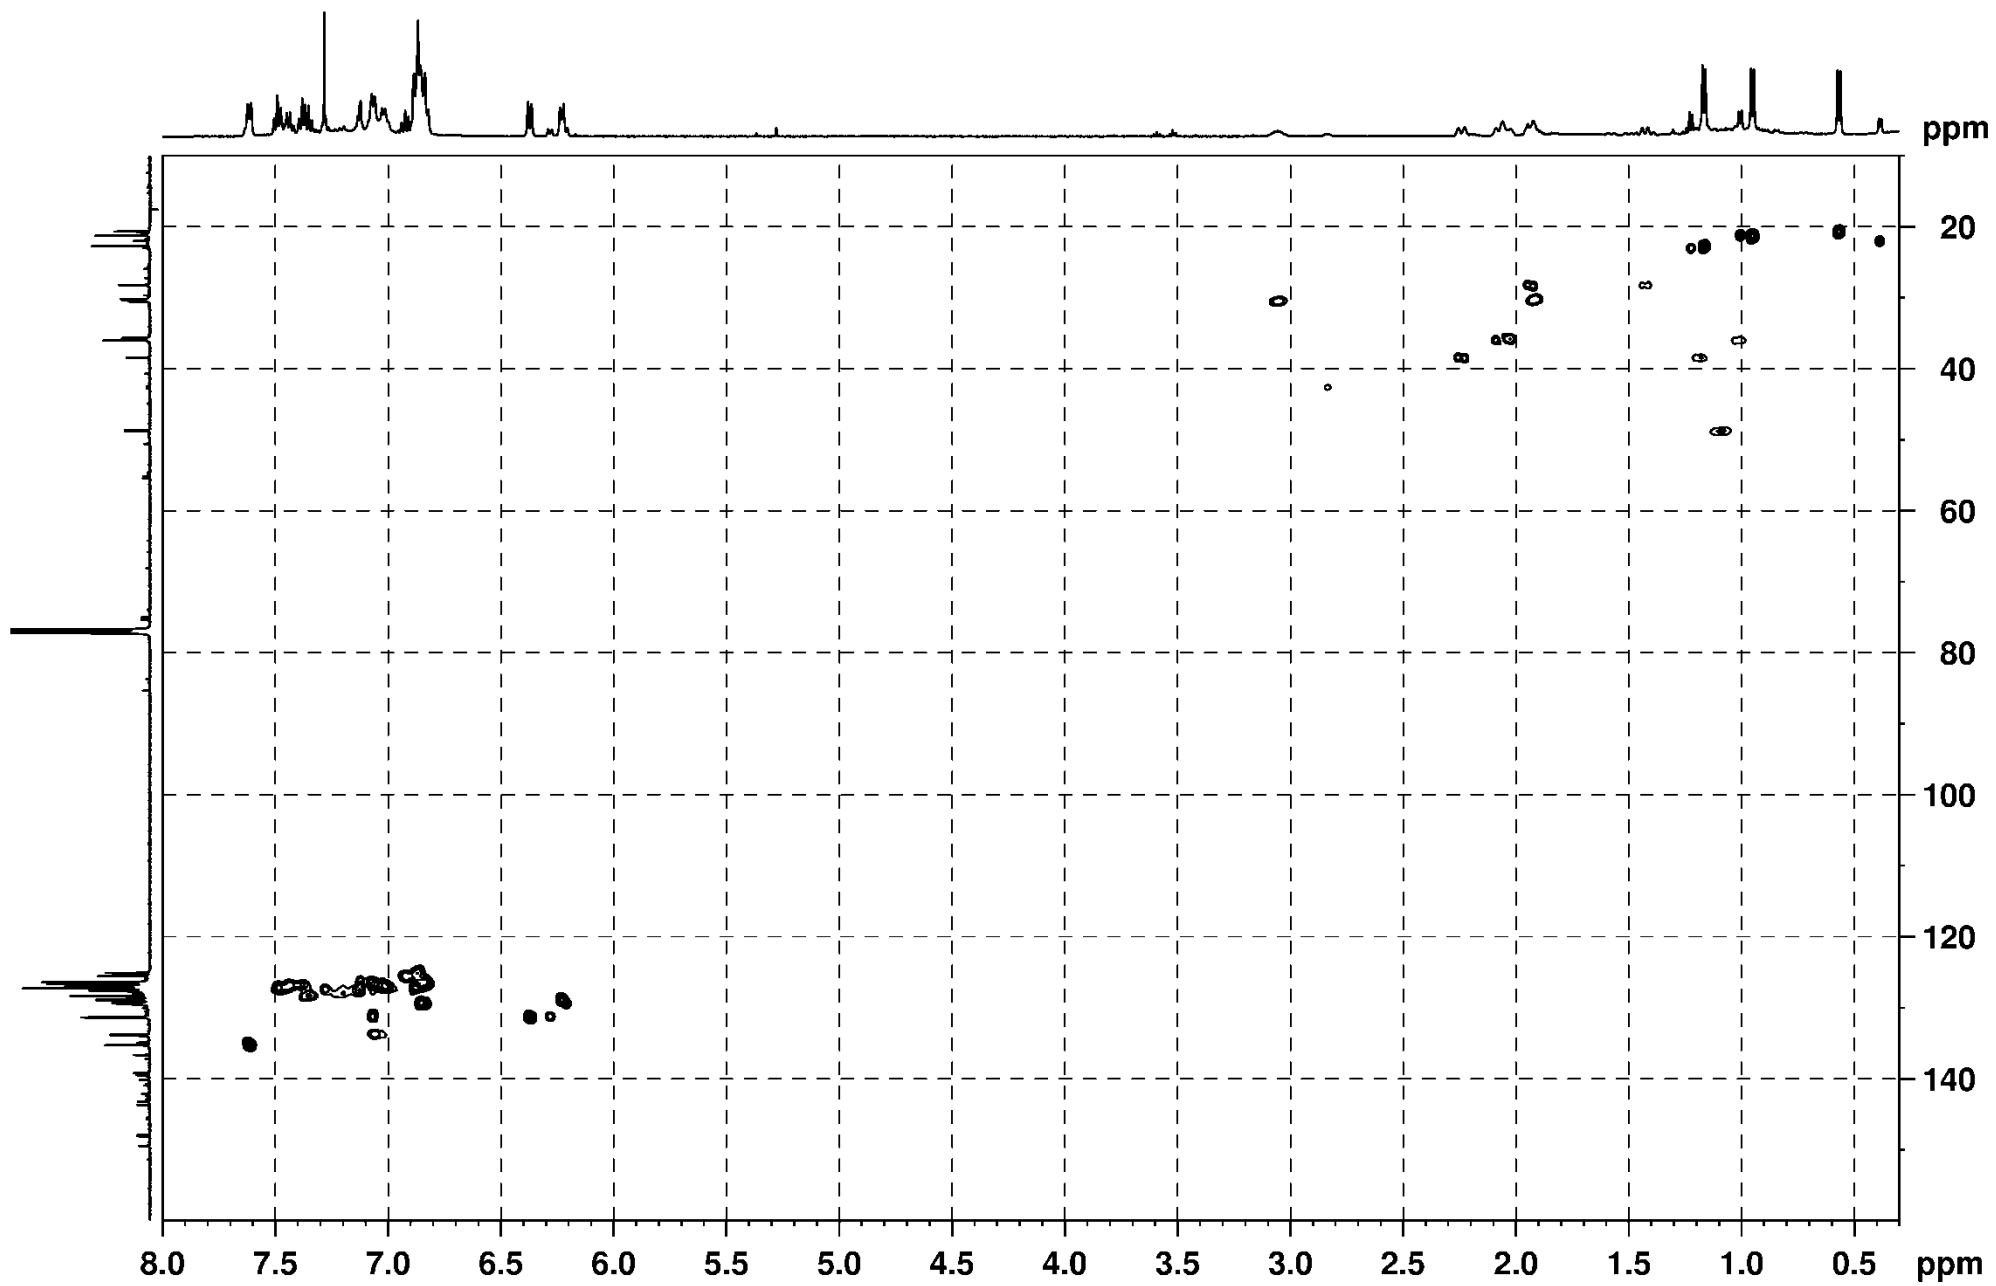

Figure S25. 2D  $^1\text{H}$ - $^{13}\text{C}$  HSQC NMR spectrum of **5a** and **5b** in  $\text{CDCl}_3$  at  $T = 303$  K.

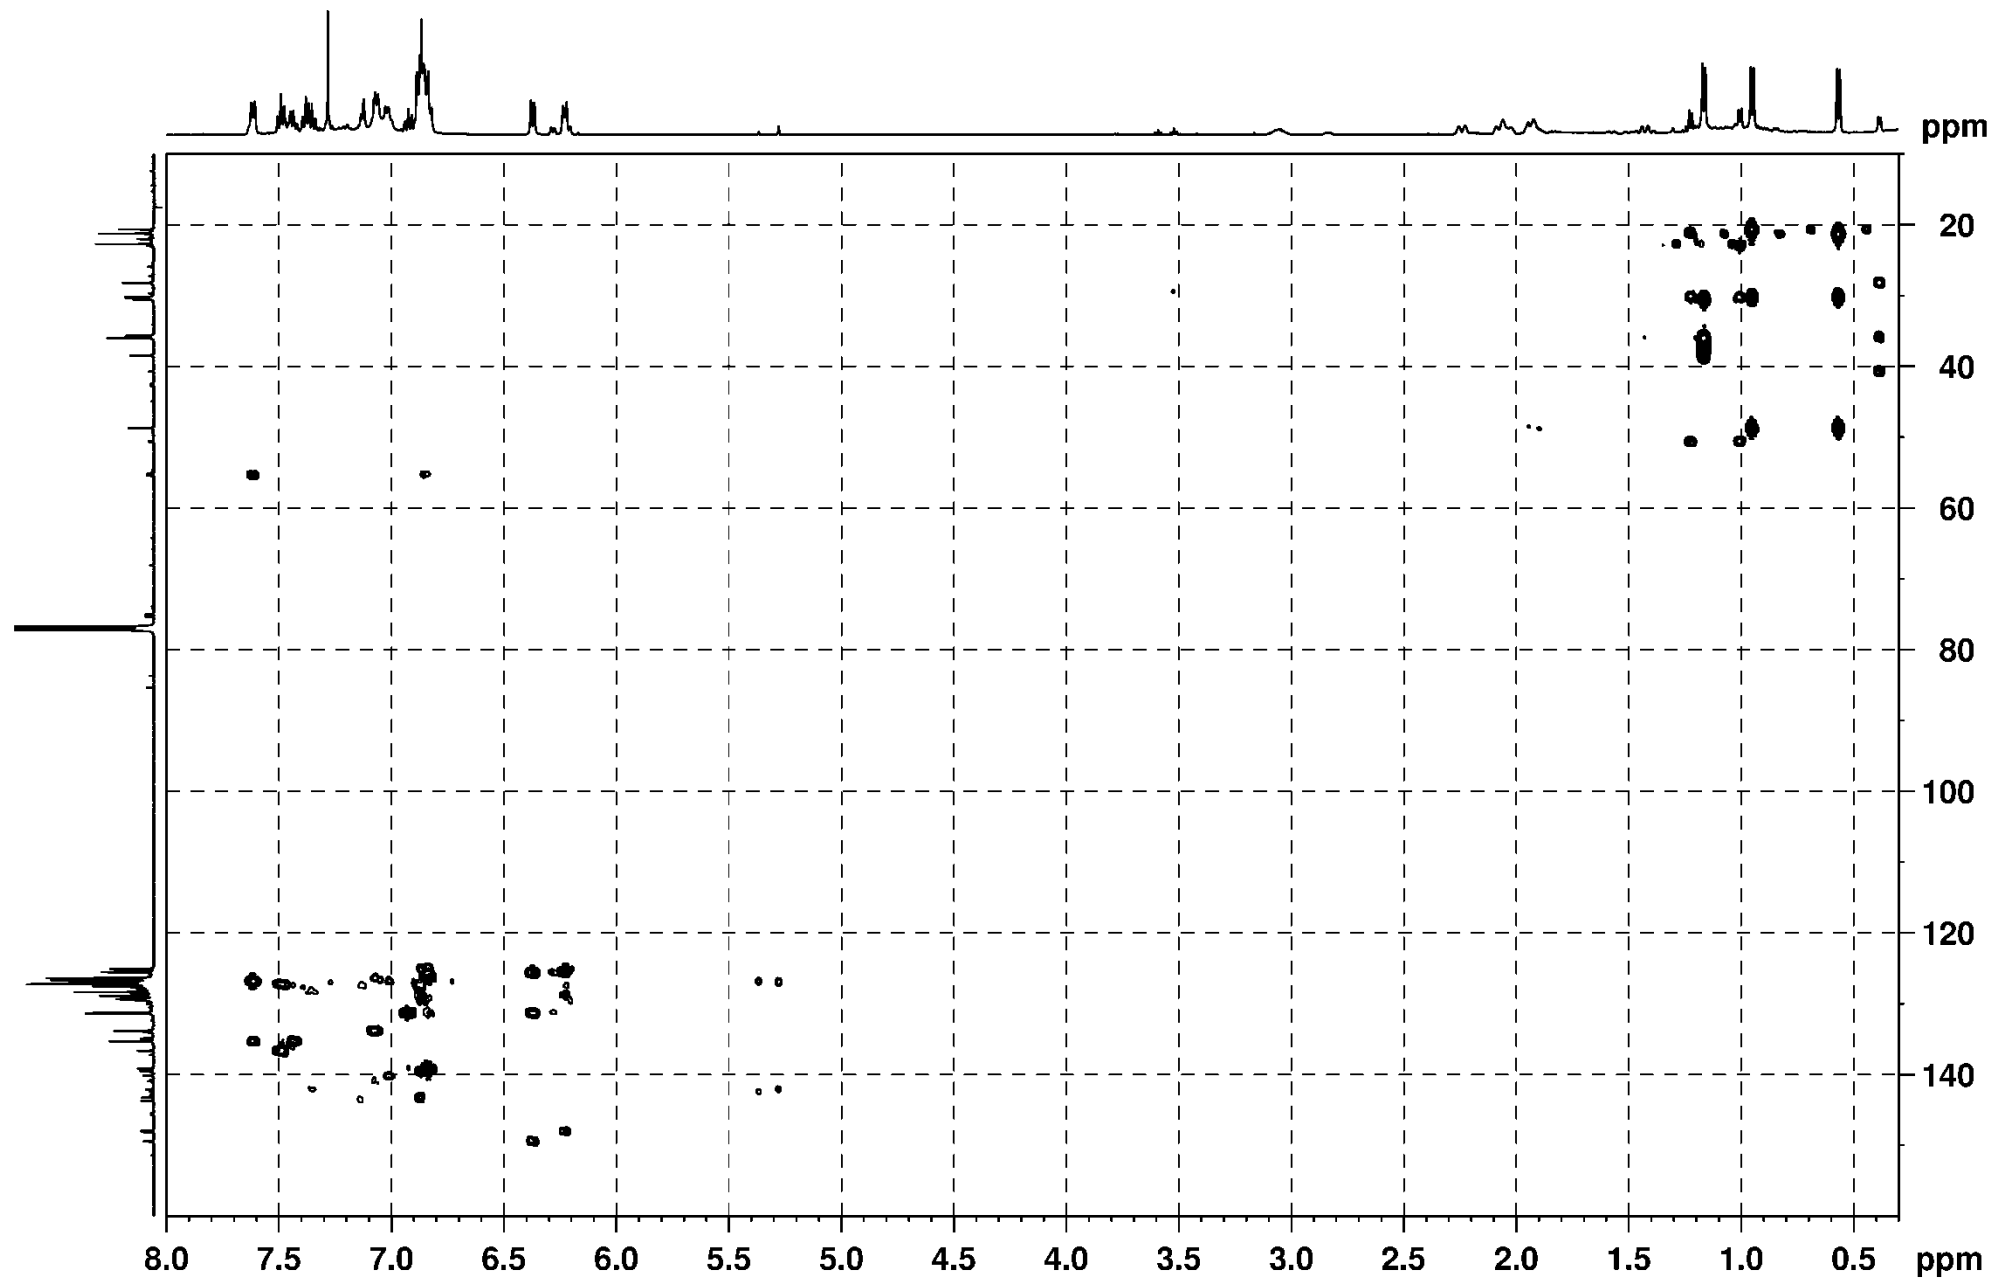

Figure S26. 2D  $^1\text{H}$ - $^{13}\text{C}$  HMBC NMR spectrum of **5a** and **5b** in  $\text{CDCl}_3$  at  $T = 303$  K.

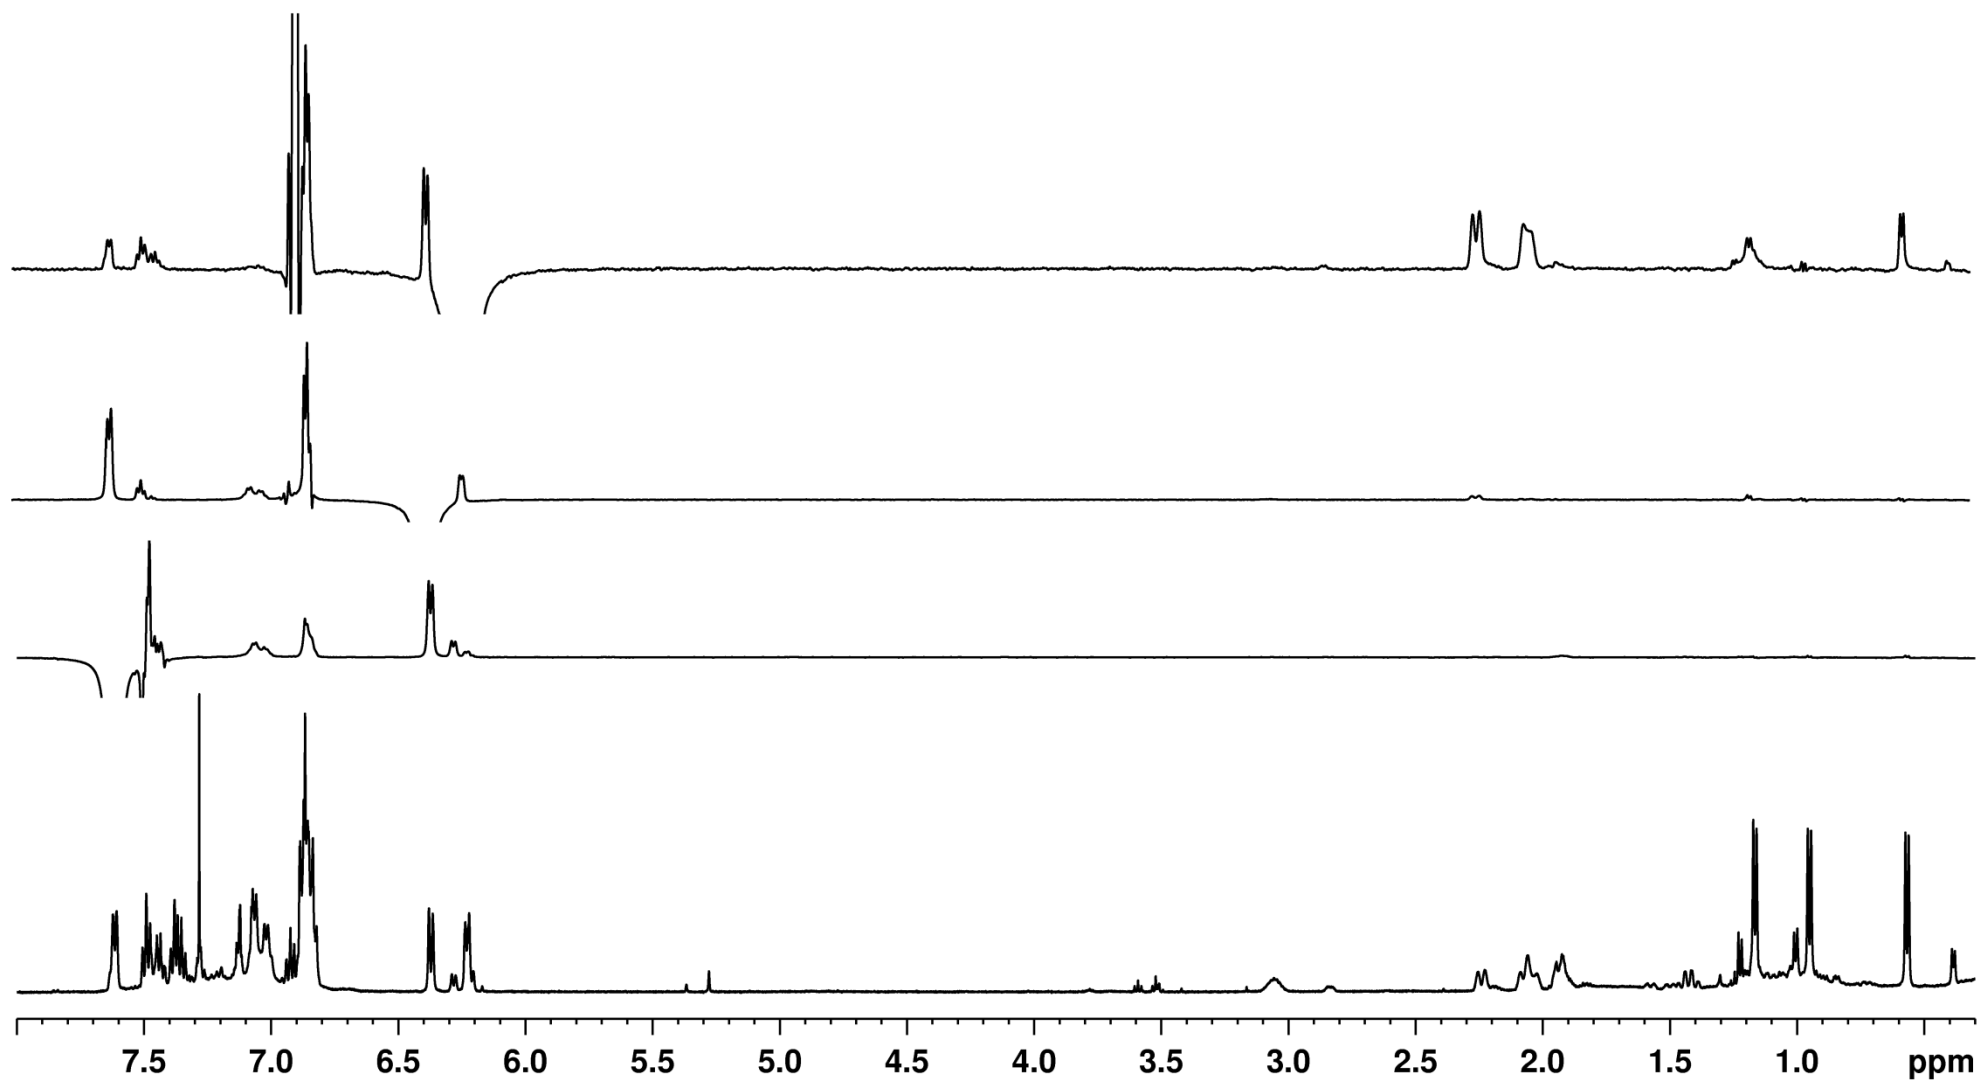

**Figure S27.** 1D  $^1\text{H}$  and  $^1\text{H}$  NOESY NMR spectra of **5a** and **5b** in  $\text{CDCl}_3$  at  $T = 303$  K.

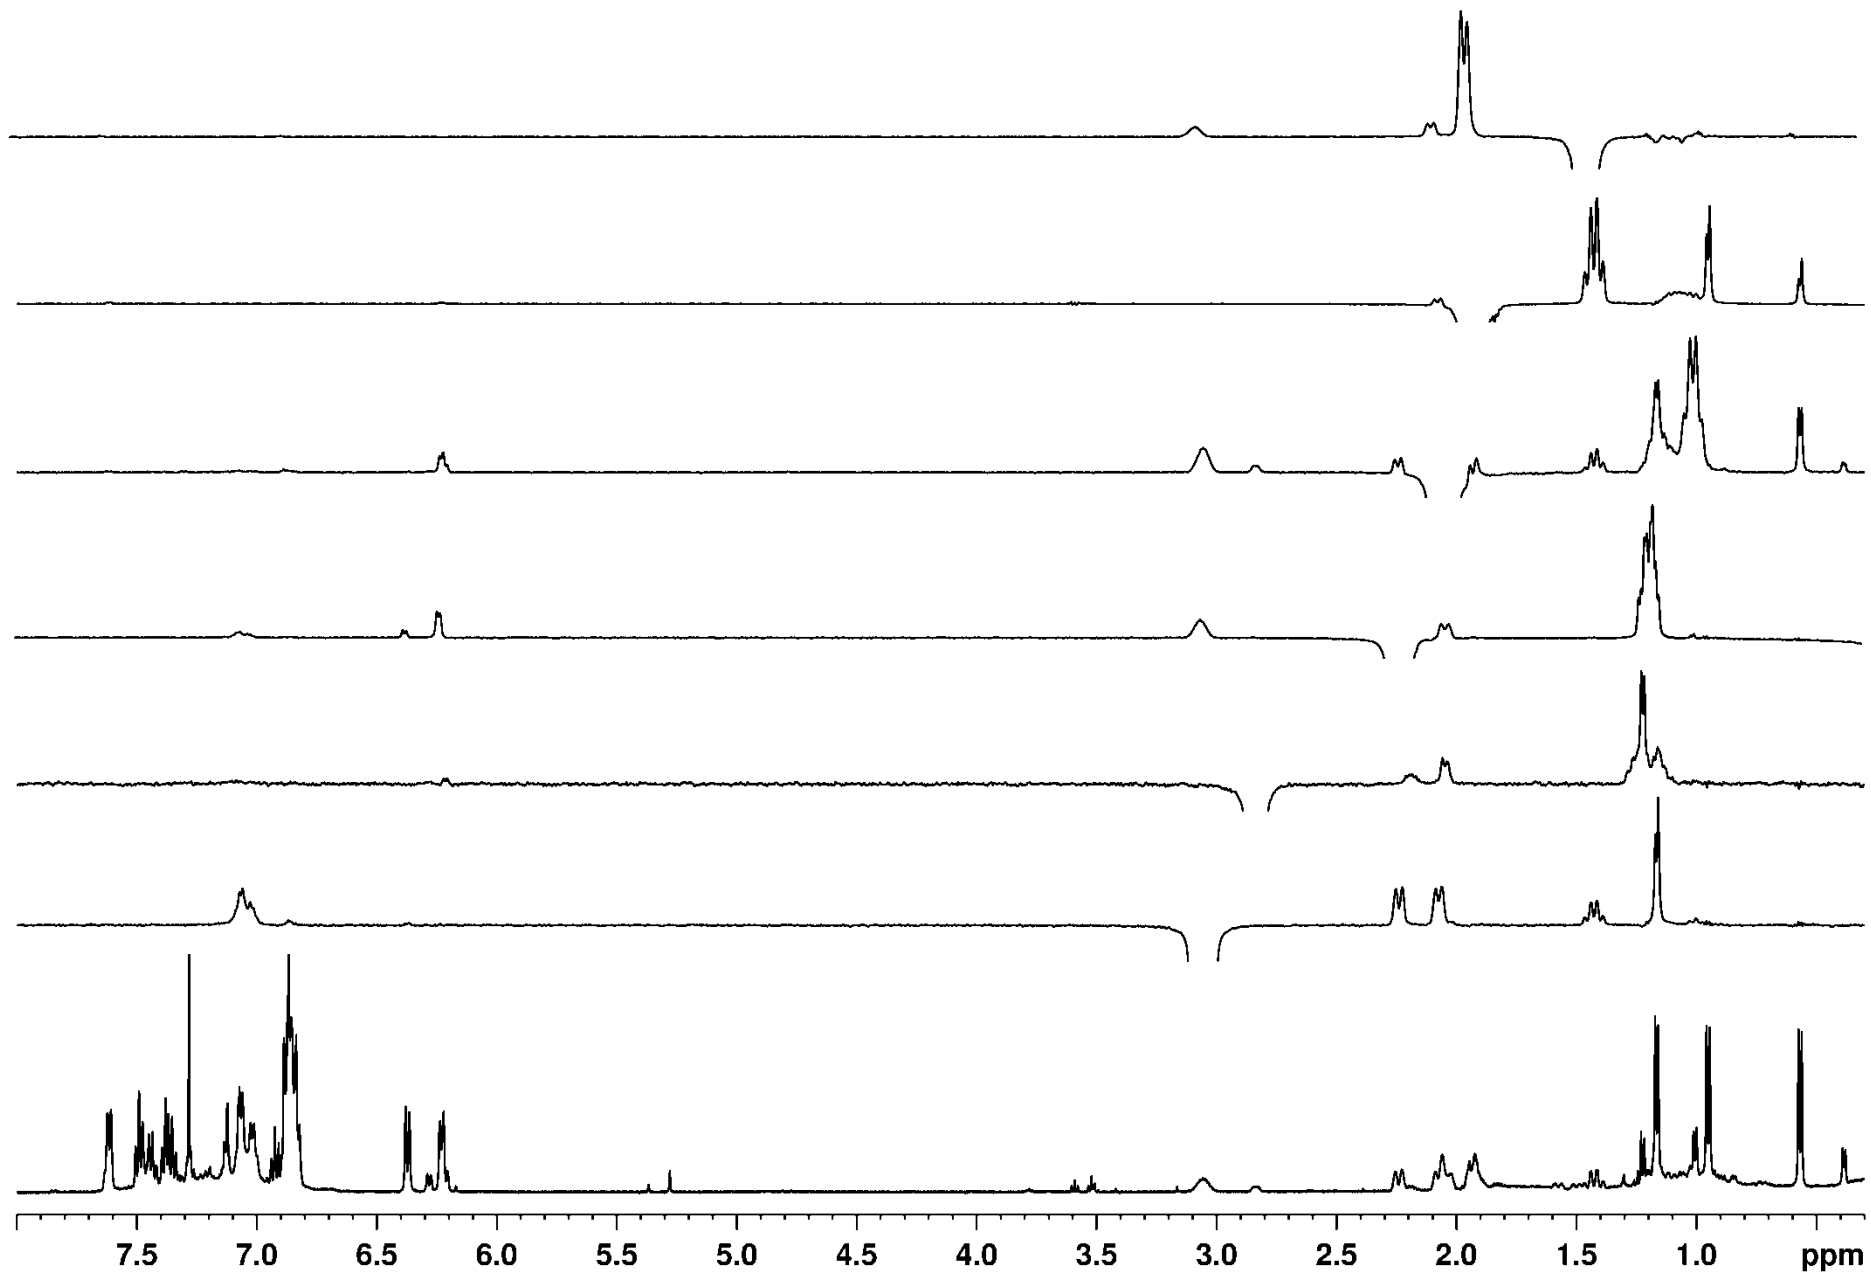

**Figure S28.** 1D <sup>1</sup>H and <sup>1</sup>H NOESY NMR spectra of **5a** and **5b** in CDCl<sub>3</sub> at T = 303 K.

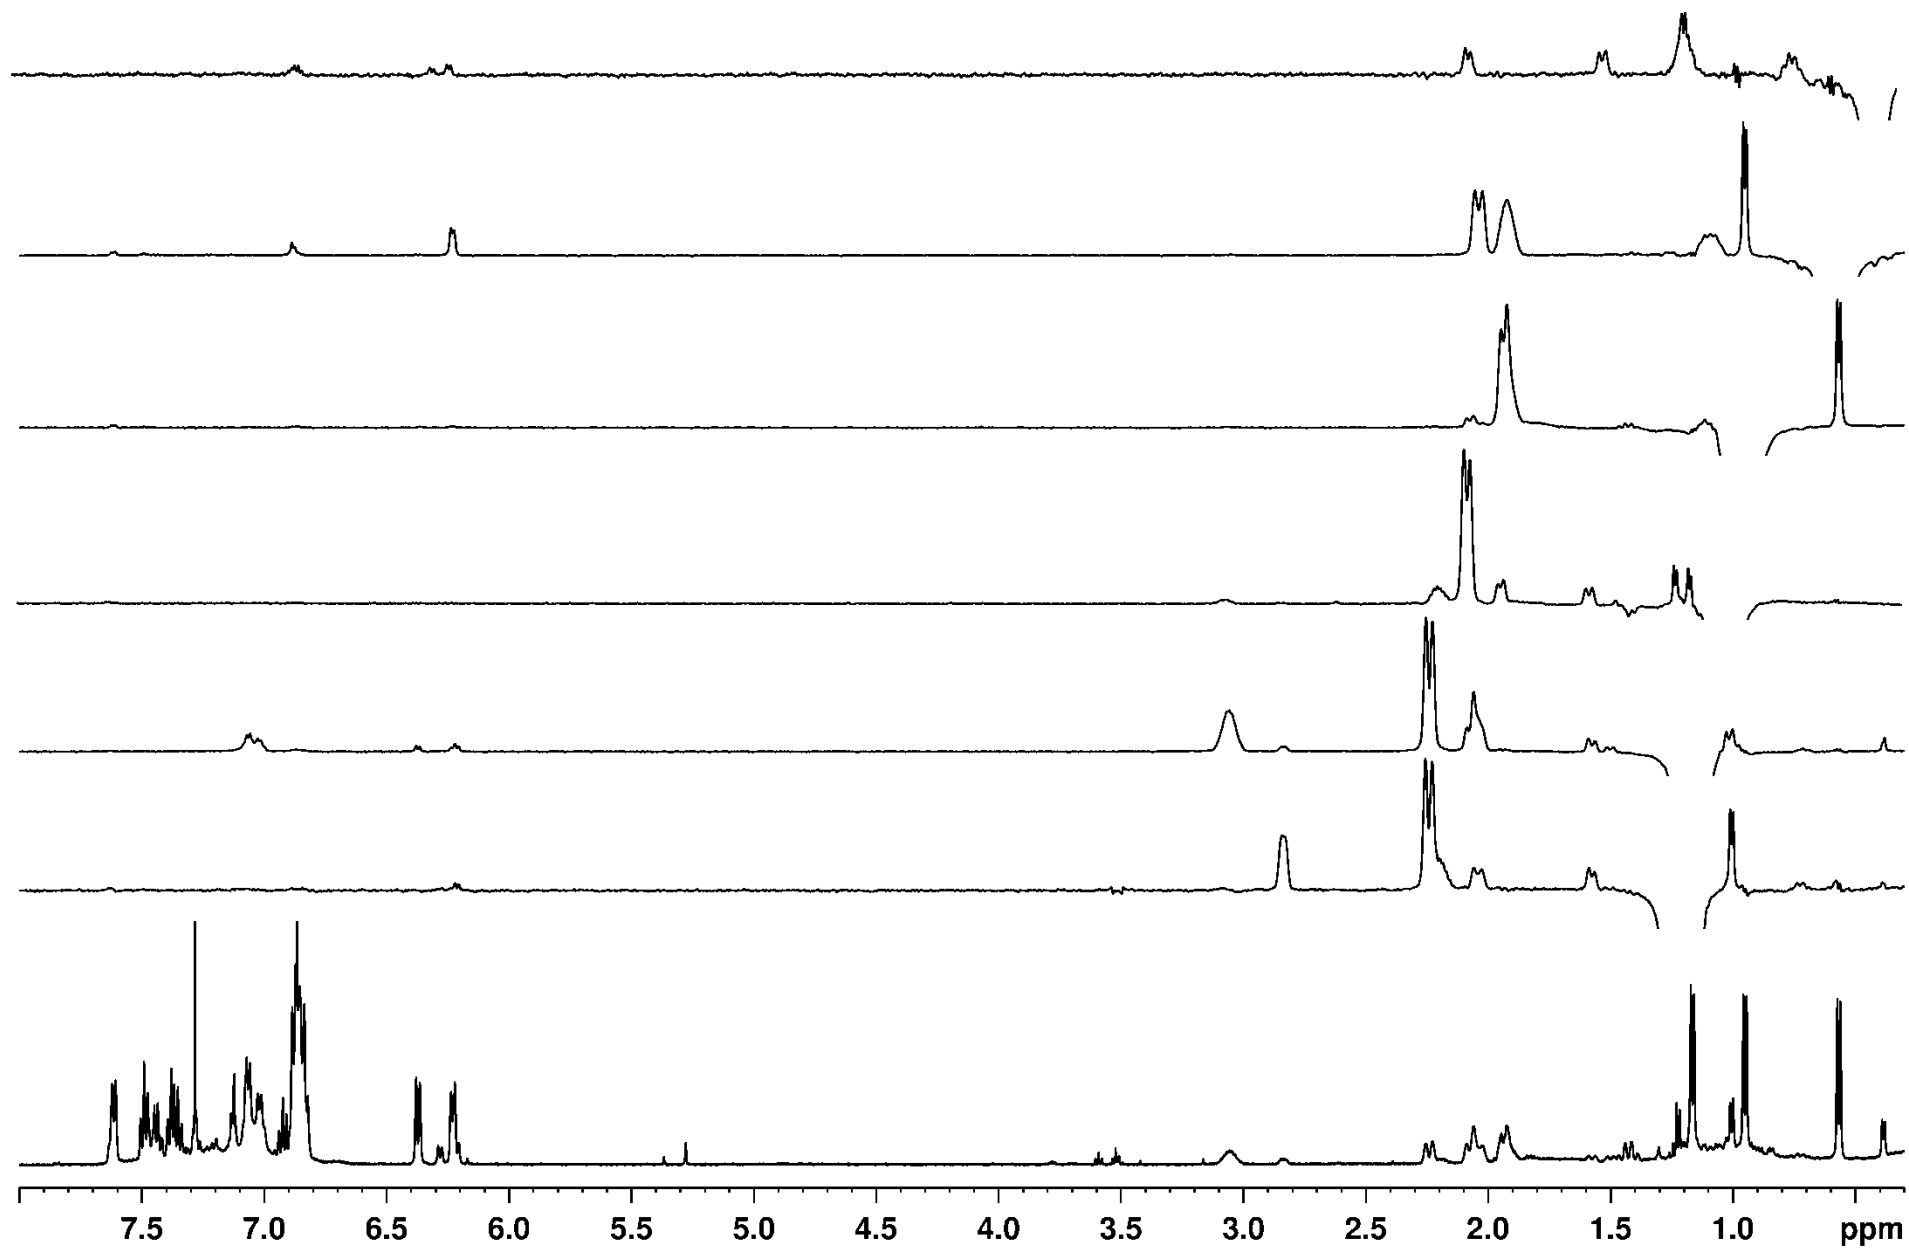

**Figure S29.** 1D  $^1\text{H}$  and  $^1\text{H}$  NOESY NMR spectra of **5a** and **5b** in  $\text{CDCl}_3$  at  $T = 303$  K.



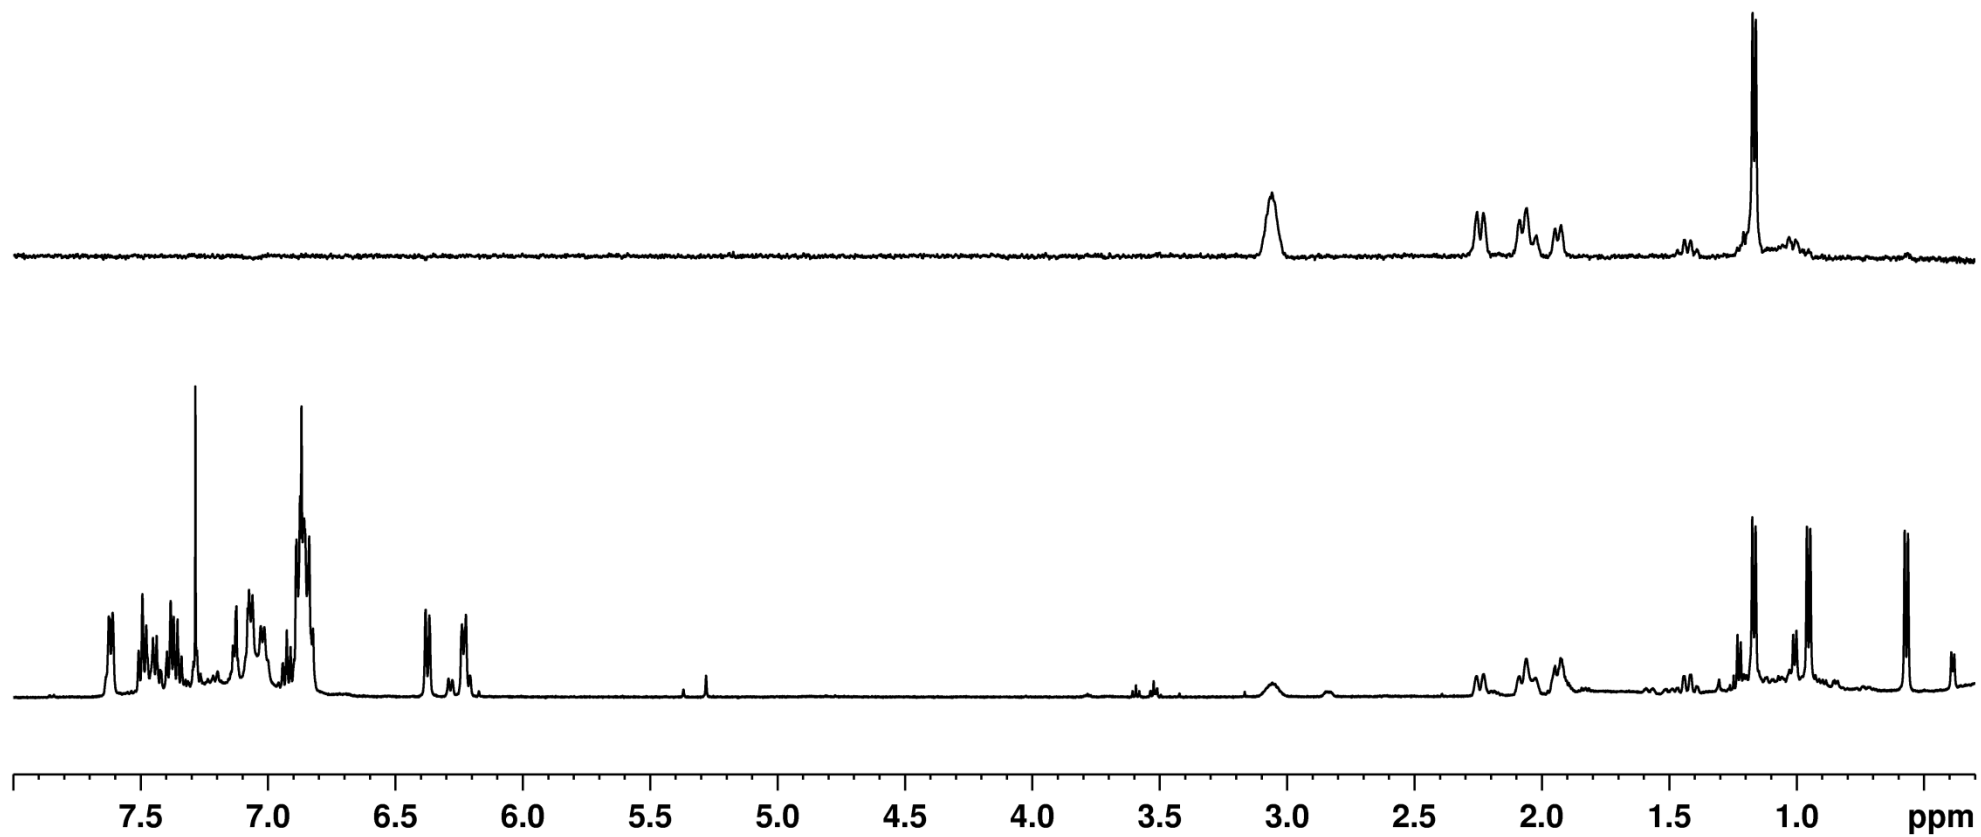

**Figure S30.** 1D  $^1\text{H}$  and  $^1\text{H}$  TOCSY NMR spectra of **5a** and **5b** in  $\text{CDCl}_3$  at  $T = 303\text{ K}$ .

## X-Ray Structure Determination

The data was collected on a Gemini diffractometer (Rigaku Oxford Diffraction) using Mo-K $\alpha$  radiation ( $\lambda = 0.71073 \text{ \AA}$ ) and  $\omega$ -scan rotation. Data reduction was performed with CrysAlisPro<sup>[3]</sup> including the program SCALE3 ABSPACK for empirical absorption correction. The structure was solved by direct methods (SIR-92)<sup>[4]</sup> and the refinement was performed with SHELXL-2018.<sup>[5]</sup> Except disordered solvent THF molecules, all non-hydrogen atoms were refined with anisotropic displacement parameters. Hydrogen atoms for methyl substituents and disordered molecules were calculated on idealized positions using the riding model, whereas all other H atoms were located on difference Fourier maps calculated at the final stage of the structure refinement. Structure figures were generated with DIAMOND-4.<sup>[6]</sup> Both THF solvent molecules are disordered in the vicinity of a twofold axis. CCDC 1988239 (**5a**) contains the supplementary crystallographic data for this paper. These data can be obtained free of charge via <https://summary.ccdc.cam.ac.uk/structure-summary-form> (or from the Cambridge Crystallographic Data Centre, 12 Union Road, Cambridge CB2 1EZ, UK; fax: (+44)1223-336-033; or [deposit@ccdc.cam.ac.uk](mailto:deposit@ccdc.cam.ac.uk)).

References: see S37

**Table S4.** Basic crystallographic structure parameters for **5a**.

|                        |                                                                             |                                   |                                             |
|------------------------|-----------------------------------------------------------------------------|-----------------------------------|---------------------------------------------|
| Molecular formula      | C <sub>44</sub> H <sub>44</sub> P <sub>2</sub> ·THF                         | Crystal size                      | 0.35 x 0.24 x 0.06 mm <sup>3</sup>          |
| Empirical formula      | C <sub>48</sub> H <sub>52</sub> OP <sub>2</sub>                             | Theta range for data collection   | 2.311 to 30.508°                            |
| Formula weight         | 706.83                                                                      | Index ranges                      | -24 ≤ h ≤ 24, -14 ≤ k ≤ 14, -32 ≤ l ≤ 32    |
| Temperature            | 130(2) K                                                                    | Reflections collected             | 26465                                       |
| Wavelength             | 0.71073 Å                                                                   | Independent reflections           | 12072 [R(int) = 0.0360]                     |
| Crystal system         | Monoclinic                                                                  | Completeness to theta = 25.242°   | 99.9 %                                      |
| Space group            | C2                                                                          | Absorption correction             | Semi-empirical from equivalents             |
| Unit cell dimensions   | a = 17.2172(4) Å<br>b = 10.3390(3) Å<br>c = 22.6719(5) Å<br>β = 101.889(2)° | Max. and min. transmission        | 1.00000 and 0.99370                         |
| Volume                 | 3949.2(2) Å <sup>3</sup>                                                    | Refinement method                 | Full-matrix least-squares on F <sup>2</sup> |
| Z                      | 4                                                                           | Data / restraints / parameters    | 12072 / 39 / 590                            |
| Density (calculated)   | 1.189 Mg/m <sup>3</sup>                                                     | Goodness-of-fit on F <sup>2</sup> | 1.006                                       |
| Absorption coefficient | 0.146 mm <sup>-1</sup>                                                      | Final R indices [I > 2σ(I)]       | R1 = 0.0524, wR2 = 0.1224                   |
| F(000)                 | 1512                                                                        | R indices (all data)              | R1 = 0.0745, wR2 = 0.1356                   |
|                        |                                                                             | Absolute structure parameter      | -0.01(3)                                    |
|                        |                                                                             | Residual electron density         | 0.531 and -0.387 e·Å <sup>-3</sup>          |

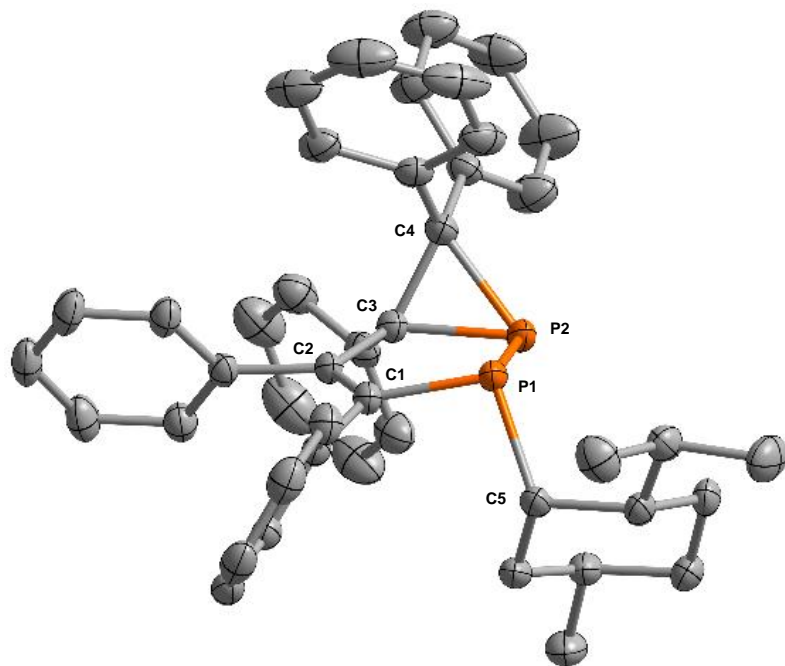

**Figure S31.** Molecular structure of 2-((+)-neomenthyl)-3,4,5,6,6-pentaphenyl-1,2-(P1<sub>R</sub>P2<sub>R</sub>C3<sub>S</sub>)-diphosfabicyclo[3.1.0]hex-3-ene (**5a**). Hydrogen atoms are omitted for clarity. Configuration of chiral atoms in the five-membered ring: P1:(*R*), P2:(*R*), C3:(*S*). Selected bond lengths [Å] and angles [°]: P1-C1 1.818(3); P1-C5 1.888(3); P1-P2 2.194(1); P2-C4 1.877(3); P2-C3 1.879(3); C1-C2 1.354(4); C2-C3 1.513(4); C3-C4 1.554(4); C1-P1-C5 99.9(1); C1-P1-P2 93.4(1); C4-P2-C3 48.9(1); C4-P2-P1 100.8(1); C3-P2-P1 94.4(1).

A crystal structure analysis of **5a** showed that only one diastereomer was obtained with the neomenthyl group in an *anti* orientation to the 3-membered P2-C3-C4(Ph<sub>2</sub>) fragment. Compound **5a** crystallizes in the monoclinic space group *C*<sub>2</sub> with a Flack parameter of -0.01(3). There are 6 chiral centers in **5a**, each phosphorus atom has a typical pyramidal environment and the menthyl fragment has the configuration of (+)-neomenthol or (1*S*,2*S*,5*R*)-2-isopropyl-5-methylcyclohexanol.

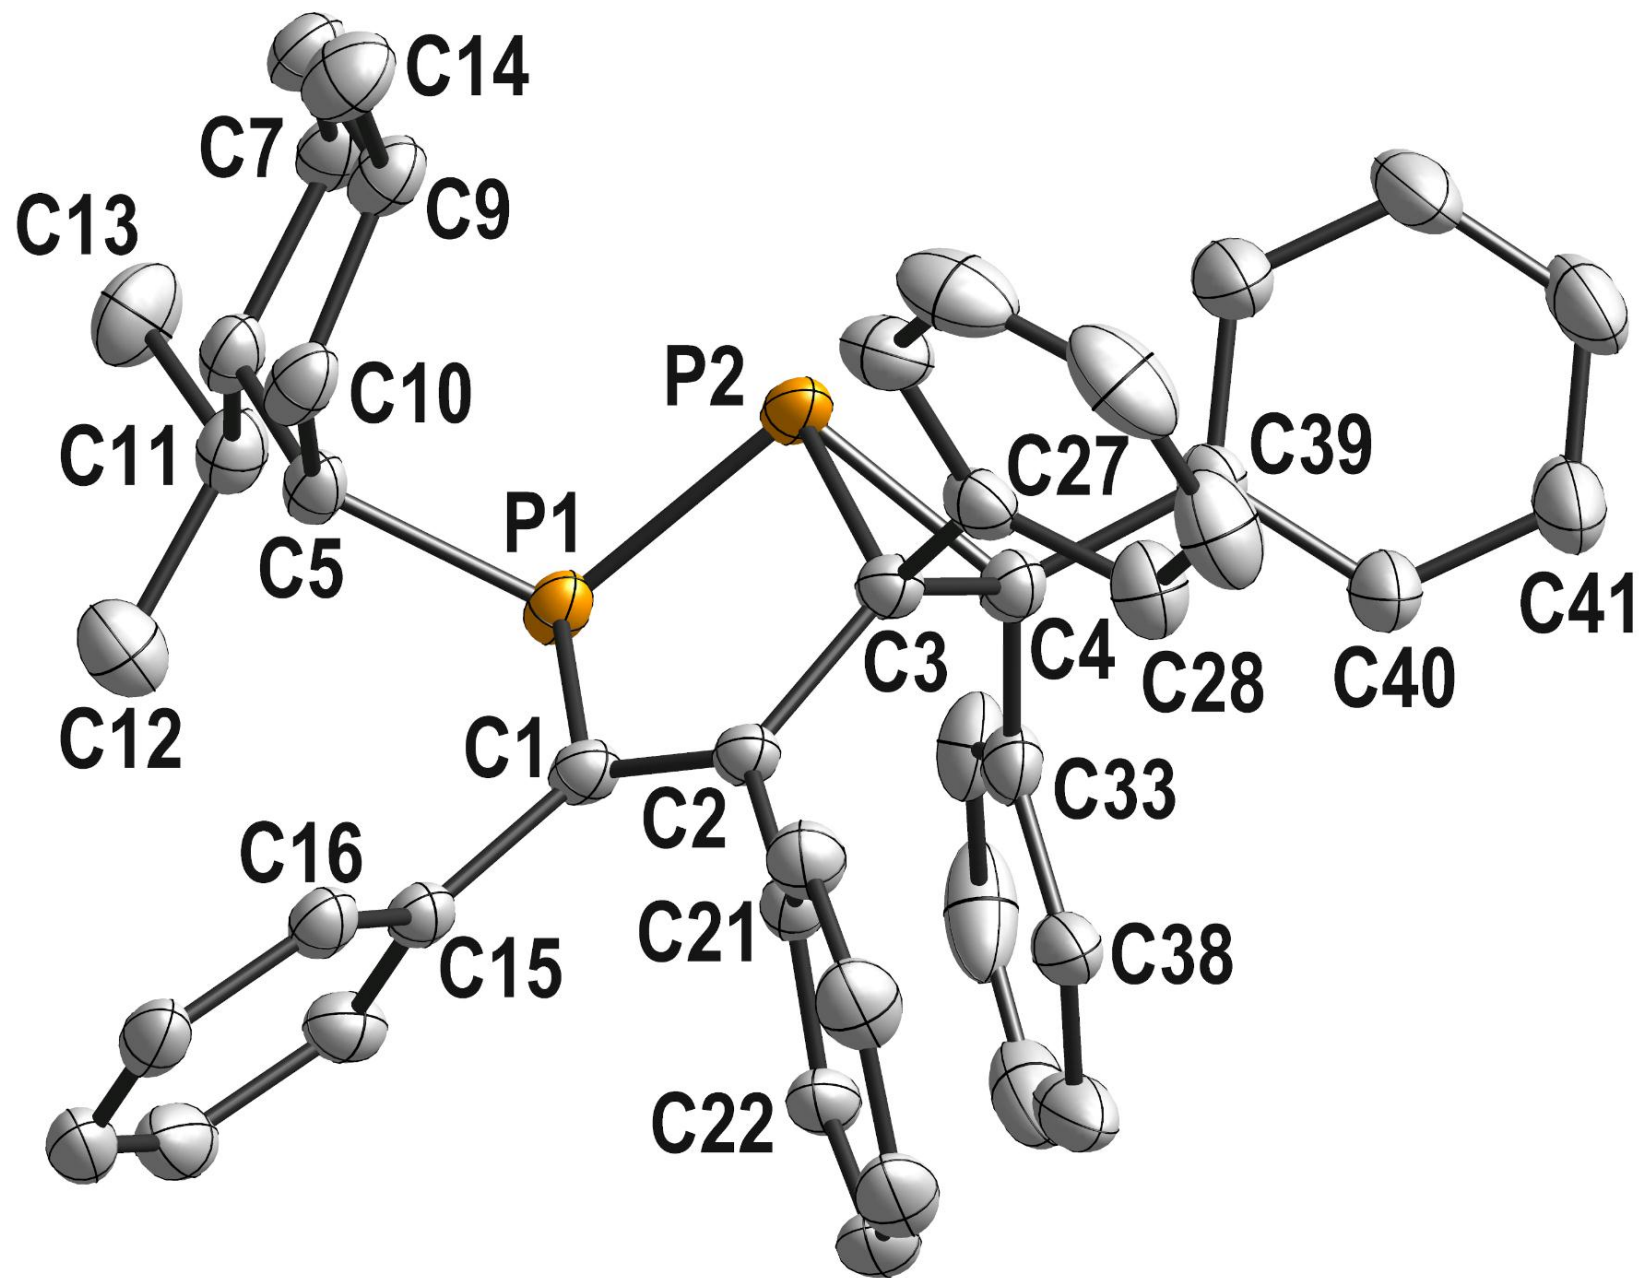

**Figure S32.** Atom-labeling scheme of **5a**. Displacement ellipsoids are drawn at the 50% probability level and H atoms are omitted for clarity.

---

## References

- (1) Frisch, M. J.; Trucks, G. W.; Schlegel, H. B.; Scuseria, G. E.; Robb, M. A.; Cheeseman, J. R.; Montgomery, J. A., Jr.; Vreven, T.; Kudin, K. N.; Burant, J. C.; Millam, J. M.; Iyengar, S. S.; Tomasi, J.; Barone, V.; Mennucci, B.; Cossi, M.; Scalmani, G.; Rega, N.; Petersson, G. A.; Nakatsuji, H.; Hada, M.; Ehara, M.; Toyota, K.; Fukuda, R.; Hasegawa, J.; Ishida, M.; Nakajima, T.; Honda, Y.; Kitao, O.; Nakai, H.; Klene, M.; Li, X.; Knox, J. E.; Hratchian, H. P.; Cross, J. B.; Adamo, C.; Jaramillo, J.; Gomperts, R.; Stratmann, R. E.; Yazyev, O.; Austin, A. J.; Cammi, R.; Pomelli, C.; Ochterski, J. W.; Ayala, P. Y.; Morokuma, K.; Voth, G. A.; Salvador, P.; Dannenberg, J. J.; Zakrzewski, V. G.; Dapprich, S.; Daniels, A. D.; Strain, M. C.; Farkas, O.; Malick, D. K.; Rabuck, A. D.; Raghavachari, K.; Foresman, J. B.; Ortiz, J. V.; Cui, Q.; Baboul, A. G.; Clifford, S.; Cioslowski, J.; Stefanov, B. B.; Liu, G.; Liashenko, A.; Piskorz, P.; Komaromi, I.; Martin, R. L.; Fox, D. J.; Keith, T.; Al-Laham, M. A.; Peng, C. Y.; Nanayakkara, A.; Challacombe, M.; Gill, P. M. W.; Johnson, B.; Chen, W.; Wong, M. W.; Gonzalez, C.; Pople, J. A. *Gaussian 03, Revision B.04*; Gaussian, Inc., Pittsburgh, PA, 2003.
- (2) Latypov, Sh.K.; Polyancev, F.M.; Yakhvarov, D.G.; Sinyashin, O.G. Quantum Chemical Calculations of  $^{31}\text{P}$  NMR Chemical Shifts: Scopes and Limitations. *Phys. Chem. Chem. Phys.* **2015**, *17*, 6976–6987.
- (3) CrysAlisPro: Data reduction software package, Rigaku Oxford Diffraction, Oxford, UK.
- (4) SIR92: A. Altomare, G. Cascarano, C. Giacovazzo and A. Guagliardi, *J. Appl. Crystallogr.* 1993, *26*, 343-350
- (5) SHELXL: G. M. Sheldrick, *Acta Cryst.* C71 (2015) 3 – 8
- (6) DIAMOND 4: K. Brandenburg, Crystal Impact GbR, Bonn, Germany
